# Supplementary material for: From plans to actions in patient and public involvement: qualitative study of documented plans and the accounts of researchers and patients sampled from a cohort of clinical trials
Source: PubMed Central journal article supplement (PMC4256646; doi:10.1136/bmjopen-2014-006400), 2014-12-04
Supplement: bmjopen-2014-006400.draft_revisions.pdf [file bmjopen-2014-006400.draft_revisions.pdf]

# BMJ Open

**From plans to actions in patient and public involvement:  
Qualitative study of documented plans and the accounts of  
researchers and patients sampled from a cohort of clinical  
trials**

|                                    |                                                                                                                                                                                                                                                                                                                                                                                                              |
|------------------------------------|--------------------------------------------------------------------------------------------------------------------------------------------------------------------------------------------------------------------------------------------------------------------------------------------------------------------------------------------------------------------------------------------------------------|
| Journal:                           | <i>BMJ Open</i>                                                                                                                                                                                                                                                                                                                                                                                              |
| Manuscript ID:                     | bmjopen-2014-006400                                                                                                                                                                                                                                                                                                                                                                                          |
| Article Type:                      | Research                                                                                                                                                                                                                                                                                                                                                                                                     |
| Date Submitted by the Author:      | 17-Aug-2014                                                                                                                                                                                                                                                                                                                                                                                                  |
| Complete List of Authors:          | Buck, Deborah; University of Liverpool, Biostatistics<br>Gamble, Carrol; The University of Liverpool, Biostatistics<br>Dudley, Louise; University of Liverpool,<br>Preston, Jennifer; University of Liverpool, Women's and Children's Health<br>Hanley, Bec; TwoCan Associates,<br>Williamson, Paula; University of Liverpool, Biostatistics<br>Young, Bridget; University of Liverpool, Clinical Psychology |
| <b>Primary Subject<br>Heading</b>: | Health services research                                                                                                                                                                                                                                                                                                                                                                                     |
| Secondary Subject Heading:         | Qualitative research                                                                                                                                                                                                                                                                                                                                                                                         |
| Keywords:                          | QUALITATIVE RESEARCH, Clinical trials < THERAPEUTICS, patient and<br>public involvement, patient and public engagement                                                                                                                                                                                                                                                                                       |
|                                    |                                                                                                                                                                                                                                                                                                                                                                                                              |

SCHOLARONE™  
Manuscripts

Only

**From plans to actions in patient and public involvement: Qualitative study of documented plans  
and the accounts of researchers and patients sampled from a cohort of clinical trials**

Deborah Buck, Carrol Gamble, Louise Dudley, Jennifer Preston, The EPIC Patient Advisory Group, Bec Hanley, Paula R Williamson, Bridget Young

Deborah Buck, Research Associate  
Department of Biostatistics, University of Liverpool, 1<sup>st</sup> floor Duncan Building, Daulby Street, Liverpool, L69 3GA

Carrol Gamble, Professor of Medical Statistics  
Department of Biostatistics, University of Liverpool, 1<sup>st</sup> floor Duncan Building, Daulby Street, Liverpool, L69 3GA

Louise Dudley, Research Associate  
Department of Biostatistics, University of Liverpool, 1<sup>st</sup> floor Duncan Building, Daulby Street, Liverpool, L69 3GA

Jennifer Preston, Consumer Liaison Manager  
NIHR Clinical Research Network: Children, Coordinating Centre, University of Liverpool, Department of Women's and Children's Health, Institute of Translational Medicine (Child Health), Alder Hey Children's NHS Foundation Trust, Eaton Road, Liverpool, L12 2AP

The EPIC Patient Advisory Group (Alison Allam, Philip Bell, Neil Formstone, Heather Goodare, and Alison Walker), Department of Biostatistics, University of Liverpool, 1<sup>st</sup> floor Duncan Building, Daulby Street, Liverpool, L69 3GA

Ms Bec Hanley. Co-director of TwoCan Associates  
TwoCan Associates, 59 Wickham Hill, Hurstpierpoint, Hassocks, BN6 9NR

Paula R Williamson, Professor of Medical Statistics  
Department of Biostatistics, University of Liverpool, 1<sup>st</sup> floor Duncan Building, Daulby Street, Liverpool, L69 3GA

Bridget Young, Professor of Psychology  
Department of Psychological Sciences, University of Liverpool, Whelan Building, Liverpool, L69 3GB

**Corresponding author:**

Professor Bridget Young

Email: [byoung@liv.ac.uk](mailto:byoung@liv.ac.uk) Tel: 0151 794 5525

**Keywords:** consumer participation; public and patient involvement; clinical trials

**Word count:** 7642 excluding Abstract, tables, figure, box, and references

## Abstract

### Background

Patient and public involvement (PPI) in research is increasingly required, although evidence to inform its implementation is limited.

### Objective

Inform the evidence base by describing how plans for PPI were implemented within clinical trials and identifying the challenges and lessons learnt by research teams.

### Methods

We compared PPI plans extracted from clinical trial grant applications (funded by the National Institute for Health Research Health Technology Assessment Programme between 2006-2010) with researchers' and PPI contributors' interview accounts of PPI implementation. Thematic analysis of PPI plans and transcribed qualitative interviews drew on the Framework technique.

### Results

Of 28 trials, 25 documented plans for PPI in funding applications and half described implementing PPI before applying for funding. Plans varied from minimal to extensive, although almost all anticipated multiple modes of PPI. Interview accounts indicated that PPI plans had been fully implemented in 20/25 trials and even expanded in some. Nevertheless, some researchers described PPI within their trials as tokenistic. Researchers and contributors noted that late or minimal PPI engagement diminished its value. Both groups perceived uncertainty about roles in relation to PPI, and noted contributors' lack of confidence and difficulties attending meetings. PPI contributors experienced problems in interacting with researchers and understanding technical language. Researchers reported difficulties finding 'the right' PPI contributors, and advised caution when involving investigators' current patients.

### Conclusion

Engaging PPI contributors early and ensuring ongoing clarity about their activities, roles and goals, is crucial to PPI's success. Funders, reviewers, and regulators should recognise the value of pre-application PPI and allocate further resources to it. They should also consider whether PPI plans in grant applications match a trial's distinct needs. Monitoring and reporting PPI before, during, and after trials will help the research community to optimise PPI, although the need for ongoing flexibility in implementing PPI should also be recognised.

**Strengths and limitations of this study**

- This was the first study to examine whether plans for patient and public involvement (PPI), as documented in trialists' grant applications, were subsequently implemented.
- Semi-structured interviews with chief investigators and patients allowed us to identify challenges to implementing PPI, and lessons learnt, from a range of informant perspectives.
- The study benefited from the inclusion of a combination of trials which had ended at the time of the interviews, and those which were ongoing.
- Some informants struggled to recall events pertaining to PPI for trials which had ended - a drawback of retrospective study designs.
- We used a historical cohort of trials, funded four to eight years previously. The emphasis on PPI has grown over these years, thus our findings may not fully reflect the planning and implementation of PPI in trials funded more recently.

## Introduction

There are several schools of thought regarding why patient contributors should be involved as advisors or partners in health care research, rather than just as participants. Ethical and political arguments for patient partnerships are based upon values such as democracy, accountability and empowerment. [1-3] Alongside these values are pragmatic arguments which revolve around the belief that patient and public involvement (PPI) can enhance the relevance, validity, quality, and success of research [1-5] The growth in PPI both nationally and internationally [6-8] is reflected by its increasing assimilation into grant applications, with funding bodies encouraging researchers to submit plans for PPI in order to obtain funding. [2 9-12] Such developments have branched out into other realms including patient partnerships in academic publishing, for instance within the BMJ. [13]

For PPI contributors, getting involved in research has been reported to lead to 'personal development' such as boosting confidence, empowerment and a sense of purpose.[14] Similarly there can be personal benefits for researchers who have reported that their attitudes, values and beliefs about the worth of PPI had been heightened as a result of such involvement.[15] However, there are indications that 'patient influence' can pose a potential threat to the validity of research, as well as being a vehicle for research validity.[2] For example, it has potential to lead to bias,[2] while PPI in technical decisions may result in worse as opposed to improved project outcomes.[16]

Challenges to the realisation of plans for PPI include debate regarding its purpose, lack of evidence regarding the impact of PPI, complexities in researchers and contributors sharing power, and difficulties in ensuring sufficient resources for PPI.[4 10 15 17-19] Alongside such challenges are uncertainties regarding how best to plan PPI, especially in the context of randomised controlled trials (RCTs). Evidence on how to implement PPI is particularly limited in this setting, and there has been no systematic evaluation of the extent to which trialists' intentions for PPI are put into practice. This is an important gap in view of the above challenges and the increased onus on researchers to build plans for PPI into their grant applications. Such plans run the risk of being uninformed due to the lack of evidence. In this paper we aim to inform practice for trialists and contributors by describing the extent to which documented PPI plans were implemented within a sample of clinical trials and identifying the challenges met and the lessons learnt. Given that funding bodies encourage PPI, we also aim to inform policy with regard to post-trial scrutiny of PPI in terms of processes, facilitators and barriers, and impacts.

## Methods

### Terminology

We use the term 'PPI contributors' or 'contributors' rather than the more commonly used term 'PPI representatives' to avoid implying that a few individuals can represent the perspectives of diverse patient groups and members of the public, and 'informants' to refer collectively to the researchers (primarily chief investigators (CIs)) and PPI contributors. We use the terms 'documented plans' to refer to the plans for PPI which were written into the funding application or study protocol and 'expectations' to refer to what the trial team expected PPI to achieve, as described by the researchers during the interviews.

### Design

This qualitative study formed part of the 'Evidence base for Patient and public Involvement in Clinical trials' (EPIC) project. EPIC aimed to investigate PPI in a cohort of RCTs funded by the National Institute for Health Research (NIHR) Health Technology Assessment (HTA) programme between 2006 and 2010. We have described the methods in full elsewhere.[20] In summary, EPIC comprised four phases. Phase 1 examined trialists' plans for PPI as described within their outline and full funding applications. Phase 2 was a questionnaire survey of chief investigators' (CIs) and PPI contributors' opinions and activities concerning PPI. Phase 3 involved qualitative interviews with CIs, PPI contributors and trial managers (TMs). Phase 4 examined the role of clinical trials units in identifying and supporting PPI activity in trials.

The current paper draws mostly on data from Phases 1 and 3 and, to a lesser extent, Phase 2. EPIC had a patient advisory group, consisting of five people with experience of being a patient or carer, previous PPI contribution in trials, and lay review of funding applications and membership of funding panels. The National Research Ethics Service (NRES) advised that EPIC did not require NRES ethics approval; we therefore sought and obtained a favourable ethical opinion from the University of Liverpool Research Ethics Committee (Ref: RETH000489).

### Sampling and recruitment for semi-structured interviews

We emailed CIs at the address given on their grant application form. We aimed for a diverse sample of CIs for interview, based on their responses to questions within the CI survey concerning motivations for including PPI and its perceived impact, although we ultimately invited all but three of the CIs who had responded to the survey and expressed an interest in being interviewed. Three CIs were not invited because of delays in responding to the survey. We identified and invited PPI contributors to be interviewed through the CIs, chairs of steering committees, and advertisements

1  
2  
3 on PPI websites. Potential informants were sent an email with an information leaflet which included  
4 the purpose of the qualitative study.  
5  
6

7  
8 LD conducted semi-structured telephone interviews with informants between April 2013 and  
9 November 2013, seeking their views and experiences of PPI within their trial. The interviewer had a  
10 BSc and MRes in psychology, and previous experience and training of conducting and analysing  
11 qualitative interviews. Apart from the recruitment emails, the interviewer had not established a  
12 relationship with the participants prior to study commencement. LD was new to the field of patient  
13 involvement in research and sought to maintain an open minded approach in exploring its  
14 implementation in trials. The interviews were audio-recorded, transcribed, anonymised and checked  
15 for accuracy. The interviewer used topic guides which were reviewed by our patient advisory group,  
16 and developed in light of ongoing data analysis. The interviews were conversational in nature,  
17 enabling informants to freely describe their experiences and raise topics which we had not  
18 anticipated. Informants gave their informed consent for the interviews to be audio-recorded and  
19 analysed. During the interviews we asked all informants to describe the type of PPI activity that had  
20 taken place in the trial. In order to foster rapport between informant and interviewer we  
21 intentionally avoided direct questions about why any plans were not implemented. However, we did  
22 ask CIs whether they would do anything differently regarding PPI if they were to start the trial again.  
23 We asked PPI contributors about any challenges and explored their views on how PPI could be  
24 enhanced in future trials. No field notes or repeat interviews were undertaken. Transcripts were not  
25 returned to participants for comment/correction.  
26  
27  
28  
29  
30  
31  
32  
33  
34  
35  
36

### 37 38 **Data sources**

39 Primary sources of data were: trial documentation (full application forms, reviewer comments,  
40 detailed project descriptions and study protocols), from which we extracted data about plans for  
41 PPI; and CI and PPI contributor interview transcripts, from which we determined whether the  
42 documented plans were implemented. Secondary sources of data were: outline application forms; CI  
43 survey responses; and TM interview transcripts. We used the secondary sources in cases of  
44 ambiguity, i.e. where it was unclear from the primary sources whether aspects of a particular set of  
45 plans had been implemented. We also used the secondary sources to elucidate the illustrative  
46 examples that we present in the results below.  
47  
48  
49  
50  
51  
52

### 53 54 **Analysis**

1  
2  
3 To be eligible for the current analysis at least one source of interview data was required from either  
4 the CI or PPI contributor, as well as the grant application documents from which we identified and  
5 extracted data regarding plans for PPI. To determine the extent to which these documented plans  
6 were implemented we focused equally on the qualitative data from the CI and PPI contributor  
7 interview transcripts. In cases of ambiguity we consulted the TM interview transcripts, where  
8 available. We used thematic analysis, a method for identifying, analysing, and reporting patterns  
9 (themes) within data, to inform our interpretations.[21] For the purposes of determining the PPI  
10 activity undertaken, challenges met and lessons learnt, one author (DB) first familiarised herself with  
11 the data by reading the transcripts several times, before drawing on the Framework technique[22]  
12 to develop and apply open codes to the interview data. She then grouped the codes into broader  
13 categories within the framework and compared these with data extracted from the documented  
14 plans. Other members of the EPIC team who were familiar with the interview transcripts and  
15 documented plans examined the early stages and ongoing refinements of the descriptive coding  
16 framework, as well as the tabulated comparisons of planned and implemented PPI. CG had analysed  
17 the CI survey and application forms, and LD and BY had analysed the interview data to explore the  
18 perceived impact of PPI,[20] thus providing confidence in the credibility and 'confirmability' of the  
19 present findings.[23] Moreover, DB analysed the interview transcripts before looking at the  
20 documented plans that had been extracted from the grant application forms, thus helping to reduce  
21 the chances that the documented plans would unduly influence her interpretations of informants'  
22 interview accounts of PPI. Informants were not asked to provide feedback on the findings. A  
23 description of the coding frame is available upon request.  
24  
25  
26  
27  
28  
29  
30  
31  
32  
33  
34  
35  
36  
37  
38

39 We provide illustrative quotes from a range of interviews and trial documents. Identification codes  
40 signify the source of informant quotes based on their group (i.e. CI or PPI contributor) followed by  
41 their anonymised trial identification number. Where more than one PPI contributor was interviewed  
42 for the same trial, we indicate as PPI 1 or PPI 2. Codes for documented plans refer to anonymised  
43 trial identification numbers. We replaced identifying text within quotes with anonymised text, and  
44 use [...] to signify abridged quotes.  
45  
46  
47  
48  
49

50 In the sections that follow we refer to the three different types of PPI role, identified by our earlier  
51 analysis of informants' accounts of the impact of PPI on the trials (reported separately). The  
52 identified PPI roles were: oversight, typically characterised by the formal presence of a PPI  
53 contributor on the trial steering committee, with infrequent involvement; managerial, also usually a  
54 formal role but with more regular involvement, for example as co-investigator or member of the  
55  
56  
57  
58  
59  
60



1  
2  
3 trial management group; and responsive roles, which tended to be less formal, often with more than  
4 one contributor, or making use of advisory panels and focus groups as and when problems occurred.  
5  
6  
7  
8

## 9 10 **Results**

### 11 **PPI Plans: From intentions to actions**

12  
13 As illustrated in Figure 1, 28 trials were eligible for inclusion in the current analysis. We conducted  
14 interviews with both the CI and a PPI contributor in nine of the 28 trials, with the CI only in 12 trials,  
15 and with a PPI contributor only in seven trials. One PPI contributor was involved in two of the trials  
16 in this sample, while a further two trials had two PPI contributor interviews. We also conducted  
17 interviews with 10 TMs and consulted one of these transcripts where there was ambiguity in CI / PPI  
18 accounts regarding whether all plans for PPI had been implemented. Interviews lasted 45 minutes  
19 on average.  
20  
21  
22  
23  
24  
25  
26  
27  
28  
29  
30  
31  
32  
33  
34  
35  
36  
37  
38  
39  
40  
41  
42  
43  
44  
45  
46  
47  
48  
49  
50  
51  
52  
53  
54  
55  
56  
57  
58  
59  
60

Figure 1 EPIC trials eligible for analysis comparing PPI plans and implementation

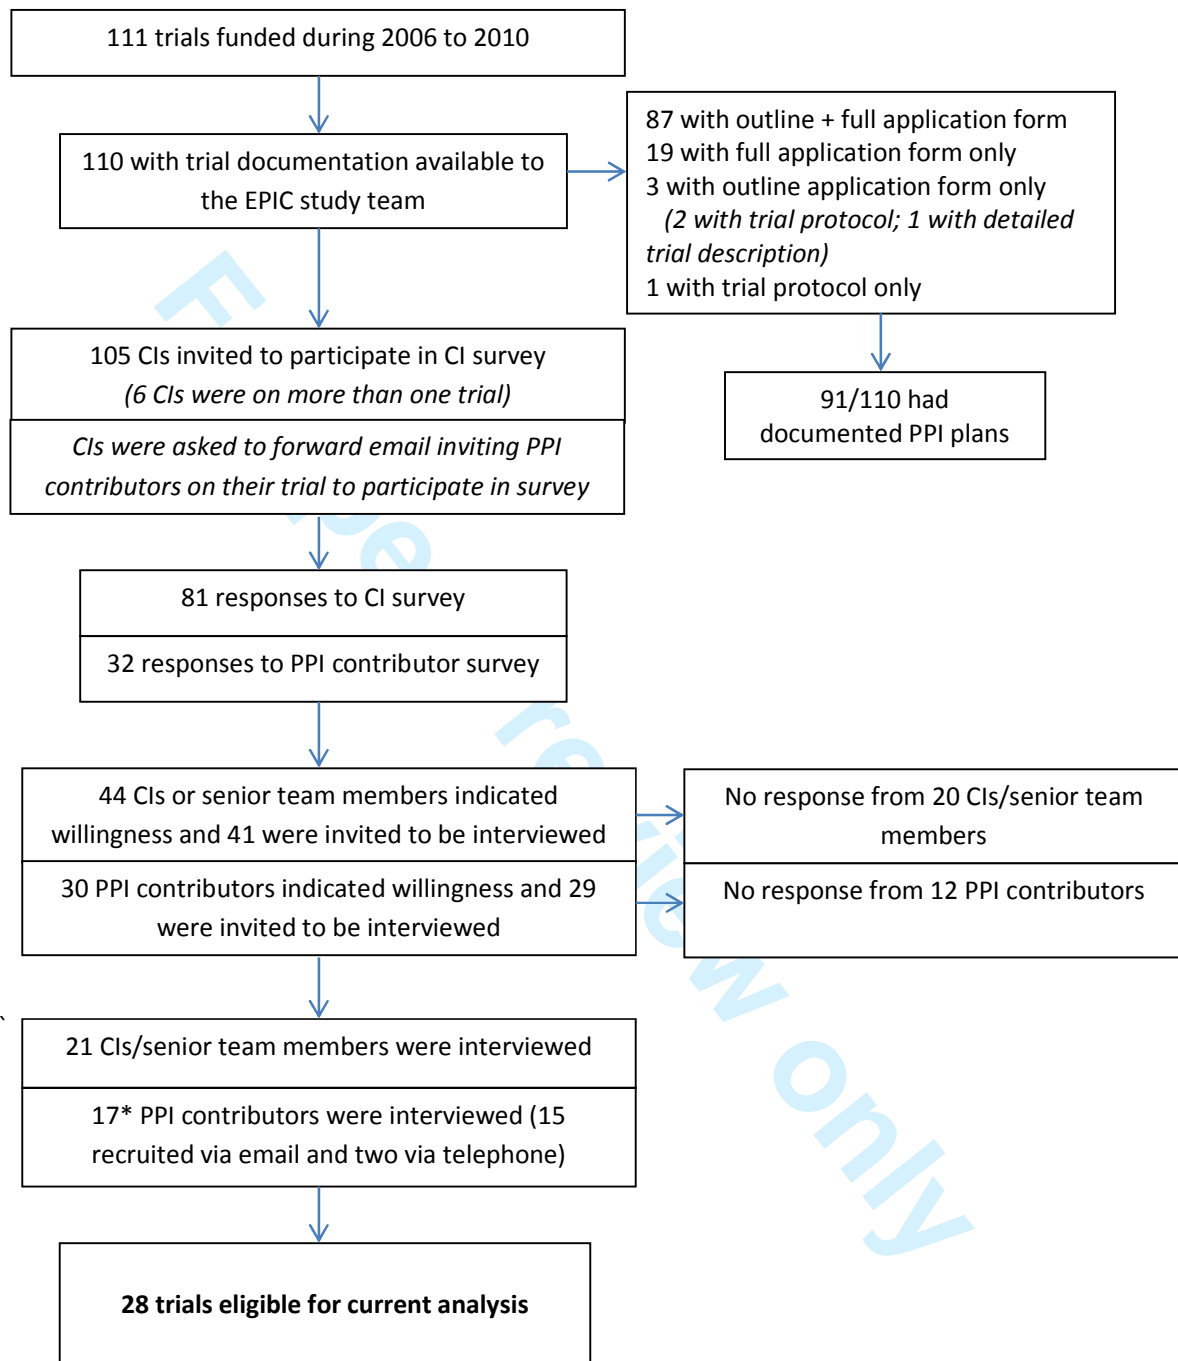

\*There were 17 contributor interviews for 17 trials, although one PPI contributor was in 2 trials while a further 2 trials had 2 PPI contributor interviews

1  
2  
3 As shown in Table 1, all but three of the 28 trials had documented plans for PPI in their grant  
4 application or protocol or both. These documents varied greatly regarding the extensiveness of PPI  
5 activity planned and precision with which plans were described, from vague references to activities  
6 that hinted at PPI, “We will make use of two primary care research networks and an [intervention-  
7 specific] research network” (Trial 115), to statements that were quite precise, “The [Society]  
8 confirmed their willingness to represent their members through steering committee membership  
9 [...] and to help in the construction of the MREC application and patient information leaflets” (Trial  
10 102). Based on informants’ interview accounts, all trials subsequently incorporated some form of PPI  
11 and it was clear from the interviews that documented plans were fully implemented in most (20/25)  
12 instances regardless of whether the plans were vague or precise, minimal, or extensive. The three  
13 trials without documented plans did proceed to include some PPI activity, perhaps prompted, to an  
14 extent, by comments from peer reviewers who had remarked on the lack of PPI plans in each case.  
15 This is particularly likely in Trial 2. Here, the grant application referred to pre-funding PPI and when  
16 interviewed the CI spoke of initial “tokenism” and “ignorance” about how PPI should work. A further  
17 three trials expanded on documented plans, giving a total of six trials which had seen addition or  
18 expansion of plans for PPI.  
19  
20  
21  
22  
23  
24  
25  
26  
27  
28

29  
30 Despite informants indicating that most of the documented plans for PPI had been implemented,  
31 some revealed no personal expectations for PPI and spoke of using it as a means of “ticking the right  
32 boxes”. This raises questions about the motivations behind the PPI plans in some grant applications.  
33 As noted, we had previously identified three types of PPI roles within our cohort of RCTs: oversight,  
34 managerial, and responsive,[20] and many trials built into their plans a combination of these roles.  
35 Based on informants’ accounts it appeared that six trials largely confined PPI to an oversight mode of  
36 involvement, although some had hinted at other modes in their applications. We begin by examining  
37 what happened in these trials.  
38  
39  
40  
41  
42  
43  
44

#### 45 **Oversight mode trials (n=6)**

46 Oversight mode trials were those which confined PPI input to membership of trial steering  
47 committees (TSC). Based on informant interview accounts, there were six trials that constrained PPI  
48 to this mode of involvement, although three of these had hinted at other modes in their  
49 applications. A further application had been too vague to discern the mode of planned PPI, and  
50 another had no documented plans for PPI (Table 1).  
51  
52  
53  
54  
55  
56  
57  
58  
59  
60

1  
2  
3 Based on informants' accounts, all trials which had documented plans for PPI membership on their  
4 TSC had implemented this aspect of the plans. Researcher interviews were available for four of these  
5 six oversight trials and of these four, only one researcher divulged any personal expectations for PPI  
6 in the trial. Moreover, informants' accounts raise concerns about the motivations for including PPI in  
7 their applications and the danger of assuming that contributors know what is expected of them. For  
8 example, Trial 36 had named a "patient representative" as a member of the TSC at the application  
9 stage then subsequently, in direct response to peer reviewer comments, the team had indicated that  
10 they would consider increasing the number of "patient representatives" on the TSC from one to two,  
11 in order to provide "mutual support". The team proceeded to include two PPI contributors on the  
12 TSC, thereby achieving their documented plans. Despite having prior experience of PPI however, the  
13 researcher divulged no personal expectations for PPI within this particular trial and referred to PPI as  
14 a 'tick box' exercise:  
15  
16  
17  
18  
19  
20  
21  
22

23  
24 "It was a requirement of... that we had representation on our steering committee and  
25 therefore I went through that [...] We can say [the PPI contributors] are there and therefore  
26 it's, if you like, ticking a political box." (CI 36)  
27

28 The documentation for Trial 2 included no plans for PPI during the trial but did state that there had  
29 been "several stages of user involvement" prior to the grant application, "to confirm that the  
30 research question is pertinent to both the needs of the NHS and the NIHR programme of research  
31 development". Two grant reviewers commented on the lack of "service user representation" on the  
32 team and suggested membership "on the research team or steering group". The TSC did include PPI  
33 membership but during the interview the researcher spoke of his initial "tokenism" and "ignorance"  
34 about how PPI "should and could work". When asked about the expectations of their role, the PPI  
35 contributors in two other oversight trials (115 and 96) implied similar uncertainties when they spoke  
36 of not knowing what was expected of them and of feeling "bewildered" in meetings:  
37  
38  
39  
40  
41  
42  
43

44 "I can't understand why they use me... they seem to find me useful but I just sit there  
45 bewildered. I'm there as a sort of grey background while the others do all the sparky stuff."  
46 (PPI 115)  
47  
48

49 In the next section we describe planned and implemented PPI in 14 trials which incorporated a  
50 managerial role of PPI. Unlike the six trials with a mainly oversight mode, many of the managerial  
51 mode trials had utilised more than one form of PPI.  
52  
53  
54

#### 55 **Beyond oversight, into managerial mode (n=14)** 56 57 58 59 60

1  
2  
3 Most of these 14 trials had indicated some type of managerial involvement in the documented  
4 plans, usually to include PPI contributors as co-investigators (Table 1). Two trials (4 and 27) did not  
5 have PPI contributors as co-investigators but planned to include PPI contributors on the trial  
6 management group, and interviews with informants indicated that this had been implemented. It  
7 was unclear in one ongoing trial whether there was a PPI co-investigator, but documented plans  
8 stated that a named PPI collaborator would be "directly involved in decision making of trial  
9 processes and then relay back information to user groups"; according to the PPI contributor  
10 interview these plans were being implemented (Trial 18). Trial 10 had no documented plans for PPI  
11 but the interview with the CI indicated that there was a PPI co-investigator (Trial 10).

12  
13  
14 Informants' accounts indicated that all trials which had planned a managerial mode of PPI did  
15 implement it (Table 1). This included Trial 21, which had a PPI co-applicant and documented plans to  
16 involve user groups in developing information leaflets, consent forms, letters, and in questionnaire  
17 design. There was a budget for PPI travel and expenses which is perhaps indicative of careful  
18 planning. The documented plans stated that "user and consumer groups were very keen that a user  
19 was a collaborator on the grant application". The applicants also planned and included oversight PPI  
20 (TSC membership) and expanded beyond their plans to include contributors in recruitment, in the  
21 analysis and interpretation of results, and in dissemination. Although we could not pinpoint from the  
22 informant interviews exactly what prompted these additional PPI activities, the PPI contributor who  
23 we interviewed described his extensive previous experience in similar roles and noted that his role in  
24 this particular trial had "evolved". He also explained that "I'm there because I want to change things"  
25 (PPI 21) and this pro-active approach may have contributed to the expansion of PPI in this particular  
26 trial. Correspondingly, the CI spoke of wanting the PPI contributors to "feel welcomed and valued as  
27 part of the group", and had personal expectations for PPI that included PPI contributors helping with  
28 "running the study", "disseminating the results" and that "they would stay involved" and "feel able  
29 to speak out and have their own opinion":

30  
31  
32  
33  
34  
35  
36  
37  
38  
39  
40  
41  
42  
43  
44  
45  
46  
47  
48  
49  
50  
51  
52  
53  
54  
55  
56  
57  
58  
59  
60  
"We wanted them to offer to do things that they felt they could do and feel happy to say if  
they didn't feel they could do certain things that might come their way." (CI 21)

There were several examples akin to this among trials incorporating a managerial mode of PPI, in  
which CIs reported having personal expectations for PPI or in which PPI contributors appeared to be  
an integral member of the research team. However, one of two exceptions was Trial 14, in which  
documented plans had been to involve a PPI co-applicant "with an academic interest in representing  
patients' perspectives in the design and conduct of health care research", adding that this individual

1  
2  
3 would advise on “the development of processes and materials which take into account patient  
4 concerns”. Responses to the CI survey described the PPI contributor as “a serial patient  
5 representative”. When interviewed, the CI divulged no personal expectations regarding PPI  
6 contribution, describing it as a “tick box exercise:  
7  
8  
9

10 “The funders were insistent on having patient representation and wanted to know what that  
11 representation was on your grant submission.” (CI 14)  
12  
13

14  
15 In summary, most trials which planned a managerial mode of PPI implemented it. However, as Trial  
16 14 shows, simply having a PPI co-investigator is not necessarily a guarantee of meaningful  
17 contribution if researchers have no expectations for PPI or if contributors are unable to provide the  
18 input that a particular trial requires, for example because they are selected out of convenience  
19 rather than to match trial needs. In the next section we focus on the less formal, responsive, form of  
20 PPI in which researchers “reach out” for specific PPI input as and when needed.  
21  
22  
23  
24  
25  
26

#### 27 **“Reaching out” - responsive roles (n=14)**

28

29 Fourteen trials embraced some form of responsive involvement, although trial documents for two  
30 (10 and 79) had not indicated any plans for PPI (Table 1). The remaining 12 had stated in their  
31 documented plans that they would, or already did, engage with PPI groups or panels rather than just  
32 with the one or two individuals that was typical of oversight and managerial PPI. Data from  
33 application forms, project descriptions and informant interviews showed that this responsive activity  
34 sometimes entailed seeking advice from PPI groups prior to the application for funding. Informants  
35 noted that many trialists continued to seek advice from such groups during the trial regarding  
36 specific issues. Other trials began a responsive approach once the trial had commenced, often as and  
37 when particular problems arose. Most trials implemented all aspects of their documented plans but  
38 in one case (Trial 76) it was unclear from the CI interview whether specific plans to seek advice of a  
39 new advisory group before recruitment were implemented.  
40  
41  
42  
43  
44  
45  
46  
47

48 Trial 20 used responsive alongside managerial PPI, including having a PPI co-applicant. The trial had  
49 ended at the time of the interviews, and the researcher stressed that the responsive PPI had been  
50 “crucial” when faced with specific problems. The CI explained that one PPI contributor would attend  
51 research team meetings:  
52  
53  
54  
55  
56  
57  
58  
59  
60

1  
2  
3 “but I then reached out to other people in addition when we needed more help [...] I think  
4 what was crucial was being able to get input, not in terms of regular intervals but [...] when  
5 you’ve got a problem.” (CI 20)  
6

7  
8 Further illustrating the flexibility that responsive PPI allows, in her interview one of the PPI  
9 contributors on the same trial (who on this particular trial had a managerial role), advised  
10 researchers to “have some understanding” of the needs of PPI contributors. She then went on to  
11 refer to another contributor on the same trial who did not attend project meetings but who  
12 operated in a more responsive mode outside of meetings. It appeared this arrangement had evolved  
13 to accommodate the needs of the latter contributor, who, it seemed, found meetings difficult.  
14  
15

16  
17  
18  
19 “She didn’t really know what to do, so I think it was much more a one-to-one conversation  
20 which is what she was happy with rather than sitting in a committee.” (PPI 20)  
21

22  
23 Documented plans for Trial 7 involved a combination of oversight, managerial and responsive  
24 modes. This trial was collecting outcome data at the time of the researcher interview, and PPI plans  
25 were being implemented including consultation with a panel of service users who advised on issues  
26 such as how to increase participant response rates to the outcome questionnaire, and on the  
27 promotional material that accompanied it. When interviewed, the researcher spoke of her personal  
28 expectations that PPI would help to maximise recruitment, ensure the right outcomes were  
29 measured, and help in interpreting the findings. There was no PPI contributor interview but the  
30 researcher also spoke of having to tailor “different ways of involving people” in PPI depending on the  
31 “population of interest”:  
32  
33  
34  
35  
36

37  
38  
39 “It might be children, people from disadvantaged groups or older people [...] so you  
40 probably have to find other tailored ways of including people to make it effective. So it’s not  
41 a one size fits all.” (CI 7)  
42

43  
44  
45 The majority of those researchers interviewed who described such ‘as and when’ contributions  
46 (10/12) spoke of expectations for PPI, and tended to view responsive modes as constructive. Only in  
47 one case (Trial 101) did the researcher allude to the PPI within their trial as a “tick box” exercise.  
48  
49

50  
51 Three trials undertook additional responsive PPI activity that had not been specified in their  
52 documented plans. Trials 21 and 102 expanded on their plans by involving PPI contributors in a  
53 broader range of activities than initially indicated, namely advising on recruitment and interpretation  
54 and dissemination of study findings. As with Trial 21 (described in the Managerial Mode section  
55 above), we could not determine from the CI interview why plans for Trial 102 had been expanded  
56  
57  
58  
59  
60

1  
2  
3 upon, and there was no PPI contributor interview for Trial 102 to help illuminate this issue. The PPI  
4 contributor for the third trial (Trial 91) mentioned that she sought the views of “women’s groups”.  
5 This was additional to the documented plans for her to be involved in “protocol design of the study”.  
6  
7 As with Trial 21, this PPI contributor had previous PPI experience and appeared to be a particularly  
8 active member of the research team, and with considerable knowledge of the relevant health  
9  
10 condition.  
11

12  
13  
14 In summary, most applicants implemented their documented plans for PPI regardless of the mode of  
15 planned involvement. In five cases we were unable to discern whether or not PPI plans were fully  
16 implemented, although some PPI was achieved in these trials. Regardless of whether PPI was  
17 implemented as planned or evolved, most trial teams faced challenges and learnt lessons about  
18 implementing PPI as they went along. We now turn to their accounts of this learning and then use  
19 these to derive practical advice for planning and implementing PPI.  
20  
21  
22  
23  
24

### 25 **Researchers on the challenges of PPI and lessons learnt**

26  
27 Most CIs spoke of the challenges they encountered in implementing PPI (Table 2) and things they  
28 would do differently as a result. The involvement of trial investigators’ own patients as contributors  
29 was perceived to lead to a “conflict” (CI 20) between an investigator’s research and clinical roles.  
30 This brought a risk that research would “cross over into clinical care” (CI 6), and that such  
31 contributors would be “out of their depth” (CI 20) and find it difficult to “say something which might  
32 imply a criticism of their clinician” (CI 20). CIs talked about the problems of failing to engage PPI  
33 contributors fully or early enough to inform changes in study design, and “under-utilising” (CI 101)  
34 PPI contributors by not involving them in the planning stages, thereby making PPI less thorough or,  
35 as one informant noted, less “robust” (CI 101). They reflected on the potential detrimental  
36 consequences of such failings on the relationship between researcher and PPI contributors, for  
37 example being less likely to “form a bond and get loyalty” (CI 14). Finding and engaging the right  
38 people with an interest in and understanding of the research, and with the necessary confidence,  
39 commitment and impartiality was another major stumbling block:  
40  
41  
42  
43  
44  
45  
46  
47  
48

49  
50 “You hear that some consumers get involved [...] because they have a particular point of  
51 view or axe to grind [...] in those circumstances it could be very detrimental to a trial, to be  
52 driven by somebody who has had a bad experience [...] and those are the ones you don't  
53 want on your team. (CI 5)  
54

55  
56 “You’ve got trialists in the [meeting] who are trained to run clinical trials. And then you’ve  
57 got one lay representative who may be slightly intimidated by everyone else, who’ll not be  
58 able to truly give their views, may be slightly overawed.” (CI 14)  
59  
60



1  
2  
3  
4  
5  
6  
7  
8  
9  
10  
11  
12  
13  
14  
15  
16  
17  
18  
19  
20  
21  
22  
23  
24  
25  
26  
27  
28  
29  
30  
31  
32  
33  
34  
35  
36  
37  
38  
39  
40  
41  
42  
43  
44  
45  
46  
47  
48  
49  
50  
51  
52  
53  
54  
55  
56  
57  
58  
59  
60

Researchers also pointed to the practical difficulties that contributors experienced in attending meetings due to geographical distance or time constraints (Table 2). They emphasised how teleconferences could be less conducive to forming a relationship with PPI contributors than face-to-face meetings. They also reported problems relating to communication and mutual comprehension between themselves and PPI contributors. Some described PPI contributors as struggling to understand the nature of research, or the distinction between research and clinical practice, and one CI referred to his own “naivety” (CI 55) in underestimating how much training PPI contributors might need. CIs described difficulties getting other staff such as trial managers to understand or prioritise PPI. This included one CI who noted that some investigators are unable to “cope” with having a “working relationship with service users” and “can’t let go of the fact that [they] are people they study”:

“It’s a mindset [...] an attitude where you have an equal partnership. You’re working together not studying these people. You’re asking for their expertise and I’ve found that some people who’ve worked with me, that comes easily and some people absolutely never get it.” (CI 20)

CIs remarked that they were unclear about what to expect in relation to PPI and worried about taking up the contributor's time. External forces also played a part in some cases: for example one CI described PPI contributors being “poached” by other studies, a “fight” with the university regarding paying a PPI contributor for his time, and disagreement with funders when a contributor wanted to add to the patient information sheet that he was a PPI contributor on the project (CI 21).

CIs spoke of how they had learnt as the trial went along, revealing that their “practice had evolved” (CI 14) and their skills had “changed beyond recognition [...] now we’re much better equipped [...] but at the time when [trial] started we had very little idea at all about what PPI involved or how it would help or how it would work” (CI 2).

In light of these challenges, CIs spoke of how in future they would involve more than one PPI contributor, in particular by using focus groups or panels of contributors rather than individual contributors, enlist the help of relevant charities, and conduct surveys or use social media when there was a “burning question” (CI 55). Use of responsive PPI rather than individual contributors was described as “gold standard” PPI (CI 14), as this avoided “the danger of having a single opinion” (CI 76), provided structure for all parties, and helped to enhance the confidence of individual contributors.

1  
2  
3  
4  
5 "I would certainly have more involvement and some kind of framework around it [...] a small  
6 user group and set boundaries [...] try to agree how often we should meet and what peoples'  
7 roles and responsibilities are [...] and provided more structure [...] to make them feel that  
8 their views are important, and their involvement is very important, I think that would go a  
9 long way to easing the process." (CI 41)  
10

11 Many CIs indicated that they would extend PPI in future by asking contributors to lead in the  
12 dissemination of findings to relevant groups, help in the development of research questions, study  
13 design, and involve PPI contributors as co-investigators. CIs placed particular emphasis on how  
14 "crucial" it was to have "early input" (CI 14):  
15  
16  
17  
18

19 "The most useful things are [...] the design stage [...] RCTs you've got to plan ahead [...] after  
20 the development phase you shouldn't really be changing anything [...] it is during that  
21 development phase when decisions are being made." (CI 115)  
22

23 "Early engagement and appreciation that their input into the question is really important [...] with  
24 retrospect and for the future studies [...] more involvement at the front end, less in the  
25 middle and more at the end." (CI 2)  
26  
27  
28

29 Finally, CIs reflected on the importance of "thinking through" plans and being clear about whether,  
30 what and why PPI is needed for individual trials:  
31  
32

33 "Be clear about the link between particular methods [of PPI] and particular benefits and  
34 challenges [...] it's not all the same, there are so many ways of doing it but you have to have  
35 good reasons for choosing how to do it." (CI 20)  
36

37 "I don't think it should be automatic that there must be PPI involvement in every study, and  
38 different types of involvement are necessary for different parts of study. Having a core  
39 group is not necessarily the right thing because at different points there are different types  
40 of people and types of involvement that would be useful." (CI 10)  
41  
42  
43  
44  
45  
46  
47  
48  
49  
50  
51  
52  
53  
54  
55  
56  
57  
58  
59  
60

### Contributors on the challenges of PPI and suggestions for improvement

Most PPI contributors mentioned challenges or difficulties linked to their involvement in the trial which may inform future research teams in planning and implementing PPI. Some of the contributors' challenges paralleled CIs' accounts while others were unique to the contributors (Table 2). While researchers referred to problems they had experienced in their communication with contributors, a prominent issue exclusively mentioned by contributors related to the problems they experienced with 'jargon' and the technical language that was used in trials such as statistical or medical terminology and acronyms. Several contributors suggested remedies such as supplying a list of acronyms or a booklet of research terms, or simply that "if they're going to use jargon, explain it" (PPI 64). A further idea was that the person chairing meetings could try to ensure that discussion about statistical issues or other areas of technical expertise were translated and summarised adequately. Contributors talked about difficulties in interacting with researchers, including not always feeling listened to by everyone. One contributor who had been invited by her consultant and had previous experience of PPI implied that "some doctors" were unwilling to understand the perspectives of patients (PPI2 27). Another felt that female researchers were more understanding than males regarding problems with travelling or feelings of insecurity, while a further contributor alluded to how in meetings the team sometimes talked about patient experiences in a "dispassionate" way, and although this was not a problem for the individual contributor she felt it might be for others (PPI1 27).

Some of the challenges that contributors described echoed those that the CIs has raised. These included lack of clarity about roles, and the difficulties contributors experienced in attending meetings, for instance because of a health condition. Such practical difficulties could give rise to additional complexities. For one contributor, infrequent meetings meant "not much to build a relationship on" and while academics worked closely together, she had to "work quite hard to keep up" (PPI 16). Contributors also talked about wanting to be more involved in between annual meetings, in "shaping the bid" (PPI 20) so that it was less focused on the primary clinical outcome, in seeing the intervention itself, and to have initial briefing meetings at the outset of their involvement. Finally, one contributor described it as a "downfall" that he was not receiving feedback or 'thank you's' and commented on how important it was to make PPI contributors "feel valued" (PPI 34).

## Discussion

### Main findings

*The path to PPI: plans, actions and complications*

1  
2  
3 This is the first study to examine whether plans for PPI, as documented in RCT grant applications, are  
4 being implemented. Based on the accounts of researchers and PPI contributors we found that most  
5 trialists are indeed putting their plans to action, although in some cases the plans were minimal and  
6 relatively easy to execute. There were a few trials for which we were unable to confirm whether  
7 plans were implemented in full, but all did incorporate some PPI. Many trials implemented multiple  
8 modes of PPI, which is both surprising and encouraging given that PPI was less prominent when the  
9 proposals for the trials in this cohort were being developed. CIs encountered complications from  
10 which they learnt valuable lessons. Uncertainty about what to expect of PPI and emergent  
11 challenges with their trials meant that involvement had to evolve. Difficulties finding and retaining  
12 suitable contributors and engaging in PPI 'too little too late' led trialists to say they would do things  
13 differently in future. Many reflected on how they would aim for earlier engagement next time and  
14 seek involvement from a more diverse source such as patient panels or focus groups. PPI  
15 contributors themselves mentioned that becoming involved after the trial had begun, or  
16 infrequently, resulted in missed opportunities for them to contribute. Some referred to uncertainty  
17 about their role and many struggled with jargon, an enduring problem despite the availability of  
18 apparently straightforward solutions.

### 30 *Pressured into PPI?*

31  
32 Regardless of statements about PPI in their funding application some trialists had no expectations of  
33 what PPI might achieve, and their only motivation for including PPI was a belief that it was necessary  
34 or would help to secure funding for their trial. Such strategic minimalism may be an inevitable side-  
35 effect of policies to promote or require PPI in trials. It may also reflect researchers' professed  
36 inexperience of PPI. A small number of trials did not have documented plans for PPI but all did  
37 nevertheless include some PPI, possibly influenced by reviewer and panel comments. However, one  
38 of these trials had been through several stages of PPI prior to the grant application and was  
39 requested to implement further PPI over the course of the trial. This highlights the predicament of  
40 researchers whose trial may have benefited from considerable PPI prior to funding (for example in  
41 feasibility and pilot work) and forecast that they would need relatively little PPI during the trial itself,  
42 only to find that funders insist on PPI at all stages. Many informants believed formative PPI prior to  
43 funding was one of the most useful, credible aspects of PPI. Particularly in cases where there has  
44 been extensive PPI prior to the main trial, it is important for all members of the research community  
45 to consider whether plans for ongoing PPI match the needs of a particular trial and at what stage(s)  
46 further PPI would be appropriate.

### Previous research

We found no previous reports on the extent to which documented plans for PPI within trials were subsequently implemented. There have been several accounts of challenges involved in implementing PPI which, while not in a trials context, endorse our findings. For instance, recent reports have referred to tokenism,[24] or highlighted the potential challenges in identifying suitable individuals who are impartial and able to understand research methodologies, retain an interest, and commit long-term;[15 17-19 25] of researchers having little experience of PPI and being uncertain about what to expect;[15 18] and of jargon-related problems.[19 26 27] INVOLVE suggest that PPI contributors would benefit from a 'glossary of technical terms',[17] again something reflected in the suggestions from contributors within our study. Staley[4] refers to the challenge of ensuring that involvement is meaningful and not simply tokenistic. The timing of involvement has been recently highlighted[3 28] and is clearly an ongoing challenge which is exacerbated by financial and time constraints[8 26] particularly during the grant-writing stage.

### Study limitations

We used a historical cohort of trials that had been funded four to eight years ago. Even in that short time the emphasis on PPI has grown and our findings may not reflect the planning and implementation of PPI in trials funded more recently. Some of the trials in our sample were also initiated and completed some time before the interviews. However, this limitation is offset somewhat by the inclusion of ongoing trials in which PPI activity was more recent and therefore easier to recollect. There were five trials for which it was not possible to determine whether all documented PPI plans had been fully implemented or not. In some cases informants clearly struggled to recall events for trials which had ended several years previously or where researchers were involved in a number of trials simultaneously. We explored with informants how PPI contributors were involved in the trials but did not directly quiz CIs about why certain plans within their application were not implemented. This was intentional as we did not want to pose questions which may have seemed accusatory and have a detrimental impact on the rapport between informant and interviewer or risk informants becoming defensive. While some trialists seem to have expanded on their plans for PPI once the trial was underway there may, conversely, have been instances in which plans were not fully documented within the grant application.

### Implications and tips for the trials community

We have used the insights of informants to generate practical tips which may help future trialists and PPI contributors (Box 1). These cover the importance of early planning, of timely and flexible PPI,

1  
2  
3 and of communication and clarification of roles. They also stress the need to consider the difficulties  
4 posed by the use of “jargon”, and problems contributors experience in understanding certain  
5 aspects of the research process. The difficulties contributors experience with specialist or technical  
6 terminology have been widely reported. [19 26 27] Our data suggest that this problem has existed  
7 for some considerable time, and we outline the practical solutions suggested by PPI contributors.  
8 The tips in Box 1 could be used to inform PPI training and could be helpful in other types of health  
9 research. They might also assist funding bodies and grant reviewers in determining whether  
10 submitted plans are fit for purpose. A study of the UK health and social care research community has  
11 recently informed the development of a Public Involvement Impact Assessment Framework (PiiAF),  
12 which emphasises the value of well thought-through planning before implementing PPI,[29] and  
13 INVOLVE[17] have emphasised the importance of clear guidance about roles. However, researchers  
14 also need some scope for flexibility and contingency in planning PPI: our finding that some trialists  
15 expanded their sometimes already detailed plans supports the need for flexible and iterative  
16 approaches to PPI in order to accommodate the unexpected and respond to opportunities and  
17 difficulties as they arise.  
18  
19  
20  
21  
22  
23  
24  
25  
26  
27  
28  
29  
30  
31  
32  
33  
34  
35  
36  
37  
38  
39  
40  
41  
42  
43  
44  
45  
46  
47  
48  
49  
50  
51  
52  
53  
54  
55  
56  
57  
58  
59  
60

**Box 1 Tips for planning and implementing PPI in clinical trials****Early PPI***"You've got to plan ahead"*

- Begin planning PPI and consulting with contributors when starting to plan the trial
- Consider including PPI contributors in managerial roles e.g. as co-investigators

Researchers and PPI contributors emphasised how early and regular involvement allowed contributors to input more effectively. PPI prior to the trial (for example in contributions to grant writing, trial design, feasibility studies) was a key aspect of PPI, and in some cases the most important one.

**Flexible PPI***"One size does not fit all" "Reaching out was crucial"*

- Consider whether oversight PPI (e.g. on a TSC) is sufficient to meet trial needs
- Involve more than one or two PPI contributors, more than once or twice a year
- 'Reach out' and make use of multiple modes of PPI, including responsive PPI

PPI is context-specific so it is important to tailor PPI to the emergent needs of trials and be creative to encourage active engagement. Researchers felt that involving contributors beyond an oversight role, i.e. not just as a member of the steering committee but in a managerial or responsive capacity helped to foster meaningful PPI. In terms of responsive PPI, liaison with relevant patient panels or groups may be particularly helpful when more diverse perspectives or wider consensus is needed; consider whether surveys (e.g. of support group members) would be useful in answering 'burning questions, or qualitative research to gain deeper understanding.

**Communication, clarification, and interaction***"I can't understand why they use me. I just sit there bewildered"*

- Negotiate with contributors at an early stage about what they can bring to the trial and what they want to bring
- Determine whether this matches the trial's needs and clarify roles and expectations
- Be sensitive to contributors' needs and preferences

Communication between researchers and PPI contributors is crucial at the outset to clarify roles and expectations, and throughout the trial to optimise engagement and provide feedback about contributions. It may be that particular contributors do not have the insights a trial needs, or maybe trialists need to rethink their plans for PPI in the light of experience. Researchers should avoid seeming "dispassionate" during meetings when discussing a particular illness or condition that impacts on the lives of PPI contributors, and make a genuine effort to understand contributors' points of view.

**Language of research***"Break it down into a language everybody understands."*

- Minimise and explain jargon
- Provide glossaries and 'translations' where applicable

Researchers and contributors should discuss their written and verbal communication preferences and how to minimise and explain jargon. Suggestions for minimising jargon included lists of acronyms or

glossaries of research terms. PPI contributors should be prepared to speak up if there is a problem and, with the help of researchers, be willing to acquaint themselves with specialist terms over time.

### **Budgeting for PPI**

*"University didn't want to pay him the money" "We had- money in the pot but only for one PPI"*

- Budget for PPI – think about contributors' time plus expenses
- Explore opportunities for pre-trial support for PPI

Well thought-through plans will help inform how much to 'cost in' for PPI. Consult with administrators in your organisation at an early stage to iron out processes for payments to PPI contributors. Talk to contributors to make sure they will be happy to accept reimbursement beyond expenses. Find out whether there are any local or national resources to support PPI prior to funding applications.

### **Fit for purpose PPI**

*"The person we chose had very little engagement, it struck me as a complete waste of time"*

- Agree what types of PPI would be appropriate and understand why
- Consider benefits of involving those with experience of the condition
- Recognise potential drawbacks of involving those under current care of the researcher

Think through plans for PPI and centre them round the aims and needs of the trial. Agreement about and understanding of *what* and *why* PPI is needed will help in planning it. Involving people with experience of the condition, intervention or service where applicable may be particularly germane in identifying research priorities and enhancing trial design. However, the inclusion of patients under the current care of a team member may lead to difficulties for both researchers and contributors.

### **Ticking several boxes could equate to expensive token gestures: Implications for funders**

Our findings endorse recent revisions to the NIHR's standard application form, which now require applicants to clearly define their proposed PPI activity. Asking researchers to specify and explain the type of involvement they envisage and what they expect it to achieve is a step in the right direction and should help to minimise "tick box" tactics and token gestures. However, the risk of strategic minimalism remains if plans are not afforded careful, context-specific consideration by funders and reviewers. Equally, there is a risk of inadvertent PPI profligacy, that is, the encouragement of elaborate plans for PPI that are disproportionate to the needs of a trial. Ticking several boxes rather than just one box could equally be a token gesture, as well as an expensive one. Therefore, researchers might be encouraged to think just as much about *why*, *how* and *when* PPI as about *what* and *how much* PPI.

Researchers are also now asked to describe, in their grant applications, any PPI activity that they have undertaken prior to submitting the application. Funding is available to support pre-application



1  
2  
3 PPI, for example the UK-based NIHR Research Development Service offers very small grants, but  
4 these are not easily or quickly accessible, particularly for those working to the typically tight  
5 deadlines of funding calls. Paradoxically, this renders pre-application PPI the most difficult to  
6 implement, even though it is potentially the most useful type. Innovative organisations that involve  
7 patients at a meta-trial level in research priority setting  
8  
9  
10  
11 [http://www.lindalliance.org/Patient\\_Clinician\\_Partnerships.asp](http://www.lindalliance.org/Patient_Clinician_Partnerships.asp) and in schemes such as COMET  
12 (Core Outcome Measures in Effectiveness Trials)[30 31] which promotes the involvement patients in  
13 developing “core outcome sets”, are providing knowledge and resources that individual trials can  
14 use. However, at the level of individual trials infrastructural support for early PPI is also needed.  
15  
16 While there have been innovations in this area, for example the US-based Patient-Centred Outcomes  
17 Research Institute has recently announced a number of ‘Pipeline to Proposals’ Engagement  
18 Awards,[6] such moves are relatively novel, and similar steps by other organisations would be  
19 beneficial. As well indicating the need for structures and resources to support PPI, our findings point  
20 to the importance of PPI that is fit for purpose, realistic and proportionate. We found that trialists  
21 who fully implemented a primarily oversight mode of PPI perceived little value in this involvement –  
22 a related article from our study will fully explore the perceived impact of PPI in this cohort. While  
23 oversight PPI seemed limited in terms of its practical impact, arguably it may serve important ethical  
24 and moral functions. However, in order to avoid inadvertently promoting PPI that is devoid of any  
25 function for both researchers and contributors, as we note above, funders should take full account  
26 of any PPI which has taken place prior to funding applications as well as encourage applicants to  
27 justify future plans for involvement. The NIHR HTA programme states: “*While patient and public  
28 involvement (PPI) may not always be needed for all types of research, it is always relevant for HTA  
29 trials.*” [http://www.nets.nihr.ac.uk/\\_data/assets/pdf\\_file/0003/77160/Preparing-a-full-application-  
30 for-the-Clinical-Trials-and-Evaluation-Board.pdf](http://www.nets.nihr.ac.uk/_data/assets/pdf_file/0003/77160/Preparing-a-full-application-for-the-Clinical-Trials-and-Evaluation-Board.pdf) (last accessed 09 March 2014). Even if there is  
31 consensus that PPI is relevant for all trials, it may not be relevant at all stages of all trials.  
32  
33  
34  
35  
36  
37  
38  
39  
40  
41  
42  
43  
44

45 Our findings add fuel to recent drives and initiatives to promote the assessment and reporting of PPI  
46 processes[6 24 25] [http://www.journalslibrary.nihr.ac.uk/authors/report-preparation/report-  
47 contents/14](http://www.journalslibrary.nihr.ac.uk/authors/report-preparation/report-contents/14) including the GRIPP checklist.[32] The CONSORT (Consolidated Standards of Reporting  
48 Trials) Statement, which was established to encourage adequate reporting of RCTs, does not cover  
49 PPI. We suggest that PPI should be incorporated into the CONSORT checklist, perhaps as an  
50 “extension” to the full Statement. If, in planning their PPI, trialists are prepared to consider and  
51 report its outcomes not only in terms of what happened and how, but also how this matched the  
52 needs of the trial, whether any complications arose or adaptations were made, and what lessons  
53  
54  
55  
56  
57  
58  
59  
60

1  
2  
3 were learnt, then the evidence base will grow and the research community as a whole can learn. The  
4 EPIC project has highlighted the value of listening to the accounts of PPI contributors as well as  
5 researchers, and this should feed into the evaluation and reporting of PPI.  
6  
7  
8

### 9 **Conclusions**

10 While most trialists fully implemented their documented plans for PPI there were traces of a  
11 minimalist approach. Planning and engaging PPI contributors early, and beyond a primarily oversight  
12 role, seems to be the most salient message from this analysis. At the same time some degree of  
13 flexibility within plans is prudent, and making allowances for the unexpected may help all  
14 stakeholders to make the most of PPI. The involvement of investigators' current patients as PPI  
15 contributors should be given cautious consideration as there is the potential for conflict between  
16 clinical and research roles. PPI activity prior to funding is as integral to meaningful involvement as  
17 PPI activity during trials, and more so in some cases. Proper and flexible planning by research teams  
18 will be instrumental in helping them to monitor, adapt and report PPI during and after trials, and in  
19 helping the research community as a whole learn how to optimise PPI.  
20  
21  
22  
23  
24  
25  
26  
27  
28  
29  
30  
31  
32  
33  
34  
35  
36  
37  
38  
39  
40  
41  
42  
43  
44  
45  
46  
47  
48  
49  
50  
51  
52  
53  
54  
55  
56  
57  
58  
59  
60

**What is already known?**

\* PPI is becoming an expectation and often a pre-requisite for research funding and favourable ethical opinions

\* While the evidence base for PPI has recently grown, many unknowns remain, particularly in relation to PPI in clinical trials

\* There has been no systematic investigation of the extent to which documented plans for PPI in trials are ultimately put into practice, the challenges faced along the way, or subsequent lessons learnt

**What does this study add?**

\* In our study of funded clinical trials, almost all put their documented plans for PPI into practice

\* Trialists learnt that a chiefly oversight role and late initiation of PPI were often inadequate and that involving current patients of the trial team as PPI contributors can be problematic

\* PPI activity prior to, and alongside the development of, grant applications should be more widely acknowledged, encouraged and resourced

\* Trialists' plans for PPI will benefit from built-in flexibility in order to undertake 'as and when', purposeful engagement

**Department of Health Disclaimer:**

The views and opinions expressed therein are those of the authors and do not necessarily reflect those of the HS&DR, NIHR, NHS or the Department of Health.

**Acknowledgements**

We acknowledge the help and support of the NIHR HTA in establishing the cohort documentation. Alison Allam, Philip Bell, Heather Goodare and Alison Walker formed the EPIC Patient Advisory Group. All members commented upon the interview schedules and manuscript. We also acknowledge the late Neil Formstone, former member of the advisory group.

**Competing interests:** All authors have completed the ICMJE uniform disclosure form at [www.icmje.org/coi\\_disclosure.pdf](http://www.icmje.org/coi_disclosure.pdf). BH reports grants from the National Institute for Health Research, during the conduct of the study. BH received personal fees from NIHR, the Medical Research Council, and the User Involvement Shared Learning Group. DB, LD, CG. JP and PW have nothing to disclose.

**Transparency declaration:** the lead author (the manuscript's guarantor) affirms that the manuscript is an honest, accurate, and transparent account of the study being reported; that no important aspects of the study have been omitted; and that any discrepancies from the study as planned have been explained.

**Funding:** The study was jointly funded by NIHR HS&DR and INVOLVE (project number 10/2001/29). The study was conducted independently of the funders and competing interests have been declared. The University of Liverpool were sponsors of the project.

**Copyright:** the Corresponding Author has the right to grant on behalf of all authors and does grant on behalf of all authors, an exclusive licence (or non-exclusive for government employees) on a worldwide basis to the BMJ Publishing Group Ltd to permit this article (if accepted) to be published in BMJ editions and any other BMJ PGL products and sublicenses such use and exploit all subsidiary rights, as set out in our licence.

**Data sharing statement:** no additional data available.

**Author contribution statement:**

Deborah Buck was involved in conducting qualitative data analysis and interpretation, and writing the manuscript.

Carrol Gamble conceived the idea for the research, led the development of the grant application and project, developed the interview schedules, contributed to interpretation, reviewed drafts of the manuscript, and agreed the final version of the manuscript.

Louise Dudley was involved in developing the interview schedules, recruiting informants to the study, conducting the qualitative interviews, interpreting the findings, reviewing drafts of the manuscript and agreeing the final version of the manuscript.

Jennifer Preston contributed to the project specification, development of the interview schedules, interpretation of the findings, commented on the manuscript and led the coordination of the EPIC Patient Advisory Group.

Bec Hanley contributed to the project specification, commented on the manuscript and co-led the coordination of the EPIC Patient Advisory Group.

Paula Williamson contributed to the project specification and provided comments on the manuscript.

Bridget Young contributed to the grant application and project specification, designed the qualitative components, led in all aspects of their development, implementation, analysis and interpretation, reviewed all drafts of the manuscript, and agreed the final version of the manuscript.

## References

1. Gradinger F, Britten N, Wyatt K, et al. Values associated with public involvement in health and social care research: a narrative review. *Health Expect* 2013 doi: 10.1111/hex.12158
2. Stewart R, Liabo K. Involvement in research without compromising research quality. *Journal of Health Services Research & Policy* 2012;**17**(4):248-51 doi: DOI 10.1258/jhsrp.2012.011086
3. Barber R, Beresford P, Boote J, et al. Evaluating the impact of service user involvement on research: A prospective case study. *Int J Consumer Studies* 2011;**35**:609-15
4. Staley K. Exploring impact: Public involvement in NHS, public health and social care research. 2009. [http://www.invo.org.uk/wp-content/uploads/2011/11/Involve\\_Exploring\\_Impactfinal28.10.09.pdf](http://www.invo.org.uk/wp-content/uploads/2011/11/Involve_Exploring_Impactfinal28.10.09.pdf) (accessed 31 March 2014).
5. Goodare H, Smith R. The rights of patients in research. *Bmj* 1995;**310**(6990):1277-8
6. Selby JV, Lipstein SH. PCORI at 3 years--progress, lessons, and plans. *The New England journal of medicine* 2014;**370**(7):592-5 doi: 10.1056/NEJMp1313061
7. Snape D, Kirkham J, Preston J, et al. Exploring areas of consensus and conflict around values underpinning public involvement in health and social care research: a modified Delphi study. *BMJ Open* 2014;**4**(1):e004217 doi: 10.1136/bmjopen-2013-004217
8. Saunders C, Girgis A. Status, challenges and facilitators of consumer involvement in Australian health and medical research. *Health Res Policy Syst* 2010;**8**:34 doi: 10.1186/1478-4505-8-34
9. Hull D, Barton D, Guo K, et al. Patient and public involvement to support liver disease research. *Bri J Nurs* 2012;**21**(16):972-6
10. Robinson L, Newton J, Dawson P. Professionals and the public: power or partnership in health research? *J Eval Clin Pract* 2012;**18**(2):276-82 doi: 10.1111/j.1365-2753.2010.01572.x
11. Health Do. Best Research for Best Health: A new national health research strategy., 2006.
12. Public and patient involvement. Secondary Public and patient involvement. <http://www.nets.nihr.ac.uk/ppi>.
13. Godlee F. Towards the patient revolution. *BMJ* 2014;**348**:g1209 doi: 10.1136/bmj.g1209
14. Simpson A, Jones J, Barlow S, et al. Adding SUGAR: service user and carer collaboration in mental health nursing research. *J Psychosoc Nurs Ment Health Serv* 2014;**52**(1):22-30 doi: 10.3928/02793695-20131126-04
15. Mockford C, Staniszevska S, Griffiths F, et al. The impact of patient and public involvement on UK NHS health care: a systematic review. *Int J Qual Health Care* 2012;**24**(1):28-38 doi: 10.1093/intqhc/mzr066
16. Khwaja AI. Is increasing community participation always a good thing? *Journal of the European Economic Association* 2004;**2**:10
17. INVOLVE. Public involvement in clinical trials: Supplement to the briefing notes for researchers, 2012.
18. Vale CL, Thompson LC, Murphy C, et al. Involvement of consumers in studies run by the Medical Research Council Clinical Trials Unit: results of a survey. *Trials* 2012;**13**:9 doi: 10.1186/1745-6215-13-9
19. Boote J, Baird W, Beecroft C. Public involvement at the design stage of primary health research: a narrative review of case examples. *Health Policy* 2010;**95**(1):10-23 doi: 10.1016/j.healthpol.2009.11.007
20. Gamble C, Dudley L, Allam A, et al. Patient and public involvement in the early stages of clinical trial development: a systematic cohort investigation. *BMJ Open* 2014;**4**:e005234. doi:10.1136/bmjopen-2014-005234
21. Braun V, Clarke V. Using thematic analysis in psychology. *Qualitative Research in Psychology* 2006;**3**(2):83 doi: 10.1191/1478088706qp063oa
22. Ritchie J, Spencer L. Qualitative data analysis for applied policy research. In: Burgess RG, Bryman A, eds. *Analyzing Qualitative Data*. London: Routledge:173-94.

- 1  
2  
3 23. Shenton AK. Strategies for ensuring trustworthiness in qualitative research projects. *Education*  
4 *for Information* 2004;**22**:63-75
- 5 24. Snape D, Kirkham J, Britten N, et al. Exploring perceived barriers, drivers, impacts and the need  
6 for evaluation of public involvement in health and social care research: a modified Delphi  
7 study. *BMJ Open* 2014;**4**(6):e004943 doi: 10.1136/bmjopen-2014-004943
- 8 25. Mathie E, Wilson P, Poland F, et al. Consumer involvement in health research: a UK scoping and  
9 survey. *International Journal of Consumer Studies* 2014;**38**(1):35-44 doi: 10.1111/ijcs.12072
- 10 26. Staniszewska S, Jones N, Newburn M, et al. User involvement in the development of a research  
11 bid: barriers, enablers and impacts. *Health Expect* 2007;**10**(2):173-83 doi: 10.1111/j.1369-  
12 7625.2007.00436.x
- 13 27. Hewlett S, Wit M, Richards P, et al. Patients and professionals as research partners: challenges,  
14 practicalities, and benefits. *Arthritis Rheum* 2006;**55**(4):676-80 doi: 10.1002/art.22091
- 15 28. Evans BA, Bedson E, Bell P, et al. Involving service users in trials: developing a standard operating  
16 procedure. *Trials* 2013;**14**:219 doi: 10.1186/1745-6215-14-219[published Online First: Epub  
17 Date]].
- 18 29. Group PS. The Public Involvement Impact Assessment Framework: executive Summary.  
19 Secondary The Public Involvement Impact Assessment Framework: executive Summary.  
20 <http://piiaf.org.uk/documents/exec-summary-0114.pdf>
- 21 30. Williamson P, Clarke M. The COMET (Core Outcome Measures in Effectiveness Trials) Initiative:  
22 Its Role in Improving Cochrane Reviews. *The Cochrane database of systematic reviews*  
23 2012;**5**:Ed000041 doi: 10.1002/14651858.ed000041
- 24 31. Williamson PR, Altman DG, Blazeby JM, et al. Developing core outcome sets for clinical trials:  
25 issues to consider. *Trials* 2012;**13**:132 doi: 10.1186/1745-6215-13-132
- 26 32. Staniszewska S, Brett J, Mockford C, et al. The GRIPP checklist: strengthening the quality of  
27 patient and public involvement reporting in research. *Int J Technol Assess Health Care*  
28 2011;**27**(4):391-9 doi: 10.1017/S0266462311000481
- 29  
30  
31  
32  
33  
34  
35  
36  
37  
38  
39  
40  
41  
42  
43  
44  
45  
46  
47  
48  
49  
50  
51  
52  
53  
54  
55  
56  
57  
58  
59  
60

1  
2  
3  
4  
5  
6  
7  
8  
9  
10  
11  
12  
13  
14  
15  
16  
17  
18  
19  
20  
21  
22  
23  
24  
25  
26  
27  
28  
29  
30  
31  
32  
33  
34  
35  
36  
37  
38  
39  
40  
41  
42  
43  
44  
45  
46  
47  
48  
49

**Table 1 Summary of planned and implemented PPI activity by type of role**

|                                                                                                                 |
|-----------------------------------------------------------------------------------------------------------------|
| Based on informants’ accounts, it was unclear whether the trial fully implemented or was implementing all plans |
| Based on informants’ accounts, the trial did what planned in that PPI had been or was being fully implemented   |
| n/a No documented plans                                                                                         |

| Trial id<br>Status (trial ended or ongoing)<br>Mode(s)    | Summary of planned activity*                                                                                                                                                                                                                       | PPI plans fully implemented?<br>Y=yes<br>U=unclear | Actual PPI activity**                                                                                                                                                                                                                                                                                  |
|-----------------------------------------------------------|----------------------------------------------------------------------------------------------------------------------------------------------------------------------------------------------------------------------------------------------------|----------------------------------------------------|--------------------------------------------------------------------------------------------------------------------------------------------------------------------------------------------------------------------------------------------------------------------------------------------------------|
| <b>a) Trials which had a chiefly oversight mode (n=6)</b> |                                                                                                                                                                                                                                                    |                                                    |                                                                                                                                                                                                                                                                                                        |
| 115<br>Ended<br>Oversight                                 | Unclear whether trial had PPI co-applicants although service user contributed to the proposal.<br>“We will make use of two primary care research networks and an exercise research network.”                                                       | U                                                  | Had PPI membership on TSC but unclear in terms of “making use of research networks”. CI had expectations for and prior experience of PPI; no challenges. PPI contributor had prior experience of PPI; challenges (problems getting to meetings because of health).                                     |
| 36<br>Ongoing<br>Oversight                                | No PPI co-applicants.<br>Patient rep was named as a member of the TSC.<br>In response to referee comments, applicants stated they would consider increasing the number of PPI contributors on the TSC from one to two "to provide mutual support". | Y                                                  | Has 2 PPI contributors on TSC but CI talked of “no direct impact” and “ticking a political box”. CI had no expectations for but had prior experience of PPI; challenges (“only very minor such as patient rep not having email”). PPI contributor had no prior experience of PPI; challenges (jargon). |
| 65<br>Ended<br>Oversight                                  | No PPI co-applicants.<br>“We will have lay representation on the TSC.<br>We will use the expertise and contacts of our panel to form focus groups to assist in the understanding and dissemination of findings.”                                   | U                                                  | Had PPI membership on TSC as planned but unclear whether implemented plans regarding the use of the panel/focus groups to understand/disseminate findings. CI felt no direct PPI involvement overall. CI                                                                                               |



|                                                                      |                                                                                                                                                                                                                                                                                                                                                                                                                                                                                                                                                                                                                             |     |                                                                                                                                                                                                                                                                                                                                                                                                                                                                       |
|----------------------------------------------------------------------|-----------------------------------------------------------------------------------------------------------------------------------------------------------------------------------------------------------------------------------------------------------------------------------------------------------------------------------------------------------------------------------------------------------------------------------------------------------------------------------------------------------------------------------------------------------------------------------------------------------------------------|-----|-----------------------------------------------------------------------------------------------------------------------------------------------------------------------------------------------------------------------------------------------------------------------------------------------------------------------------------------------------------------------------------------------------------------------------------------------------------------------|
|                                                                      |                                                                                                                                                                                                                                                                                                                                                                                                                                                                                                                                                                                                                             |     | had no expectations for but had prior experience of PPI; challenges (getting the right people engaged; difficult target population; unable to get enough early engagement to inform changes to study design). No PPI contributor interview.                                                                                                                                                                                                                           |
| 2<br>Ongoing<br>Oversight                                            | No PPI co-applicants.<br>No documented plans. Did refer to PPI that had occurred prior to grant application.                                                                                                                                                                                                                                                                                                                                                                                                                                                                                                                | n/a | Has PPI membership on TSC. CI had no expectations for but had prior experience of PPI although spoke of initial “tokenism” and “ignorance” about what to expect of PPI in current trial; challenges (“just the slight feeling that we were taking up her time”). No PPI contributor interview.                                                                                                                                                                        |
| 64<br>Ended<br>Oversight                                             | No PPI co-applicants.<br>“We have identified two people with [condition] who have agreed to be consumer reps and have advised on the development of this proposal.”                                                                                                                                                                                                                                                                                                                                                                                                                                                         | Y   | No CI interview. Had PPI membership on TSC. PPI contributor had no prior experience of PPI; challenges (jargon, unable to attend all the meetings, some team members were felt to lack understanding).                                                                                                                                                                                                                                                                |
| 96<br>Ongoing<br>Oversight                                           | No PPI co-applicants.<br>“A patient representative will provide input into the design of patient literature and trial presentations to a general audience as well as providing a patient’s perspective at TSC and [Data Monitoring and Ethics Committee] meetings. TSC will meet two to three times a year.”                                                                                                                                                                                                                                                                                                                | Y   | No CI interview. Has PPI membership on TSC. “Keep in contact” approximately twice a year. PPI contributor had no prior experience of PPI; no challenges.                                                                                                                                                                                                                                                                                                              |
| <b>b) Trials which included a managerial mode (n=14)<sup>‡</sup></b> |                                                                                                                                                                                                                                                                                                                                                                                                                                                                                                                                                                                                                             |     |                                                                                                                                                                                                                                                                                                                                                                                                                                                                       |
| 20<br>Ended<br>Managerial +<br>responsive                            | Had a PPI co-applicant.<br>“The research team will convene a steering group of research and service users. This will meet three times during the study and will provide an opportunity for the research team to consult about research design and methods for data collection, choice of outcomes and methods for data analyses. The TSC will have an important role in interpreting initial findings and developing dissemination strategies. Consultation with young people and parents will be carried out in intervention and comparison clinics using focus groups. The views gathered in these groups will inform the | Y   | Had input from four PPI contributors at different times. Membership on TSC. Sought additional input when struggling with particular issues. CI had expectations for and prior experience of PPI; challenges (having a contributor who was a patient of the lead PI - “conflict of roles”; frustration at inability to integrate contributors’ ideas regarding questionnaire which was a validated instrument and therefore could not be altered.) PPI contributor had |

|                                                            |                                                                                                                                                                                                                                                                                                                                                                                                                                                                                                                                                                                                                                                                                                                     |   |                                                                                                                                                                                                                                                                                                                                                                                                                                                             |
|------------------------------------------------------------|---------------------------------------------------------------------------------------------------------------------------------------------------------------------------------------------------------------------------------------------------------------------------------------------------------------------------------------------------------------------------------------------------------------------------------------------------------------------------------------------------------------------------------------------------------------------------------------------------------------------------------------------------------------------------------------------------------------------|---|-------------------------------------------------------------------------------------------------------------------------------------------------------------------------------------------------------------------------------------------------------------------------------------------------------------------------------------------------------------------------------------------------------------------------------------------------------------|
|                                                            | development of research procedures (e.g. consent, outcome measures), tools for data collection and the process evaluation. Focus groups will also provide opportunity for young people to contribute to interpretation of study findings. Further consultation with young people will involve piloting all research tools to ensure acceptability and appropriateness.”                                                                                                                                                                                                                                                                                                                                             |   | no prior experience except as charity member; no challenges.                                                                                                                                                                                                                                                                                                                                                                                                |
| 21<br>Ended<br>Oversight +<br>managerial +<br>responsive   | Had a PPI co-applicant.<br>“User and consumer groups have discussed the application and suggested changes to protocol which we have accepted. In the trial the groups will be asked to help with development of info leaflets, consent forms, letters, questionnaire design. The groups were very keen that a user was a collaborator on grant application. The team includes [name], a consumer representative who is chair of [Consumer Research Group], works with the [condition] Association and the [Research Network].”                                                                                                                                                                                      | Y | Had PPI co-applicant. Plans expanded (in terms of recruitment, analysis, interpretation of results, dissemination). CI had expectations for and prior experience of PPI; challenges (“poaching” of contributors; stress about funding/paying contributors for their time if in receipt of benefits/pension; disagreement with funders regarding contributor’s activities). PPI contributor had prior experience of PPI; challenges (time; being in demand). |
| 27<br>Ongoing<br>Oversight +<br>managerial +<br>responsive | No PPI co-applicants.<br>“We will include two [condition] patients to act in an advisory capacity. They will be invited to attend all collaborator meetings and quarterly trial management meetings. We will disseminate project information and findings for patients and patient groups.”                                                                                                                                                                                                                                                                                                                                                                                                                         | Y | Has PPI membership on trial management, steering, and data monitoring groups. CI had expectations for and prior experience of PPI; challenges (finding contributors). 2 PPI contributors interviewed had no prior experience of PPI; challenges (some doctors don’t want to understand your point of view; jargon; they talk about things you have gone through as a patient in a dispassionate way).                                                       |
| 16<br>Ongoing<br>Oversight +<br>managerial                 | Had a PPI co-applicant.<br>“[Name] is Head of Policy and Research at [name of a national trust]. She has extensive experience of representing the views of the consumer in clinical research and at local and national policy levels. [She] will ensure that the perspective of the consumer remains central during all stages of the trial. Independent user representative(s) will be included on the TSC. The role of user representatives on the Data Monitoring Committee is more difficult because of the complex technical nature of the role of this committee. However, once a Chair of the Data Monitoring Committee has been appointed, we will discuss with the Chair their views about the composition | Y | Has PPI co-applicant. CI had expectations for and prior experience of PPI; challenges (finding the right people; consumer groups with a specific interest and so may be “partisan”). PPI contributor had prior experience of PPI; challenges (jargon; infrequent meetings ‘not much to build a relationship on’).                                                                                                                                           |

|                                                            |                                                                                                                                                                                                                                                                                                                                                                                                                                                                                                                                                                                                                                                                                                                                                   |     |                                                                                                                                                                                                                                                                                                                                                                                                                                                                                                   |
|------------------------------------------------------------|---------------------------------------------------------------------------------------------------------------------------------------------------------------------------------------------------------------------------------------------------------------------------------------------------------------------------------------------------------------------------------------------------------------------------------------------------------------------------------------------------------------------------------------------------------------------------------------------------------------------------------------------------------------------------------------------------------------------------------------------------|-----|---------------------------------------------------------------------------------------------------------------------------------------------------------------------------------------------------------------------------------------------------------------------------------------------------------------------------------------------------------------------------------------------------------------------------------------------------------------------------------------------------|
|                                                            | of this committee, and specifically the role of users. User groups at annual [User Group meeting] have commented on the proposal and several groups have agreed to help develop the information and consent process.”                                                                                                                                                                                                                                                                                                                                                                                                                                                                                                                             |     |                                                                                                                                                                                                                                                                                                                                                                                                                                                                                                   |
| 5<br>Ongoing<br>Oversight +<br>managerial                  | Had a PPI co-applicant.<br>“We have identified consumer representation from participants in our previous studies, and one, who is a grant applicant, has contributed to the development of the application, trial design and study documentation, particularly the information to be provided about the safety and efficacy of [device]. We have identified a consumer representative to ensure that patients' views are incorporated into the design from the start. She is a grant applicant and has already contributed to the trial design and the participant information sheet. Consumer groups will ensure all relevant issues are covered, that patient information and survey instruments are acceptable and outcome measures relevant.” | Y   | Has PPI co-applicant. CI had no expectations for but had prior experience of PPI; challenges (finding the right people; finding people without an “axe to grind”). 2 PPI contributors interviewed had no prior experience of PPI; challenges (jargon, not liking flying).                                                                                                                                                                                                                         |
| 10<br>Ongoing<br>Oversight +<br>managerial +<br>responsive | Had PPI co-investigator.<br>No documented plans.                                                                                                                                                                                                                                                                                                                                                                                                                                                                                                                                                                                                                                                                                                  | n/a | Has co-investigator (from local authority). Consulted with parents regarding timing of intervention. Has a contributor on TSC. When getting low response, approached [education professionals] for advice. CI had expectations for PPI; said had no formal PPI experience “only informal”; challenges (sometimes difficult to get in touch with co-investigator contributor due to other commitments). PPI contributor had prior experience of PPI; challenges (concern about “being too picky”). |
| 4<br>Ended<br>Managerial                                   | No PPI co-applicants.<br>“A project management steering group [...] will include all co-applicants, research assistants and user representatives. User representatives will be involved in the development, implementation and interpretation of the study. This involvement will include: advice on recruiting patients, invitation letters, the design of information leaflets, and research instruments, piloting assessments, helping to assess progress, and contributing to the evaluation of the project, the interpretation of findings and the dissemination of results. User representatives will be invited to project steering group meetings and                                                                                     | Y   | Had 2 PPI members on the trial management group. Involved in most activities as envisaged and while unclear from CI interview about plans for interpretation of the study, responses to the CI survey indicate that analysis had not yet started. CI had expectations for and prior experience of PPI; no challenges. No PPI contributor interview.                                                                                                                                               |

|                                                            |                                                                                                                                                                                                                                                                                                                                                                                                                                                                                                                                                                                                                                                                                                                                                                                                                                                                                                                                                                                                                                                                                                                                                                                             |   |                                                                                                                                                                                                                                                                                                                                                                                                                                                           |
|------------------------------------------------------------|---------------------------------------------------------------------------------------------------------------------------------------------------------------------------------------------------------------------------------------------------------------------------------------------------------------------------------------------------------------------------------------------------------------------------------------------------------------------------------------------------------------------------------------------------------------------------------------------------------------------------------------------------------------------------------------------------------------------------------------------------------------------------------------------------------------------------------------------------------------------------------------------------------------------------------------------------------------------------------------------------------------------------------------------------------------------------------------------------------------------------------------------------------------------------------------------|---|-----------------------------------------------------------------------------------------------------------------------------------------------------------------------------------------------------------------------------------------------------------------------------------------------------------------------------------------------------------------------------------------------------------------------------------------------------------|
|                                                            | also provide assistance in each centre.”                                                                                                                                                                                                                                                                                                                                                                                                                                                                                                                                                                                                                                                                                                                                                                                                                                                                                                                                                                                                                                                                                                                                                    |   |                                                                                                                                                                                                                                                                                                                                                                                                                                                           |
| 7<br>Ongoing<br>Oversight +<br>managerial +<br>responsive  | Had a PPI co-applicant.<br>“We will include patients and carers as active participants in the research at all stages. [Name] and [name] have taken the role of patient representatives during the preparation of this research proposal. As the relevant service users are highly likely to be frail, we will use innovative methods to allow full involvement. We will not expect attendance at full research team meetings by patients or carers, although our patient representatives may bring their views to the team meetings, following meetings with individual or groups of service users in other forums. We identified service users to be involved in this trial through the [names of 2 organisations]. Our named co-applicant will attend Trial Management Group meetings throughout the study in order to contribute the service user perspective at all stages. In addition, [name] is a named co-applicant to the study and will play a role in ensuring that a patient focus is maintained throughout the study. We also plan to seek further views through a wider stakeholder group that will feed into the Trial Management Group through a nominated representative.” | Y | Has PPI co-applicant and membership on trial management, steering and data monitoring groups. Also consult separate panel of service users for specific issues. CI had expectations for and prior experience of PPI; challenges (identifying/engaging the right people; some less able to articulate their views; some wanting to do something impossible; difficulty getting other staff to understand or prioritise PPI). No PPI contributor interview. |
| 14<br>Ongoing<br>Managerial                                | Had a PPI co-applicant.<br>“Co-applicant with an academic interest in representing patients' perspectives in the design and conduct of health care research will advise the research team on the development of processes and materials which take into account patient concerns”.                                                                                                                                                                                                                                                                                                                                                                                                                                                                                                                                                                                                                                                                                                                                                                                                                                                                                                          | Y | Has PPI co-applicant but CI felt it was a “tick box” exercise. CI had no expectations for or prior experience of PPI; challenges (meetings attendance; lack of engagement). No PPI contributor interview.                                                                                                                                                                                                                                                 |
| 41<br>Ongoing<br>Oversight +<br>managerial +<br>responsive | Had a PPI co-applicant.<br>“A representative from [charity] has been involved in preparatory work and will be nominated as a member of the TSC. A minimum of two users will be invited to be part of the project team. A virtual user advisory group will be developed to provide further user support as appropriate. User involvement will contribute to: TSC and project management decisions on all stages of the project; project approval; refinement of self-assessment tools and advice package, exercise intervention; training events for health professionals; interpretation of findings; evaluation of user involvement; dissemination.”                                                                                                                                                                                                                                                                                                                                                                                                                                                                                                                                       | Y | Has PPI co-applicant. Trial has 2 PPI contributors although CI feels no strong PPI input overall. Unclear whether CI had expectations for PPI; had no prior experience of PPI; challenges (contributors with an “axe to grind”; contributors’ lack confidence about contributing at meetings). No PPI contributor interview.                                                                                                                              |
| 55                                                         | Had a PPI co-applicant.                                                                                                                                                                                                                                                                                                                                                                                                                                                                                                                                                                                                                                                                                                                                                                                                                                                                                                                                                                                                                                                                                                                                                                     | Y | Had PPI co-applicant. Planned to involve consumer                                                                                                                                                                                                                                                                                                                                                                                                         |

|                                                                                     |                                                            |                                                                                                                                                                                                                                                                                                                                                                                                                                                                                                                                                                                                                                                                                        |   |                                                                                                                                                                                                                                                                                                                                                                                                                                                                                                                                                                                                 |
|-------------------------------------------------------------------------------------|------------------------------------------------------------|----------------------------------------------------------------------------------------------------------------------------------------------------------------------------------------------------------------------------------------------------------------------------------------------------------------------------------------------------------------------------------------------------------------------------------------------------------------------------------------------------------------------------------------------------------------------------------------------------------------------------------------------------------------------------------------|---|-------------------------------------------------------------------------------------------------------------------------------------------------------------------------------------------------------------------------------------------------------------------------------------------------------------------------------------------------------------------------------------------------------------------------------------------------------------------------------------------------------------------------------------------------------------------------------------------------|
| 1<br>2<br>3<br>4<br>5<br>6<br>7<br>8<br>9<br>10<br>11<br>12<br>13<br>14<br>15<br>16 | Ended Oversight + managerial                               | “Patient reps have been very much involved in the preparation of this bid since its inception. The lead service user joined the TSG, will co-ordinate involvement of service users in the consumer panel and report their views to the TSG. Members of the consumer panel have commented on the current proposal and will be asked to comment on specific design and / or management issues during the course of the study. In particular, their views have been, and will continue to be sought during the preparation of patient information leaflets and posters, and in the preparation of study newsletters. They will be asked to help with dissemination of research findings.” |   | panel in dissemination of the findings. This did not happen but PPI ‘evolved’ because the team disseminated through other partners i.e. other patients they were “working with in the field” by that time. Other plans were adhered to. CI had expectations for and prior experience of PPI; challenges (not realising how much training the panel might need; not being clear about expectations of the main contributor; panel feeling ostracised; difficulty getting trial manager to understand importance and use of the patient panel in the early stages). No PPI contributor interview. |
| 17<br>18<br>19<br>20<br>21<br>22<br>23<br>24                                        | 15 Ended Oversight + managerial                            | Had a PPI co-applicant.<br>“[Name], a former patient and lay member of the advisory panel, has been fully involved in the application process as a co-applicant and will be a full, active and vocal member. The trial will be guided by a group of respected and experienced critical care personnel and trialists as well as a ‘lay’ representative.”                                                                                                                                                                                                                                                                                                                                | Y | No CI interview. PPI co-applicant helped to prepare paperwork for funding; also member of TSC. PPI contributor had prior experience of PPI; challenges (jargon).                                                                                                                                                                                                                                                                                                                                                                                                                                |
| 25<br>26<br>27<br>28<br>29<br>30<br>31                                              | 34+ Ended Managerial                                       | Had a PPI co-applicant.<br>“This proposal has been reviewed by our patient service user group and any opinions and comments incorporated. A patient representative will attend TSC meetings and be directly involved in decision making of trial processes and then relay back information to the [user groups] on a regular basis. Our Service Users group will be involved in all aspects of project design, data collection, analysis and dissemination.”                                                                                                                                                                                                                           | U | No CI interview. Had PPI co-applicant who appears to have been involved as intended, but it is not clear whether plans to involve the user group in data collection, analysis and dissemination were implemented. PPI contributor had prior experience of PPI; challenges (not being involved from the start).                                                                                                                                                                                                                                                                                  |
| 32<br>33<br>34<br>35                                                                | 18+ Ongoing Managerial                                     | Unclear whether had PPI co-applicants.<br>Same plans as trial 34 above†                                                                                                                                                                                                                                                                                                                                                                                                                                                                                                                                                                                                                | U | As above except unclear whether the informant was a co-applicant on this particular trial.                                                                                                                                                                                                                                                                                                                                                                                                                                                                                                      |
| 36<br>37                                                                            | <b>c) Trials which included a responsive role (n=14) †</b> |                                                                                                                                                                                                                                                                                                                                                                                                                                                                                                                                                                                                                                                                                        |   |                                                                                                                                                                                                                                                                                                                                                                                                                                                                                                                                                                                                 |
| 38<br>39<br>40<br>41<br>42<br>43<br>44<br>45<br>46<br>47<br>48<br>49                | 20 Ended                                                   | Had a PPI co-applicant.<br>“The research team will convene a steering group of research and service                                                                                                                                                                                                                                                                                                                                                                                                                                                                                                                                                                                    | Y | Had input from four PPI contributors at different times. Membership on TSC. Sought additional input                                                                                                                                                                                                                                                                                                                                                                                                                                                                                             |

|                                                                                     |                                                    |                                                                                                                                                                                                                                                                                                                                                                                                                                                                                                                                                                                                                                                                                                                                                                                                                                                                                                 |   |                                                                                                                                                                                                                                                                                                                                                                                                                                                                  |
|-------------------------------------------------------------------------------------|----------------------------------------------------|-------------------------------------------------------------------------------------------------------------------------------------------------------------------------------------------------------------------------------------------------------------------------------------------------------------------------------------------------------------------------------------------------------------------------------------------------------------------------------------------------------------------------------------------------------------------------------------------------------------------------------------------------------------------------------------------------------------------------------------------------------------------------------------------------------------------------------------------------------------------------------------------------|---|------------------------------------------------------------------------------------------------------------------------------------------------------------------------------------------------------------------------------------------------------------------------------------------------------------------------------------------------------------------------------------------------------------------------------------------------------------------|
| 1<br>2<br>3<br>4<br>5<br>6<br>7<br>8<br>9<br>10<br>11<br>12<br>13<br>14<br>15<br>16 | Managerial + responsive                            | users. This will meet three times during the study and will provide an opportunity for the research team to consult about research design and methods for data collection, choice of outcomes and methods for data analyses. The TSC will have an important role in interpreting initial findings and developing dissemination strategies. Consultation with young people and parents will be carried out in intervention and comparison clinics using focus groups. The views gathered in these groups will inform the development of research procedures (e.g. consent, outcome measures), tools for data collection and the process evaluation. Focus groups will also provide opportunity for young people to contribute to interpretation of study findings. Further consultation with young people will involve piloting all research tools to ensure acceptability and appropriateness." |   | when struggling with particular issues. CI had expectations for and prior experience of PPI; challenges (having a contributor who was a patient of the lead PI - "conflict of roles"; frustration at inability to integrate contributors' ideas regarding questionnaire which was a validated instrument and therefore could not be altered.) PPI contributor had no prior experience except as charity member; no challenges.                                   |
| 17<br>18<br>19<br>20<br>21<br>22<br>23<br>24<br>25<br>26<br>27                      | 101<br>Ended<br>Oversight + responsive             | No PPI co-applicants.<br>"We will convene user group meetings in each locality during the pilot study, we will organise separate focus groups to explore expectations of treatment. We have a commitment from panels of users/experts including representatives from relevant charities to meet annually during the study to advise on its conduct. We will have lay representation on the TSC."                                                                                                                                                                                                                                                                                                                                                                                                                                                                                                | Y | Had PPI membership on TSC and consulted with wider groups as planned. CI felt PPI was under utilised and said "people above me in the scheme of things may see it as a tick box exercise". CI had no expectations for PPI; unclear regarding prior experience of PPI; challenges (finding suitable people, "pinning people down", some may find it daunting whereas "professional PPI reps" do not). PPI contributor had prior experience of PPI; no challenges. |
| 28<br>29<br>30<br>31<br>32<br>33<br>34<br>35<br>36<br>37                            | 21<br>Ended<br>Oversight + managerial + responsive | Had a PPI co-applicant.<br>"User and consumer groups have discussed the application and suggested changes to protocol which we have accepted. In the trial the groups will be asked to help with development of info leaflets, consent forms, letters, questionnaire design. The groups were very keen that a user was a collaborator on grant application. The team includes [name], a consumer representative who is chair of [Consumer Research Group], works with the [condition] Association and the [Research Network]."                                                                                                                                                                                                                                                                                                                                                                  | Y | Plans expanded (in terms of recruitment, analysis, interpretation of results, dissemination). CI had expectations for and prior experience of PPI; challenges ("poaching" of contributors; stress about funding/paying contributors for their time if in receipt of benefits/pension; disagreement with funders regarding contributor's activities). PPI contributor had prior experience of PPI; challenges (time; being in demand).                            |
| 38<br>39<br>40<br>41<br>42<br>43<br>44<br>45<br>46<br>47<br>48<br>49                | 27<br>Ongoing                                      | No PPI co-applicants.<br>"We will include two [condition] patients to act in an advisory capacity. They                                                                                                                                                                                                                                                                                                                                                                                                                                                                                                                                                                                                                                                                                                                                                                                         | Y | Has PPI membership on trial management, steering, and data monitoring groups. CI had expectations for                                                                                                                                                                                                                                                                                                                                                            |

1  
2  
3  
4  
5  
6  
7  
8  
9  
10  
11  
12  
13  
14  
15  
16  
17  
18  
19  
20  
21  
22  
23  
24  
25  
26  
27  
28  
29  
30  
31  
32  
33  
34  
35  
36  
37  
38  
39  
40  
41  
42  
43  
44  
45  
46  
47  
48  
49

|                                                      |                                                                                                                                                                                                                                                                                                                                                                                                                                                                                                                        |     |                                                                                                                                                                                                                                                                                                                                                                                                                                |
|------------------------------------------------------|------------------------------------------------------------------------------------------------------------------------------------------------------------------------------------------------------------------------------------------------------------------------------------------------------------------------------------------------------------------------------------------------------------------------------------------------------------------------------------------------------------------------|-----|--------------------------------------------------------------------------------------------------------------------------------------------------------------------------------------------------------------------------------------------------------------------------------------------------------------------------------------------------------------------------------------------------------------------------------|
| Oversight + managerial + responsive                  | will be invited to attend all collaborator meetings and quarterly trial management meetings. We will disseminate project information and findings for patients and patient groups.”                                                                                                                                                                                                                                                                                                                                    |     | and prior experience of PPI; challenges (finding contributors). 2 PPI contributors interviewed had no prior experience of PPI; challenges (some doctors don’t want to understand your point of view; jargon; they talk about things you have gone through as a patient in a dispassionate way).                                                                                                                                |
| 10<br>Ongoing<br>Oversight + managerial + responsive | Had PPI ‘co-investigator’.<br>No documented plans.                                                                                                                                                                                                                                                                                                                                                                                                                                                                     | n/a | Consulted with parents regarding timing of intervention. Has a contributor on TSC. When getting low response, approached [education professionals] for advice. CI had expectations for PPI; said had no formal PPI experience “only informal”; challenges (sometimes difficult to get in touch with co-investigator contributor due to other commitments). PPI contributor’s challenges: concern about ‘being too pernickety’. |
| 9<br>Ended<br>Oversight + responsive                 | Unclear whether there were PPI co-applicants.<br>“The TSC will include a patient representative, [name], who has acted in this capacity in several other large-scale trials and is aware of issues that might be raised from the lay perspective. The patient information leaflet and consent form have been reviewed by potential service users, and their comments taken into account in finalising these documents prior to submission for ethics approval.”                                                        | Y   | Unclear whether CI had expectations for or prior experience of PPI; no challenges. No PPI contributor interview.                                                                                                                                                                                                                                                                                                               |
| 102<br>Ended<br>Oversight + responsive               | No PPI co-applicants.<br>“At the outline proposal stage, this trial was submitted to the [name of funding body] who sought the opinion of the [condition] Society. The [condition] Society unequivocally confirmed their support of the proposed trial. The [condition] Society have also confirmed their willingness to represent their members through steering committee membership of the [name of trial] and to help the trialists in the construction of the MREC application and patient information leaflets.” | Y   | Seems to have expanded plans (in terms of dissemination, i.e. press releases and findings for participants). CI had expectations for and prior experience of PPI; no challenges. No PPI contributor interview.                                                                                                                                                                                                                 |
| 6<br>Ongoing                                         | No PPI co-applicants.<br>“The TSC will include an already identified patient. He will provide an                                                                                                                                                                                                                                                                                                                                                                                                                       | Y   | CI had expectations for but unclear whether had prior experience of PPI; no challenges. No PPI                                                                                                                                                                                                                                                                                                                                 |

|                                                   |                                                                                                                                                                                                                                                                                                                                                                                                                                                                                                                                                                                                                                                                                                                                                                                                                                                                                                                                                                                                                                                                                                                                                                                             |     |                                                                                                                                                                                                                                                                                                                                                          |
|---------------------------------------------------|---------------------------------------------------------------------------------------------------------------------------------------------------------------------------------------------------------------------------------------------------------------------------------------------------------------------------------------------------------------------------------------------------------------------------------------------------------------------------------------------------------------------------------------------------------------------------------------------------------------------------------------------------------------------------------------------------------------------------------------------------------------------------------------------------------------------------------------------------------------------------------------------------------------------------------------------------------------------------------------------------------------------------------------------------------------------------------------------------------------------------------------------------------------------------------------------|-----|----------------------------------------------------------------------------------------------------------------------------------------------------------------------------------------------------------------------------------------------------------------------------------------------------------------------------------------------------------|
| Oversight + responsive                            | informed patient perspective. He is willing to assist us in the trial, and will be listed as a member of the TSC. We will also work with [charity] to involve service users. This will be done through our links with the [unit], which is co-directed by one of our applicants, [name]. We will begin this process during the protocol set-up period.”                                                                                                                                                                                                                                                                                                                                                                                                                                                                                                                                                                                                                                                                                                                                                                                                                                     |     | contributor interview.                                                                                                                                                                                                                                                                                                                                   |
| 7<br>Ongoing Oversight + managerial + responsive  | Had a PPI co-applicant.<br>“We will include patients and carers as active participants in the research at all stages. [Name] and [name] have taken the role of patient representatives during the preparation of this research proposal. As the relevant service users are highly likely to be frail, we will use innovative methods to allow full involvement. We will not expect attendance at full research team meetings by patients or carers, although our patient representatives may bring their views to the team meetings, following meetings with individual or groups of service users in other forums. We identified service users to be involved in this trial through the [names of 2 organisations]. Our named co-applicant will attend Trial Management Group meetings throughout the study in order to contribute the service user perspective at all stages. In addition, [name] is a named co-applicant to the study and will play a role in ensuring that a patient focus is maintained throughout the study. We also plan to seek further views through a wider stakeholder group that will feed into the Trial Management Group through a nominated representative.” | Y   | Consulted separate panel of service users for specific issues. CI had expectations for and prior experience of PPI; challenges (identifying/engaging the right people; some less able to articulate their views; some wanting to do something impossible; difficulty getting other staff to understand or prioritise PPI). No PPI contributor interview. |
| 41<br>Ongoing Oversight + managerial + responsive | Had a PPI co-applicant.<br>“A representative from [charity] has been involved in preparatory work and will be nominated as a member of the TSC. A minimum of two users will be invited to be part of the project team. A virtual user advisory group will be developed to provide further user support as appropriate. User involvement will contribute to: TSC and project management decisions on all stages of the project; project approval; refinement of self-assessment tools and advice package, exercise intervention; training events for health professionals; interpretation of findings; evaluation of user involvement; dissemination.”                                                                                                                                                                                                                                                                                                                                                                                                                                                                                                                                       | Y   | Has PPI co-applicant. Trial has 2 PPI contributors although CI feels no strong PPI input overall. Unclear whether CI had expectations for PPI; had no prior experience of PPI; challenges (contributors with an “axe to grind”; contributors’ lack confidence about contributing at meetings). No PPI contributor interview.                             |
| 79<br>Ended Oversight +                           | No PPI co-applicants.<br>No documented plans.                                                                                                                                                                                                                                                                                                                                                                                                                                                                                                                                                                                                                                                                                                                                                                                                                                                                                                                                                                                                                                                                                                                                               | n/a | Although no documented plans the CI wanted PPI to sit on TSC and comment on patient info leaflets. The CI felt that PPI started early. There were 2 types of                                                                                                                                                                                             |



|                                            |                                                                                                                                                                                                                                                                                                                                                                                                                                                                                                                                                                                                                                                                                                                                                                                                           |   |                                                                                                                                                                                                                                                                                                                                                                                                                                                                                                                                                      |
|--------------------------------------------|-----------------------------------------------------------------------------------------------------------------------------------------------------------------------------------------------------------------------------------------------------------------------------------------------------------------------------------------------------------------------------------------------------------------------------------------------------------------------------------------------------------------------------------------------------------------------------------------------------------------------------------------------------------------------------------------------------------------------------------------------------------------------------------------------------------|---|------------------------------------------------------------------------------------------------------------------------------------------------------------------------------------------------------------------------------------------------------------------------------------------------------------------------------------------------------------------------------------------------------------------------------------------------------------------------------------------------------------------------------------------------------|
| responsive                                 |                                                                                                                                                                                                                                                                                                                                                                                                                                                                                                                                                                                                                                                                                                                                                                                                           |   | involvement: 2 contributors on the TSC; and then obtained views on information sheets from relevant groups. CI had no previous experience of PPI; no challenges. No PPI contributor interview.                                                                                                                                                                                                                                                                                                                                                       |
| 76<br>Ongoing<br>Oversight +<br>responsive | No PPI co-applicants.<br>“The [organisation] has recently established a Research Advisory Group. This Group, which includes key stakeholders with an interest in the research carried out by [organisation] (patients, charities representing patients’ interests, general practitioners, NHS commissioners, research funding organisations and a regional [medical] network), has been set up to ensure that the clinical research carried out in [organisation] is ethical, important, relevant, appropriately designed to meet the needs of patients and the NHS. We anticipate the Group would have the opportunity to influence important details of the project before recruitment starts. A patient representative (we propose a member of the [advisory group]) will be invited to join the TSC.” | U | Has PPI membership on TSC as planned; unclear whether plans to seek advice of new advisory group prior to recruitment were implemented (although did approach a group of patients from a previous trial about format/comprehensibility of questionnaire). CI talked of a “tick box exercise” but also ensuring participants’ perspective; “overseeing the trial – a ‘safeguard’ rather than improving research”. CI had expectations for but no prior experience of PPI; challenges (communication and understanding). No PPI contributor interview. |
| 106<br>Ended<br>Oversight +<br>responsive  | No PPI co-applicants.<br>“We have consulted widely, including with patients to seek their views on trial design and relevant outcome measures. We have involved service users in the design of the trial. We used the patient information pack and part of the questionnaire that has been developed and validated in collaborative research with the [institute] as a basis for in-depth interviews to identify patient perspectives on trial design and outcomes. We have identified one service user, [name], who will advise the trial management committee on patient perspectives.”                                                                                                                                                                                                                 | Y | No CI interview. PPI contributor had prior experience of PPI but felt she had made no difference to the trial; no challenges.                                                                                                                                                                                                                                                                                                                                                                                                                        |
| 91<br>Ongoing<br>Oversight +<br>responsive | No PPI co-applicants.<br>“We have involved [name] who is a non-executive patient representative member of [hospital trust] and who has co-ordinated consumers’ input into the scientific quality, feasibility and practicality of the proposal. She will continue to participate in the protocol design of the study and be a member of the TSC.”                                                                                                                                                                                                                                                                                                                                                                                                                                                         | Y | No CI interview. Plans expanded (in terms of the PPI contributor obtaining feedback from “women’s groups”). PPI contributor had prior experience of PPI; challenges (just being confident enough to make your point).                                                                                                                                                                                                                                                                                                                                |

\* As described in the funding application and/or study protocol; includes justification of costs where data were available

1  
2  
3  
4  
5  
6  
7  
8  
9  
10  
11  
12  
13  
14  
15  
16  
17  
18  
19  
20  
21  
22  
23  
24  
25  
26  
27  
28  
29  
30  
31  
32  
33  
34  
35  
36  
37  
38  
39  
40  
41  
42  
43  
44  
45  
46  
47  
48  
49

\*\*As discussed during informant interviews - any reference to tokenism; whether CI had prior experience of or personal expectations for PPI; whether CI mentioned challenges; whether PPI contributor mentioned challenges  
† PPI contributor was discussing 2 trials [id 18 and 34] during the interview  
‡ Many trials utilised more than one form of PPI  
TSC=trial steering committee

For peer review only

**Table 2 Summary of challenges met by CIs and contributors to PPI in clinical trials**

| CI interviews (n=21)                                                                        | PPI contributor interviews (n=17)*                        |
|---------------------------------------------------------------------------------------------|-----------------------------------------------------------|
| <u>Challenges common to researchers and PPI contributors:</u>                               |                                                           |
| Failure to engage contributors fully or early                                               | Not being involved from the start;<br>Infrequent meetings |
| Contributors overawed/lacking confidence                                                    | Feeling unqualified or overwhelmed                        |
| Failing to clarify to contributors what was expected of them                                | Role expectations (being unsure what was expected of you) |
| Worry about taking up contributor's time                                                    | Time constraints                                          |
| Contributors being 'poached'                                                                | Being in demand by other research teams                   |
| Meeting attendance by PPI contributors                                                      | Getting to meetings                                       |
| <u>Challenges unique to researchers or PPI contributors:</u>                                |                                                           |
| Finding the right people                                                                    | Jargon                                                    |
| Own patient as a PPI contributor (can lead to conflict between clinical and research roles) | Interactions within team and being listened to            |
| Communication difficulties due to age                                                       | Concern about appearing confrontational                   |
| Change of PPI personnel                                                                     | Concern about appearing too 'pernickety'                  |
| Getting other team members to understand/prioritise PPI                                     | Remembering 'what side you are on'                        |
| Underestimating training needs of contributors                                              |                                                           |
| Worry that contributors may lose payment if receiving state pension/benefits                |                                                           |
| Disagreement with funders about implementing contributors' suggestions                      |                                                           |

\* One PPI contributor was involved in and talked about 2 trials which were in this sample, and there were 2 trials for which we had 2 PPI contributor interviews each

1  
2  
3  
4  
5  
6  
7  
8  
9  
10  
11  
12  
13  
14  
15  
16  
17  
18  
19  
20  
21  
22  
23  
24  
25  
26  
27  
28  
29  
30  
31  
32  
33  
34  
35  
36  
37  
38  
39  
40  
41  
42  
43  
44  
45  
46  
47  
48  
49

For peer review only

**COREQ (Consolidated criteria for reporting qualitative research): 32-item checklist for interviews and focus groups**

**Domain 1: Research team and reflexivity**

| Personal Characteristics       |                                          |                                                                                                                                                                                                                                                                                                                                                                |
|--------------------------------|------------------------------------------|----------------------------------------------------------------------------------------------------------------------------------------------------------------------------------------------------------------------------------------------------------------------------------------------------------------------------------------------------------------|
| 1.                             | Interviewer/facilitator                  | Which author/s conducted the interview or focus group?<br><i>Described in methods.</i>                                                                                                                                                                                                                                                                         |
| 2.                             | Credentials                              | What were the researcher's credentials? <i>E.g. PhD, MD</i><br><i>Described in methods.</i>                                                                                                                                                                                                                                                                    |
| 3.                             | Occupation                               | What was their occupation at the time of the study?<br><i>Described in methods.</i>                                                                                                                                                                                                                                                                            |
| 4.                             | Gender                                   | Was the researcher male or female?<br><i>Obvious from contextual information in the paper.</i>                                                                                                                                                                                                                                                                 |
| 5.                             | Experience and training                  | What experience or training did the researcher have?<br><i>Described in methods.</i>                                                                                                                                                                                                                                                                           |
| Relationship with participants |                                          |                                                                                                                                                                                                                                                                                                                                                                |
| 6.                             | Relationship established                 | Was a relationship established prior to study commencement?<br><i>Described in methods.</i>                                                                                                                                                                                                                                                                    |
| 7.                             | Participant knowledge of the interviewer | What did the participants know about the researcher? <i>e.g. personal goals, reasons for doing the research</i><br><i>Participants were informed of the reasons for the research in the information leaflet.</i>                                                                                                                                               |
| 8.                             | Interviewer characteristics              | What characteristics were reported about the interviewer/facilitator? <i>e.g. Bias, assumptions, reasons and interests in the research topic</i><br><i>The interviewer was new to the field of patient involvement in research and sought to maintain an open minded approach in exploring its implementation in trials – this is reported in the methods.</i> |

**Domain 2: Study design**

| Theoretical framework |                                       |                                                                                                                                                                                                 |
|-----------------------|---------------------------------------|-------------------------------------------------------------------------------------------------------------------------------------------------------------------------------------------------|
| 9.                    | Methodological orientation and Theory | What methodological orientation was stated to underpin the study? <i>e.g. grounded theory, discourse analysis, ethnography, phenomenology, content analysis</i><br><i>Described in methods.</i> |

|                       |                              |                                                                                                                                                                                                                                   |
|-----------------------|------------------------------|-----------------------------------------------------------------------------------------------------------------------------------------------------------------------------------------------------------------------------------|
| Participant selection |                              |                                                                                                                                                                                                                                   |
| 10.                   | Sampling                     | How were participants selected? <i>e.g. purposive, convenience, consecutive, snowball</i><br>Described in methods.                                                                                                                |
| 11.                   | Method of approach           | How were participants approached? <i>e.g. face-to-face, telephone, mail, email</i><br>Described in methods.                                                                                                                       |
| 12.                   | Sample size                  | How many participants were in the study?<br>Described in methods.                                                                                                                                                                 |
| 13.                   | Non-participation            | How many people refused to participate or dropped out?<br>Described in methods.<br>Reasons? Not known.                                                                                                                            |
| Setting               |                              |                                                                                                                                                                                                                                   |
| 14.                   | Setting of data collection   | Where was the data collected? <i>e.g. home, clinic, workplace</i><br>Telephone interviews (described).                                                                                                                            |
| 15.                   | Presence of non-participants | Was anyone else present besides the participants and researchers?<br><i>n/a – telephone interviews</i>                                                                                                                            |
| 16.                   | Description of sample        | What are the important characteristics of the sample? <i>e.g. demographic data, date</i><br>Described in methods.                                                                                                                 |
| Data collection       |                              |                                                                                                                                                                                                                                   |
| 17.                   | Interview guide              | Were questions, prompts, guides provided by the authors?<br>Described in a 'sister' paper.<br>Was it pilot tested?<br>Reviewed by patient advisory group and developed in light of on-going data analysis – described in methods. |
| 18.                   | Repeat interviews            | Were repeat interviews carried out? If yes, how many?<br>No, described in methods.                                                                                                                                                |
| 19.                   | Audio/visual recording       | Did the research use audio or visual recording to collect the data?<br>Yes – audio (described in methods).                                                                                                                        |
| 20.                   | Field notes                  | Were field notes made during and/or after the interview or focus group?<br>Described in methods.                                                                                                                                  |
| 21.                   | Duration                     | What was the duration of the interviews or focus group?<br>Described in methods.                                                                                                                                                  |
| 22.                   | Data saturation              | Was data saturation discussed?<br>Described in 'sister' paper.                                                                                                                                                                    |
| 23.                   | Transcripts returned         | Were transcripts returned to participants for comment and/or correction?<br>Described in methods.                                                                                                                                 |

## Domain 3: analysis and findings

|               |                                |                                                                                                                                                                         |
|---------------|--------------------------------|-------------------------------------------------------------------------------------------------------------------------------------------------------------------------|
| Data analysis |                                |                                                                                                                                                                         |
| 24.           | Number of data coders          | How many data coders coded the data?<br>Yes - described in methods.                                                                                                     |
| 25.           | Description of the coding tree | Did authors provide a description of the coding tree?<br>No, although available upon request (mentioned in methods).                                                    |
| 26.           | Derivation of themes           | Were themes identified in advance or derived from the data?<br>Derived – described in methods.                                                                          |
| 27.           | Software                       | What software, if applicable, was used to manage the data?<br>Described in methods.                                                                                     |
| 28.           | Participant checking           | Did participants provide feedback on the findings?<br>No – acknowledged in methods.                                                                                     |
| Reporting     |                                |                                                                                                                                                                         |
| 29.           | Quotations presented           | Were participant quotations presented to illustrate the themes / findings? Was each quotation identified? e.g. <i>participant number</i><br>Yes - described in methods. |
| 30.           | Data and findings consistent   | Was there consistency between the data presented and the findings?<br>Yes.                                                                                              |
| 31.           | Clarity of major themes        | Were major themes clearly presented in the findings?<br>Yes.                                                                                                            |
| 32.           | Clarity of minor themes        | Is there a description of diverse cases or discussion of minor themes?<br>Yes.                                                                                          |

# BMJ Open

**From plans to actions in patient and public involvement:  
Qualitative study of documented plans and the accounts of  
researchers and patients sampled from a cohort of clinical  
trials**

|                                    |                                                                                                                                                                                                                                                                                                                                                                                                              |
|------------------------------------|--------------------------------------------------------------------------------------------------------------------------------------------------------------------------------------------------------------------------------------------------------------------------------------------------------------------------------------------------------------------------------------------------------------|
| Journal:                           | <i>BMJ Open</i>                                                                                                                                                                                                                                                                                                                                                                                              |
| Manuscript ID:                     | bmjopen-2014-006400.R1                                                                                                                                                                                                                                                                                                                                                                                       |
| Article Type:                      | Research                                                                                                                                                                                                                                                                                                                                                                                                     |
| Date Submitted by the Author:      | 12-Nov-2014                                                                                                                                                                                                                                                                                                                                                                                                  |
| Complete List of Authors:          | Buck, Deborah; University of Liverpool, Biostatistics<br>Gamble, Carrol; The University of Liverpool, Biostatistics<br>Dudley, Louise; University of Liverpool,<br>Preston, Jennifer; University of Liverpool, Women's and Children's Health<br>Hanley, Bec; TwoCan Associates,<br>Williamson, Paula; University of Liverpool, Biostatistics<br>Young, Bridget; University of Liverpool, Clinical Psychology |
| <b>Primary Subject<br>Heading</b>: | Health services research                                                                                                                                                                                                                                                                                                                                                                                     |
| Secondary Subject Heading:         | Qualitative research                                                                                                                                                                                                                                                                                                                                                                                         |
| Keywords:                          | QUALITATIVE RESEARCH, Clinical trials < THERAPEUTICS, patient and<br>public involvement, patient and public engagement                                                                                                                                                                                                                                                                                       |
|                                    |                                                                                                                                                                                                                                                                                                                                                                                                              |

SCHOLARONE™  
Manuscripts

Only



**From plans to actions in patient and public involvement: Qualitative study of documented plans  
and the accounts of researchers and patients sampled from a cohort of clinical trials**

Deborah Buck, Carrol Gamble, Louise Dudley, Jennifer Preston, The EPIC Patient Advisory Group, Bec Hanley, Paula R Williamson, Bridget Young

Deborah Buck, Research Associate  
Department of Biostatistics, University of Liverpool, 1<sup>st</sup> floor Duncan Building, Daulby Street,  
Liverpool, L69 3GA

Carrol Gamble, Professor of Medical Statistics  
Department of Biostatistics, University of Liverpool, 1<sup>st</sup> floor Duncan Building, Daulby Street,  
Liverpool, L69 3GA

Louise Dudley, Research Associate  
Department of Biostatistics, University of Liverpool, 1<sup>st</sup> floor Duncan Building, Daulby Street,  
Liverpool, L69 3GA

Jennifer Preston, Consumer Liaison Manager  
NIHR Clinical Research Network: Children, Coordinating Centre, University of Liverpool, Department  
of Women's and Children's Health, Institute of Translational Medicine (Child Health), Alder Hey  
Children's NHS Foundation Trust, Eaton Road, Liverpool, L12 2AP

The EPIC Patient Advisory Group (Alison Allam, Philip Bell, Neil Formstone, Heather Goodare, and  
Alison Walker), Department of Biostatistics, University of Liverpool, 1<sup>st</sup> floor Duncan Building, Daulby  
Street, Liverpool, L69 3GA

Ms Bec Hanley. Co-director of TwoCan Associates  
TwoCan Associates, 59 Wickham Hill, Hurstpierpoint, Hassocks, BN6 9NR

Paula R Williamson, Professor of Medical Statistics  
Department of Biostatistics, University of Liverpool, 1<sup>st</sup> floor Duncan Building, Daulby Street,  
Liverpool, L69 3GA

Bridget Young, Professor of Psychology  
Department of Psychological Sciences, University of Liverpool, Whelan Building, Liverpool, L69 3GB

**Corresponding author:**

Professor Bridget Young

Email: [byoung@liv.ac.uk](mailto:byoung@liv.ac.uk) Tel: 0151 794 5525

**Keywords:** consumer participation; public and patient involvement; clinical trials

**Word count:** 7989 excluding Abstract, tables, figure, box, and references

## Abstract

Patient and public involvement (PPI) in research is increasingly required, although evidence to inform its implementation is limited.

### Objective

Inform the evidence base by describing how plans for PPI were implemented within clinical trials and identifying the challenges and lessons learnt by research teams.

### Methods

We compared PPI plans extracted from clinical trial grant applications (funded by the National Institute for Health Research Health Technology Assessment Programme between 2006-2010) with researchers' and PPI contributors' interview accounts of PPI implementation. Analysis of PPI plans and transcribed qualitative interviews drew on the Framework technique.

### Results

Of 28 trials, 25 documented plans for PPI in funding applications and half described implementing PPI before applying for funding. Plans varied from minimal to extensive, although almost all anticipated multiple modes of PPI. Interview accounts indicated that PPI plans had been fully implemented in 20/25 trials and even expanded in some. Nevertheless, some researchers described PPI within their trials as tokenistic. Researchers and contributors noted that late or minimal PPI engagement diminished its value. Both groups perceived uncertainty about roles in relation to PPI, and noted contributors' lack of confidence and difficulties attending meetings. PPI contributors experienced problems in interacting with researchers and understanding technical language. Researchers reported difficulties finding 'the right' PPI contributors, and advised caution when involving investigators' current patients.

### Conclusion

Engaging PPI contributors early and ensuring ongoing clarity about their activities, roles and goals, is crucial to PPI's success. Funders, reviewers, and regulators should recognise the value of pre-application PPI and allocate further resources to it. They should also consider whether PPI plans in grant applications match a trial's distinct needs. Monitoring and reporting PPI before, during, and after trials will help the research community to optimise PPI, although the need for ongoing flexibility in implementing PPI should also be recognised.

**Strengths and limitations of this study**

- This was the first study to examine whether plans for patient and public involvement (PPI), as documented in trialists' grant applications, were subsequently implemented.
- Semi-structured interviews with chief investigators and patients allowed us to identify challenges to implementing PPI, and lessons learnt, from a range of informant perspectives.
- The study benefited from the inclusion of a combination of trials which had ended at the time of the interviews, and those which were ongoing.
- Some informants struggled to recall events pertaining to PPI for trials which had ended - a drawback of retrospective study designs.
- We used a historical cohort of trials, funded four to eight years previously. The emphasis on PPI has grown over these years, thus our findings may not fully reflect the planning and implementation of PPI in trials funded more recently.

## Introduction

There are several schools of thought regarding why patient contributors should be involved as advisors or partners in health care research, rather than just as participants. Ethical and political arguments for patient partnerships are based upon values such as democracy, accountability and empowerment.[1-3] Alongside these values are pragmatic arguments which revolve around the belief that patient and public involvement (PPI) can enhance the relevance, validity, quality, and success of research.[1-5] The growth in PPI both nationally and internationally[6-8] is reflected by its increasing assimilation into grant applications, with funding bodies encouraging researchers to submit plans for PPI in order to obtain funding.[2, 9-12] Such developments have branched out into other realms including patient involvement in academic publishing, for instance within the BMJ.[13]

For PPI contributors, getting involved in research has been reported to lead to 'personal development' such as boosting confidence, empowerment and a sense of purpose.[14] Similarly there can be personal benefits for researchers who have reported that their attitudes, values and beliefs about the worth of PPI had been heightened as a result of such involvement.[15] However, as well as being a vehicle for improving research validity, there are indications that 'patient influence' can pose a potential threat to the validity of research if it is not drawn upon appropriately.[2] For example, PPI in technical decisions may result in worse as opposed to improved project outcomes.[16]

Challenges to the realisation of plans for PPI include debate regarding its purpose, lack of evidence regarding the impact of PPI, complexities in researchers and contributors sharing power, and difficulties in ensuring sufficient resources for PPI.[4, 10, 15, 17-19] Alongside such challenges are uncertainties regarding how best to plan PPI. Guidance drawing on the opinions and experiences of those involved in PPI activity within trials is available[17, 20] and a recent review has examined case studies of PPI in the design and conduct of trials.[21] However, the evidence base is limited in terms of the range of trials, researchers, and patients that have informed this previous work, and there has been no systematic evaluation of the extent to which trialists' intentions for PPI are put into practice. This is an important gap in view of the above challenges and the increased onus on researchers to build plans for PPI into their grant applications. Such plans run the risk of being uninformed due to the lack of evidence across a range of trial contexts and informant perspectives. In this paper we aim to inform practice for trialists and contributors by describing the extent to which documented PPI plans were implemented within a range of clinical trials and identifying the challenges met and the lessons learnt. Given that funding bodies encourage PPI, we also aim to

1  
2  
3 inform policy with regard to post-trial scrutiny of PPI in terms of processes, facilitators and barriers,  
4 and impacts.  
5  
6

## 7 8 **Methods**

### 9 **Terminology**

10 We use the term 'PPI contributors' or 'contributors' rather than the more commonly used term 'PPI  
11 representatives' to avoid implying that a few individuals can represent the perspectives of diverse  
12 patient groups and members of the public, and 'informants' to refer collectively to the researchers  
13 (primarily chief investigators (CIs)) and PPI contributors. We use the terms 'documented plans' to  
14 refer to the plans for PPI which were written into the funding application or study protocol and  
15 'expectations' to refer to what the trial team expected PPI to achieve, as described by the  
16 researchers during the interviews.  
17  
18  
19  
20  
21  
22  
23

### 24 **Design**

25 This qualitative study formed part of the 'Evidence base for Patient and public Involvement in  
26 Clinical trials' (EPIC) project. EPIC aimed to investigate PPI in a cohort of RCTs funded by the National  
27 Institute for Health Research (NIHR) Health Technology Assessment (HTA) programme between 2006  
28 and 2010. We have described the methods in full elsewhere.[22] In summary, EPIC comprised four  
29 phases. Phase 1 examined trialists' plans for PPI as described within their outline and full funding  
30 applications. Phase 2 was a questionnaire survey of chief investigators' (CIs) and PPI contributors'  
31 opinions and activities concerning PPI. Phase 3 involved qualitative interviews with CIs, PPI  
32 contributors and trial managers (TMs). Phase 4 examined the role of clinical trials units in identifying  
33 and supporting PPI activity in trials.  
34  
35  
36  
37  
38  
39  
40  
41

42 The current paper draws mostly on data from Phases 1 and 3 and, to a lesser extent, Phase 2. EPIC  
43 had a patient advisory group, consisting of five people with experience of being a patient or carer,  
44 previous PPI contribution in trials, and lay review of funding applications and membership of funding  
45 panels. The National Research Ethics Service (NRES) advised that EPIC did not require NRES ethics  
46 approval; we therefore sought and obtained a favourable ethical opinion from the University of  
47 Liverpool Research Ethics Committee (Ref: RETH000489).  
48  
49  
50  
51  
52

### 53 **Sampling and recruitment for semi-structured interviews**

54 We emailed CIs at the address given on their grant application form. We aimed for a diverse sample  
55 of CIs for interview, based on their responses to questions within the CI survey concerning  
56  
57  
58  
59  
60

1  
2  
3 motivations for including PPI and its perceived impact, although we ultimately invited all but three of  
4 the CIs who had responded to the survey and expressed an interest in being interviewed. Three CIs  
5 were not invited because of delays in responding to the survey. We identified and invited PPI  
6 contributors to be interviewed through the CIs, chairs of steering committees, and advertisements  
7 on PPI websites. Potential informants were sent an email with an information leaflet which included  
8 the purpose of the qualitative study.  
9  
10  
11  
12

13  
14 LD conducted semi-structured telephone interviews with informants between April 2013 and  
15 November 2013, seeking their views and experiences of PPI within their trial. The interviewer had a  
16 BSc and MRes in psychology, and previous experience and training of conducting and analysing  
17 qualitative interviews. Apart from the recruitment emails, the interviewer had not established a  
18 relationship with the participants prior to study commencement. LD was new to the field of patient  
19 involvement in research and sought to maintain an open minded approach in exploring its  
20 implementation in trials. The interviews were audio-recorded, transcribed, anonymised and checked  
21 for accuracy. The interviewer used topic guides which were reviewed by our patient advisory group,  
22 and developed in light of ongoing data analysis. The interviews were conversational in nature,  
23 enabling informants to freely describe their experiences and raise topics which we had not  
24 anticipated. Informants gave their informed consent for the interviews to be audio-recorded and  
25 analysed. During the interviews we asked all informants to describe the type of PPI activity that had  
26 taken place in the trial. In order to foster rapport between informant and interviewer we  
27 intentionally avoided direct questions about why any plans were not implemented. However, we did  
28 ask CIs whether they would do anything differently regarding PPI if they were to start the trial again.  
29 We asked PPI contributors about any challenges and explored their views on how PPI could be  
30 enhanced in future trials. No field notes or repeat interviews were undertaken.  
31  
32  
33  
34  
35  
36  
37  
38  
39  
40  
41  
42

#### 43 **Data sources**

44  
45 Primary sources of data were: trial documentation (full application forms, reviewer comments,  
46 detailed project descriptions and study protocols), from which we extracted data about plans for  
47 PPI; and CI and PPI contributor interview transcripts, from which we determined whether the  
48 documented plans were implemented. Secondary sources of data were: outline application forms; CI  
49 survey responses; and TM interview transcripts. We used the secondary sources in cases of  
50 ambiguity, i.e. where it was unclear from the primary sources whether aspects of a particular set of  
51 plans had been implemented. We also used the secondary sources to elucidate the illustrative  
52 examples that we present in the results below.  
53  
54  
55  
56  
57  
58  
59  
60

## Analysis

To be eligible for the current analysis at least one source of interview data was required from either the CI or PPI contributor, as well as the grant application documents from which we identified and extracted data regarding plans for PPI. To determine the extent to which these documented plans were implemented we focused equally on the qualitative data from the CI and PPI contributor interview transcripts. In cases of ambiguity we consulted the TM interview transcripts, where available. We focused on identifying and analysing patterns within the data, to inform our interpretations,[23] and as appropriate the criterion of catalytic validity whereby qualitative research should not just describe but aim to inform practice.[24] For the purposes of determining the PPI activity undertaken, challenges met and lessons learnt, one author (DB) first familiarised herself with the data by reading the transcripts several times, before drawing on the Framework technique[25] to develop and apply open codes to the interview data. She then grouped the codes into broader categories within the framework and compared these with data extracted from the documented plans. Other members of the EPIC team who were familiar with the interview transcripts and documented plans examined the early stages and ongoing refinements of the descriptive coding framework, as well as the tabulated comparisons of planned and implemented PPI. CG had analysed the CI survey and application forms,[22] and LD and BY had analysed the interview data to explore the perceived impact of PPI (Dudley et al 2014(a); under review; revision invited), thus providing confidence in the credibility and 'confirmability' of the present findings.[26] Moreover, DB analysed the interview transcripts before looking at the documented plans that had been extracted from the grant application forms, thus helping to reduce the chances that the documented plans would unduly influence her interpretations of informants' interview accounts of PPI. Transcripts were not returned to informants for 'member checking' as interpretation of such feedback is problematic.[27] A description of the coding frame is available upon request.

We provide illustrative quotes from a range of interviews and trial documents. Identification codes signify the source of informant quotes based on their group (i.e. CI or PPI contributor) followed by their anonymised trial identification number. Where more than one PPI contributor was interviewed for the same trial, we indicate as PPI 1 or PPI 2. Codes for documented plans refer to anonymised trial identification numbers. We replaced identifying text within quotes with anonymised text, and use [...] to signify abridged quotes.

1  
2  
3 In the sections that follow we refer to the three different types of PPI role, identified by our earlier  
4 analysis of informants' accounts of the impact of PPI on the trials (Dudley et al 2014(a); under  
5 review; revision invited). The identified PPI roles were: oversight, typically characterised by the  
6 formal presence of a PPI contributor on the trial steering committee (TSC), with infrequent  
7 involvement; managerial, also usually a formal role but with more regular involvement, for example  
8 as co-investigator or member of the trial management group; and responsive roles, which tended to  
9 be less formal, often with more than one contributor, or making use of advisory panels and focus  
10 groups as and when problems occurred.  
11  
12  
13  
14  
15  
16  
17  
18  
19

## 20 Results

### 21 PPI Plans: From intentions to actions

22 As illustrated in Figure 1, 28 trials were eligible for inclusion in the current analysis. We conducted  
23 interviews with both the CI and a PPI contributor in nine of the 28 trials, with the CI only in 12 trials,  
24 and with a PPI contributor only in seven trials. One PPI contributor was involved in two of the trials  
25 in this sample, while a further two trials had two PPI contributor interviews. We also conducted  
26 interviews with 10 TMs and consulted one of these transcripts where there was ambiguity in CI / PPI  
27 accounts regarding whether all plans for PPI had been implemented. Interviews lasted 45 minutes  
28 on average. Where multiple sources of interview data were available, e.g. from a CI and a PPI  
29 contributor, there were no major discrepancies between accounts.  
30  
31  
32  
33  
34  
35  
36

37 As shown in Table 1, all but three of the 28 trials had documented plans for PPI in their grant  
38 application or protocol or both. These documents varied greatly regarding the extensiveness of PPI  
39 activity planned and precision with which plans were described, from vague references to activities  
40 that hinted at PPI, "We will make use of two primary care research networks and an [intervention-  
41 specific] research network" (Trial 115), to statements that were quite precise, "The [Society]  
42 confirmed their willingness to represent their members through steering committee membership  
43 [...] and to help in the construction of the MREC application and patient information leaflets" (Trial  
44 102). Based on informants' interview accounts, all trials subsequently incorporated some form of PPI  
45 and it was clear from the interviews that documented plans were fully implemented in most (20/25)  
46 instances regardless of whether the plans were vague or precise, minimal, or extensive. The three  
47 trials without documented plans did proceed to include some PPI activity, perhaps prompted, to an  
48 extent, by comments from peer reviewers who had remarked on the lack of PPI plans in each case.  
49 This is particularly likely in Trial 2. Here, the grant application referred to pre-funding PPI and when  
50  
51  
52  
53  
54  
55  
56  
57  
58  
59  
60



1  
2  
3 interviewed the CI spoke of initial “tokenism” and “ignorance” about how PPI should work. A further  
4 three trials expanded on documented plans, giving a total of six trials which had seen addition or  
5 expansion of plans for PPI.  
6  
7

8  
9 Despite informants indicating that most of the documented plans for PPI had been implemented,  
10 some revealed no personal expectations for PPI and spoke of using it as a means of “ticking the right  
11 boxes”. This raises questions about the motivations behind the PPI plans in some grant applications.  
12 As noted, we had previously identified three types of PPI roles within our cohort of RCTs: oversight,  
13 managerial, and responsive,[22] and many trials built into their plans a combination of these roles.  
14 Based on informants’ accounts it appeared that six trials largely confined PPI to an oversight mode of  
15 involvement, although some had hinted at other modes in their applications. We begin by examining  
16 what happened in these trials.  
17  
18  
19  
20  
21  
22  
23

#### 24 **Oversight mode trials (n=6)**

25 Oversight mode trials were those which confined PPI input to membership of TSCs. Based on  
26 informant interview accounts, there were six trials that constrained PPI to this mode of involvement,  
27 although three of these had hinted at other modes in their applications. A further application had  
28 been too vague to discern the mode of planned PPI, and another had no documented plans for PPI  
29 (Table 1).  
30  
31  
32  
33  
34

35 Based on informants’ accounts, all trials which had documented plans for PPI membership on their  
36 TSC had implemented this aspect of the plans. Researcher interviews were available for four of these  
37 six oversight trials and of these four, only one researcher divulged any personal expectations for PPI  
38 in the trial. Moreover, informants’ accounts raise concerns about the motivations for including PPI in  
39 their applications and the danger of assuming that contributors know what is expected of them. For  
40 example, Trial 36 had named a “patient representative” as a member of the TSC at the application  
41 stage then subsequently, in direct response to peer reviewer comments, the team had indicated that  
42 they would consider increasing the number of “patient representatives” on the TSC from one to two,  
43 in order to provide "mutual support". The team proceeded to include two PPI contributors on the  
44 TSC, thereby achieving their documented plans. Despite having prior experience of PPI however, the  
45 researcher divulged no personal expectations for PPI within this particular trial and referred to PPI as  
46 a ‘tick box’ exercise:  
47  
48  
49  
50  
51  
52  
53  
54  
55  
56  
57  
58  
59  
60

1  
2  
3 "It was a requirement of... that we had representation on our steering committee and  
4 therefore I went through that [...] We can say [the PPI contributors] are there and therefore  
5 it's, if you like, ticking a political box." (CI 36)  
6  
7

8 The documentation for Trial 2 included no plans for PPI during the trial but did state that there had  
9 been "several stages of user involvement" prior to the grant application, "to confirm that the  
10 research question is pertinent to both the needs of the NHS and the NIHR programme of research  
11 development". Two grant reviewers commented on the lack of "service user representation" on the  
12 team and suggested membership "on the research team or steering group". The TSC did include PPI  
13 membership but during the interview the researcher spoke of his initial "tokenism" and "ignorance"  
14 about how PPI "should and could work". When asked about the expectations of their role, the PPI  
15 contributors in two other oversight trials (115 and 96) implied similar uncertainties when they spoke  
16 of not knowing what was expected of them and of feeling "bewildered" in meetings:  
17  
18  
19  
20  
21  
22

23 "I can't understand why they use me... they seem to find me useful but I just sit there  
24 bewildered. I'm there as a sort of grey background while the others do all the sparky stuff."  
25 (PPI 115)  
26  
27

28 In the next section we describe planned and implemented PPI in 14 trials which incorporated a  
29 managerial role of PPI. Unlike the six trials with a mainly oversight mode, many of the managerial  
30 mode trials had utilised more than one form of PPI.  
31  
32  
33

#### 34 **Beyond oversight, into managerial mode (n=14)**

35 Most of these 14 trials had indicated some type of managerial involvement in the documented  
36 plans, usually to include PPI contributors as co-investigators (Table 1). Two trials (4 and 27) did not  
37 have PPI contributors as co-investigators but planned to include PPI contributors on the trial  
38 management group, and interviews with informants indicated that this had been implemented. It  
39 was unclear in one ongoing trial whether there was a PPI co-investigator, but documented plans  
40 stated that a named PPI collaborator would be "directly involved in decision making of trial  
41 processes and then relay back information to user groups"; according to the PPI contributor  
42 interview these plans were being implemented (Trial 18). Trial 10 had no documented plans for PPI  
43 but the interview with the CI indicated that there was a PPI co-investigator (Trial 10).  
44  
45  
46  
47  
48  
49  
50

51 Informants' accounts indicated that all trials which had planned a managerial mode of PPI did  
52 implement it (Table 1). This included Trial 21, which had a PPI co-applicant and documented plans to  
53 involve user groups in developing information leaflets, consent forms, letters, and in questionnaire  
54 design. There was a budget for PPI travel and expenses which is perhaps indicative of careful  
55  
56  
57  
58  
59  
60

1  
2  
3 planning. The documented plans stated that “user and consumer groups were very keen that a user  
4 was a collaborator on the grant application”. The applicants also planned and included oversight PPI  
5 (TSC membership) and expanded beyond their plans to include contributors in recruitment, in the  
6 analysis and interpretation of results, and in dissemination. Although we could not pinpoint from the  
7 informant interviews exactly what prompted these additional PPI activities, the PPI contributor who  
8 we interviewed described his extensive previous experience in similar roles and noted that his role in  
9 this particular trial had “evolved”. He also explained that “I’m there because I want to change things”  
10 (PPI 21) and this pro-active approach may have contributed to the expansion of PPI in this particular  
11 trial. Correspondingly, the CI spoke of wanting the PPI contributors to “feel welcomed and valued as  
12 part of the group”, and had personal expectations for PPI that included PPI contributors helping with  
13 “running the study”, “disseminating the results” and that “they would stay involved” and “feel able  
14 to speak out and have their own opinion”:  
15  
16  
17  
18  
19  
20  
21  
22

23 “We wanted them to offer to do things that they felt they could do and feel happy to say if  
24 they didn’t feel they could do certain things that might come their way.” (CI 21)  
25  
26

27 There were several examples akin to this among trials incorporating a managerial mode of PPI, in  
28 which CIs reported having personal expectations for PPI or in which PPI contributors appeared to be  
29 an integral member of the research team. However, one of two exceptions was Trial 14, in which  
30 documented plans had been to involve a PPI co-applicant “with an academic interest in representing  
31 patients’ perspectives in the design and conduct of health care research”, adding that this individual  
32 would advise on “the development of processes and materials which take into account patient  
33 concerns”. Responses to the CI survey described the PPI contributor as “a serial patient  
34 representative”. When interviewed, the CI divulged no personal expectations regarding PPI  
35 contribution, describing it as a “tick box exercise”:  
36  
37  
38  
39  
40  
41  
42

43 “The funders were insistent on having patient representation and wanted to know what that  
44 representation was on your grant submission.” (CI 14)  
45  
46  
47

48 In summary, most trials which planned a managerial mode of PPI implemented it. However, as Trial  
49 14 shows, simply having a PPI co-investigator is not necessarily a guarantee of meaningful  
50 contribution if researchers have no expectations for PPI or if contributors are unable to provide the  
51 input that a particular trial requires, for example because they are selected out of convenience  
52 rather than to match trial needs. In the next section we focus on the less formal, responsive, form of  
53 PPI in which researchers “reach out” for specific PPI input as and when needed.  
54  
55  
56  
57  
58  
59  
60

**“Reaching out” - responsive roles (n=14)**

Fourteen trials embraced some form of responsive involvement, although trial documents for two (10 and 79) had not indicated any plans for PPI (Table 1). The remaining 12 had stated in their documented plans that they would, or already did, engage with PPI groups or panels rather than just with the one or two individuals that was typical of oversight and managerial PPI. Data from application forms, project descriptions and informant interviews showed that this responsive activity sometimes entailed seeking advice from PPI groups prior to the application for funding. Informants noted that many trialists continued to seek advice from such groups during the trial regarding specific issues. Other trials began a responsive approach once the trial had commenced, often as and when particular problems arose. Most trials implemented all aspects of their documented plans but in one case (Trial 76) it was unclear from the CI interview whether specific plans to seek advice of a new advisory group before recruitment were implemented.

Trial 20 used responsive alongside managerial PPI, including having a PPI co-applicant. The trial had ended at the time of the interviews, and the researcher stressed that the responsive PPI had been “crucial” when faced with specific problems. The CI explained that one PPI contributor would attend research team meetings:

“but I then reached out to other people in addition when we needed more help [...] I think what was crucial was being able to get input, not in terms of regular intervals but [...] when you’ve got a problem.” (CI 20)

Further illustrating the flexibility that responsive PPI allows, in her interview one of the PPI contributors on the same trial (who on this particular trial had a managerial role), advised researchers to “have some understanding” of the needs of PPI contributors. She then went on to refer to another contributor on the same trial who did not attend project meetings but who operated in a more responsive mode outside of meetings. It appeared this arrangement had evolved to accommodate the needs of the latter contributor, who, it seemed, found meetings difficult.

“She didn’t really know what to do, so I think it was much more a one-to-one conversation which is what she was happy with rather than sitting in a committee.” (PPI 20)

Documented plans for Trial 7 involved a combination of oversight, managerial and responsive modes. This trial was collecting outcome data at the time of the researcher interview, and PPI plans were being implemented including consultation with a panel of service users who advised on issues such as how to increase participant response rates to the outcome questionnaire, and on the

1  
2  
3 promotional material that accompanied it. When interviewed, the researcher spoke of her personal  
4 expectations that PPI would help to maximise recruitment, ensure the right outcomes were  
5 measured, and help in interpreting the findings. There was no PPI contributor interview but the  
6 researcher also spoke of having to tailor “different ways of involving people” in PPI depending on the  
7 “population of interest”:  
8  
9

10  
11  
12 “It might be children, people from disadvantaged groups or older people [...] so you  
13 probably have to find other tailored ways of including people to make it effective. So it’s not  
14 a one size fits all.” (CI 7)  
15  
16

17  
18 The majority of those researchers interviewed who described such ‘as and when’ contributions  
19 (10/12) spoke of expectations for PPI, and tended to view responsive modes as constructive. Only in  
20 one case (Trial 101) did the researcher allude to the PPI within their trial as a “tick box” exercise.  
21  
22

23  
24 Three trials undertook additional responsive PPI activity that had not been specified in their  
25 documented plans. Trials 21 and 102 expanded on their plans by involving PPI contributors in a  
26 broader range of activities than initially indicated, namely advising on recruitment and interpretation  
27 and dissemination of study findings. As with Trial 21 (described in the Managerial Mode section  
28 above), we could not determine from the CI interview why plans for Trial 102 had been expanded  
29 upon, and there was no PPI contributor interview for Trial 102 to help illuminate this issue. The PPI  
30 contributor for the third trial (Trial 91) mentioned that she sought the views of “women’s groups”.  
31 This was additional to the documented plans for her to be involved in “protocol design of the study”.  
32 As with Trial 21, this PPI contributor had previous PPI experience and appeared to be a particularly  
33 active member of the research team, and with considerable knowledge of the relevant health  
34 condition.  
35  
36  
37  
38  
39  
40  
41  
42

43  
44 In summary, most applicants implemented their documented plans for PPI regardless of the mode of  
45 planned involvement. In five cases we were unable to discern whether or not PPI plans were fully  
46 implemented, although some PPI was achieved in these trials. Regardless of whether PPI was  
47 implemented as planned or evolved, most trial teams faced challenges and learnt lessons about  
48 implementing PPI as they went along. We now turn to their accounts of this learning and then use  
49 these to derive practical advice for planning and implementing PPI.  
50  
51  
52  
53  
54

### 55 **Researchers on the challenges of PPI and lessons learnt**

56  
57  
58  
59  
60

1  
2  
3 Most CIs spoke of the challenges they encountered in implementing PPI (Table 2) and things they  
4 would do differently as a result. The involvement of trial investigators' own patients as contributors  
5 was perceived to lead to a "conflict" (CI 20) between an investigator's research and clinical roles.  
6 This brought a risk that research would "cross over into clinical care" (CI 6), and that such  
7 contributors would be "out of their depth" (CI 20) and find it difficult to "say something which might  
8 imply a criticism of their clinician" (CI 20). CIs talked about the problems of failing to engage PPI  
9 contributors fully or early enough to inform changes in study design, and "under-utilising" (CI 101)  
10 PPI contributors by not involving them in the planning stages, thereby making PPI less thorough or,  
11 as one informant noted, less "robust" (CI 101). They reflected on the potential detrimental  
12 consequences of such failings on the relationship between researcher and PPI contributors, for  
13 example being less likely to "form a bond and get loyalty" (CI 14). Finding and engaging the right  
14 people with an interest in and understanding of the research, and with the necessary confidence,  
15 commitment and impartiality was another major stumbling block:  
16  
17  
18  
19  
20  
21  
22  
23

24  
25  
26 "You hear that some consumers get involved [...] because they have a particular point of  
27 view or axe to grind [...] in those circumstances it could be very detrimental to a trial, to be  
28 driven by somebody who has had a bad experience [...] and those are the ones you don't  
29 want on your team. (CI 5)  
30

31 "You've got trialists in the [meeting] who are trained to run clinical trials. And then you've  
32 got one lay representative who may be slightly intimidated by everyone else, who'll not be  
33 able to truly give their views, may be slightly overawed." (CI 14)  
34  
35

36 Researchers also pointed to the practical difficulties that contributors experienced in attending  
37 meetings due to geographical distance or time constraints (Table 2). They emphasised how  
38 teleconferences could be less conducive to forming a relationship with PPI contributors than face-to-  
39 face meetings. They also reported problems relating to communication and mutual comprehension  
40 between themselves and PPI contributors. Some described PPI contributors as struggling to  
41 understand the nature of research, or the distinction between research and clinical practice, and one  
42 CI referred to his own "naivety" (CI 55) in underestimating how much training PPI contributors might  
43 need. CIs described difficulties getting other staff such as trial managers to understand or prioritise  
44 PPI. This included one CI who noted that some investigators are unable to "cope" with having a  
45 "working relationship with service users" and "can't let go of the fact that [they] are people they  
46 study":  
47  
48  
49  
50  
51  
52  
53

54  
55 "It's a mindset [...] an attitude where you have an equal partnership. You're working  
56 together not studying these people. You're asking for their expertise and I've found that  
57  
58  
59  
60

1  
2  
3 some people who've worked with me, that comes easily and some people absolutely never  
4 get it." (CI 20)  
5

6  
7 CIs remarked that they were unclear about what to expect in relation to PPI and worried about  
8 taking up the contributor's time. External forces also played a part in some cases: for example one CI  
9 described PPI contributors being "poached" by other studies, a "fight" with the university regarding  
10 paying a PPI contributor for his time, and disagreement with funders when a contributor wanted to  
11 add to the patient information sheet that he was a PPI contributor on the project (CI 21).  
12  
13

14  
15  
16 CIs spoke of how they had learnt as the trial went along, revealing that their "practice had evolved"  
17 (CI 14) and their skills had "changed beyond recognition [...] now we're much better equipped [...]  
18 but at the time when [trial] started we had very little idea at all about what PPI involved or how it  
19 would help or how it would work" (CI 2).  
20  
21  
22

23  
24  
25 In light of these challenges, CIs spoke of how in future they would involve more than one PPI  
26 contributor, in particular by using focus groups or panels of contributors rather than individual  
27 contributors, enlist the help of relevant charities, and conduct surveys or use social media when  
28 there was a "burning question" (CI 55). Use of responsive PPI rather than individual contributors was  
29 described as "gold standard" PPI (CI 14), as this avoided "the danger of having a single opinion" (CI  
30 76), provided structure for all parties, and helped to enhance the confidence of individual  
31 contributors.  
32  
33  
34

35  
36  
37 "I would certainly have more involvement and some kind of framework around it [...] a small  
38 user group and set boundaries [...] try to agree how often we should meet and what peoples'  
39 roles and responsibilities are [...] and provided more structure [...] to make them feel that  
40 their views are important, and their involvement is very important, I think that would go a  
41 long way to easing the process." (CI 41)  
42  
43

44  
45 Many CIs indicated that they would extend PPI in future by asking contributors to lead in the  
46 dissemination of findings to relevant groups, help in the development of research questions, study  
47 design, and involve PPI contributors as co-investigators. CIs placed particular emphasis on how  
48 "crucial" it was to have "early input" (CI 14):  
49  
50

51  
52 "The most useful things are [...] the design stage [...] RCTs you've got to plan ahead [...] after  
53 the development phase you shouldn't really be changing anything [...] it is during that  
54 development phase when decisions are being made." (CI 115)  
55  
56  
57  
58  
59  
60

1  
2  
3 “Early engagement and appreciation that their input into the question is really important [...] with retrospect and for the future studies [...] more involvement at the front end, less in the  
4 middle and more at the end.” (CI 2)  
5  
6  
7

8 Finally, CIs reflected on the importance of “thinking through” plans and being clear about whether,  
9 what and why PPI is needed for individual trials:  
10  
11

12 “Be clear about the link between particular methods [of PPI] and particular benefits and  
13 challenges [...] it’s not all the same, there are so many ways of doing it but you have to have  
14 good reasons for choosing how to do it.” (CI 20)  
15  
16

17 “I don’t think it should be automatic that there must be PPI involvement in every study, and  
18 different types of involvement are necessary for different parts of study. Having a core  
19 group is not necessarily the right thing because at different points there are different types  
20 of people and types of involvement that would be useful.” (CI 10)  
21  
22  
23

#### 24 **Contributors on the challenges of PPI and suggestions for improvement**

25 Most PPI contributors mentioned challenges or difficulties linked to their involvement in the trial  
26 which may inform future research teams in planning and implementing PPI. Some of the  
27 contributors’ challenges paralleled CIs’ accounts while others were unique to the contributors (Table  
28 2). While researchers referred to problems they had experienced in their communication with  
29 contributors, a prominent issue exclusively mentioned by contributors related to the problems they  
30 experienced with ‘jargon’ and the technical language that was used in trials such as statistical or  
31 medical terminology and acronyms. Several contributors suggested remedies such as supplying a list  
32 of acronyms or a booklet of research terms, or simply that “if they’re going to use jargon, explain it”  
33 (PPI 64). A further idea was that the person chairing meetings could try to ensure that discussion  
34 about statistical issues or other areas of technical expertise were translated and summarised  
35 adequately. Contributors talked about difficulties in interacting with researchers, including not  
36 always feeling listened to by everyone. One contributor who had been invited by her consultant and  
37 had previous experience of PPI implied that “some doctors” were unwilling to understand the  
38 perspectives of patients (PPI2 27). Another felt that female researchers were more understanding  
39 than males regarding problems with travelling or feelings of insecurity, while a further contributor  
40 alluded to how in meetings the team sometimes talked about patient experiences in a  
41 “dispassionate” way, and although this was not a problem for the individual contributor she felt it  
42 might be for others (PPI1 27).  
43  
44  
45  
46  
47  
48  
49  
50  
51  
52  
53  
54  
55  
56  
57  
58  
59  
60



1  
2  
3 Some of the challenges that contributors described echoed those that the CIs has raised. These  
4 included lack of clarity about roles, and the difficulties contributors experienced in attending  
5 meetings, for instance because of a health condition. Such practical difficulties could give rise to  
6 additional complexities. For one contributor, infrequent meetings meant “not much to build a  
7 relationship on” and while academics worked closely together, she had to “work quite hard to keep  
8 up” (PPI 16). Contributors also talked about wanting to be more involved in between annual  
9 meetings, in “shaping the bid” (PPI 20) so that it was less focused on the primary clinical outcome, in  
10 seeing the intervention itself, and to have initial briefing meetings at the outset of their involvement.  
11 Finally, one contributor described it as a “downfall” that he was not receiving feedback or ‘thank  
12 you’s’ and commented on how important it was to make PPI contributors “feel valued” (PPI 34).  
13  
14  
15  
16  
17  
18  
19  
20

## 21 Discussion

### 22 Main findings

#### 23 *The path to PPI: plans, actions and complications*

24 This is the first study to examine whether plans for PPI, as documented in RCT grant applications, are  
25 being implemented. Based on the accounts of researchers and PPI contributors we found that most  
26 trialists are indeed putting their plans to action, although in some cases the plans were minimal and  
27 relatively easy to execute. There were a few trials for which we were unable to confirm whether  
28 plans were implemented in full, but all did incorporate some PPI. Many trials implemented multiple  
29 modes of PPI, which is both surprising and encouraging given that PPI was less prominent when the  
30 proposals for the trials in this cohort were being developed. CIs encountered complications from  
31 which they learnt valuable lessons. Uncertainty about what to expect of PPI and emergent  
32 challenges with their trials meant that involvement had to evolve. Difficulties finding and retaining  
33 suitable contributors and engaging in PPI ‘too little too late’ led trialists to say they would do things  
34 differently in future. Many reflected on how they would aim for earlier engagement next time and  
35 seek involvement from a more diverse source such as patient panels or focus groups. PPI  
36 contributors themselves mentioned that becoming involved after the trial had begun, or  
37 infrequently, resulted in missed opportunities for them to contribute. Some referred to uncertainty  
38 about their role and many struggled with jargon, an enduring problem despite the availability of  
39 apparently straightforward solutions.  
40  
41  
42  
43  
44  
45  
46  
47  
48  
49  
50  
51

#### 52 *Pressured into PPI?*

53  
54  
55 Regardless of statements about PPI in their funding application some trialists had no expectations of  
56 what PPI might achieve, and their only motivation for including PPI was a belief that it was necessary  
57  
58  
59  
60

1  
2  
3 or would help to secure funding for their trial. Such strategic minimalism may be an inevitable side-  
4 effect of policies to promote or require PPI in trials. It may also reflect researchers' professed  
5 inexperience of PPI. A small number of trials did not have documented plans for PPI but all did  
6 nevertheless include some PPI, possibly influenced by reviewer and panel comments. However, one  
7 of these trials had been through several stages of PPI prior to the grant application and was  
8 requested to implement further PPI over the course of the trial. This highlights the predicament of  
9 researchers whose trial may have benefited from considerable PPI prior to funding (for example in  
10 feasibility and pilot work) and forecast that they would need relatively little PPI during the trial itself,  
11 only to find that funders insist on PPI at all stages. Many informants believed formative PPI prior to  
12 funding was one of the most useful, credible aspects of PPI. Particularly in cases where there has  
13 been extensive PPI prior to the main trial, it is important for all members of the research community  
14 to consider whether plans for ongoing PPI match the needs of a particular trial and at what stage(s)  
15 further PPI would be appropriate.  
16  
17  
18  
19  
20  
21  
22  
23

#### 24 25 26 **Previous research**

27 We found no previous reports on the extent to which documented plans for PPI within trials were  
28 subsequently implemented. There have been several accounts of challenges involved in  
29 implementing PPI which, while not in a trials context, endorse our findings. For instance, recent  
30 reports have referred to tokenism,[28, 29] or highlighted the potential challenges in identifying  
31 suitable individuals who are impartial and able to understand research methodologies, retain an  
32 interest, and commit long-term;[15, 17-19, 30] of researchers having little experience of PPI and  
33 being uncertain about what to expect;[15, 18, 31] and of jargon-related problems.[19, 32, 33]  
34 INVOLVE suggest that PPI contributors would benefit from a 'glossary of technical terms',[17] again  
35 something reflected in the suggestions from contributors within our study. Staley[4] refers to the  
36 challenge of ensuring that involvement is meaningful and not simply tokenistic. Findings from the  
37 EPIC project regarding PPI training needs suggest that while informants were broadly receptive to  
38 PPI training for researchers, there was considerable reluctance regarding the training of PPI  
39 contributors, with a preference for 'informal inductions' (Dudley et al 2014(b); under review;  
40 revision invited). The health services researchers in a previous qualitative interview study varied in  
41 how they interpreted PPI policy and in their PPI 'working practices' and referred to how PPI brought  
42 a 'fear of the unknown'. [31] This study also points to a 'know-do' gap, whereby researchers' talk of  
43 the importance and value of PPI in the 'ideal' world stood in contrast to their experiences of 'the  
44 reality' of implementing PPI in practice.[29] The timing of involvement has been recently  
45  
46  
47  
48  
49  
50  
51  
52  
53  
54  
55  
56  
57  
58  
59  
60

1  
2  
3 highlighted[3, 20] and is clearly an ongoing challenge which is exacerbated by financial and time  
4 constraints[8, 32] particularly during the grant-writing stage.  
5  
6

### 7 8 **Study limitations**

9 We used a historical cohort of trials that had been funded four to eight years ago. Even in that short  
10 time the emphasis on PPI has grown and our findings may not reflect the planning and  
11 implementation of PPI in trials funded more recently. Some of the trials in our sample were also  
12 initiated and completed some time before the interviews. However, this limitation is offset  
13 somewhat by the inclusion of ongoing trials in which PPI activity was more recent and therefore  
14 easier to recollect. There were five trials for which it was not possible to determine whether all  
15 documented PPI plans had been fully implemented or not. In some cases informants clearly  
16 struggled to recall events for trials which had ended several years previously or where researchers  
17 were involved in a number of trials simultaneously. We explored with informants how PPI  
18 contributors were involved in the trials but did not directly quiz CIs about why certain plans within  
19 their application were not implemented. This was intentional as we did not want to pose questions  
20 which may have seemed accusatory and have a detrimental impact on the rapport between  
21 informant and interviewer or risk informants becoming defensive. While some trialists seem to have  
22 expanded on their plans for PPI once the trial was underway there may, conversely, have been  
23 instances in which plans were not fully documented within the grant application.  
24  
25  
26  
27  
28  
29  
30  
31  
32  
33  
34

### 35 **Implications and tips for the trials community**

36 We have used the insights of informants to generate practical tips which may help future trialists  
37 and PPI contributors (Box 1). We envisage that these be considered alongside previously published  
38 guidance for PPI in trials[17, 20] and consensus principles for PPI in health research.[34, 35] The tips  
39 generated from evidence in our study cover the importance of early planning, of timely and flexible  
40 PPI, and of communication and clarification of roles. They also stress the need to consider the  
41 difficulties posed by the use of “jargon”, and problems contributors experience in understanding  
42 certain aspects of the research process. The difficulties contributors experience with specialist or  
43 technical terminology have been widely reported.[19, 32, 33] Our data suggest that this problem has  
44 existed for some considerable time, and we outline the practical solutions suggested by PPI  
45 contributors. The tips in Box 1 could be used to inform PPI training and could be helpful in other  
46 types of health research. Given that the usefulness of the points in Box 1 depends on researchers’  
47 willingness to genuinely engage with PPI, the tips we present might also assist funding bodies and  
48 grant reviewers in determining whether submitted plans are fit for purpose. A study of the UK health  
49  
50  
51  
52  
53  
54  
55  
56  
57  
58  
59  
60

1  
2  
3 and social care research community has recently informed the development of a Public Involvement  
4 Impact Assessment Framework (PiiAF), which emphasises the value of well thought-through  
5 planning before implementing PPI as well as the subsequent evaluation of its impact,[36] and  
6 INVOLVE[17] have emphasised the importance of clear guidance about roles. However, researchers  
7 also need some scope for flexibility and contingency in planning PPI: our finding that some trialists  
8 expanded their sometimes already detailed plans supports the need for flexible and iterative  
9 approaches to PPI in order to accommodate the unexpected and respond to opportunities and  
10 difficulties as they arise.  
11  
12  
13  
14  
15  
16  
17  
18  
19  
20  
21  
22  
23  
24  
25  
26  
27  
28  
29  
30  
31  
32  
33  
34  
35  
36  
37  
38  
39  
40  
41  
42  
43  
44  
45  
46  
47  
48  
49  
50  
51  
52  
53  
54  
55  
56  
57  
58  
59  
60

**Box 1 Tips for planning and implementing PPI in clinical trials****Early PPI***"You've got to plan ahead"*

- Begin planning PPI and consulting with contributors when starting to plan the trial
- Consider including PPI contributors in managerial roles e.g. as co-investigators

Researchers and PPI contributors emphasised how early and regular involvement allowed contributors to input more effectively. PPI prior to the trial (for example in contributions to grant writing, trial design, feasibility studies) was a key aspect of PPI, and in some cases the most important one.

**Flexible PPI***"One size does not fit all" "Reaching out was crucial"*

- Consider whether oversight PPI (e.g. on a TSC) is sufficient to meet trial needs
- Involve more than one or two PPI contributors, more than once or twice a year
- 'Reach out' and make use of multiple modes of PPI, including responsive PPI

PPI is context-specific so it is important to tailor PPI to the emergent needs of trials and be creative to encourage active engagement. Researchers felt that involving contributors beyond an oversight role, i.e. not just as a member of the steering committee but in a managerial or responsive capacity helped to foster meaningful PPI. In terms of responsive PPI, liaison with relevant patient panels or groups may be particularly helpful when more diverse perspectives or wider consensus is needed; individuals might also consider whether surveys (e.g. of support group members) would be useful in answering 'burning questions' for example regarding the acceptability of timing or format of interventions or data collection.

**Communication, clarification, and interaction***"I can't understand why they use me. I just sit there bewildered"*

- Negotiate with contributors at an early stage about what they can bring to the trial and what they want to bring
- Determine whether this matches the trial's needs and clarify roles and expectations
- Be sensitive to contributors' needs and preferences

Communication between researchers and PPI contributors is crucial at the outset to clarify roles and expectations, and throughout the trial to optimise engagement and provide feedback about contributions. It may be that particular contributors do not have the insights a trial needs, or maybe trialists need to rethink their plans for PPI in the light of experience. Researchers should avoid seeming "dispassionate" during meetings when discussing a particular illness or condition that impacts on the lives of PPI contributors, and make a genuine effort to understand contributors' points of view.

**Language of research***"Break it down into a language everybody understands."*

- Minimise and explain jargon
- Provide glossaries and 'translations' where applicable

Researchers and contributors should discuss their written and verbal communication preferences and how to minimise and explain jargon. Suggestions for minimising jargon included lists of acronyms or

glossaries of research terms. PPI contributors should be prepared to speak up if there is a problem and, with the help of researchers, be willing to acquaint themselves with specialist terms over time.

### **Budgeting for PPI**

*"University didn't want to pay him the money" "We had money in the pot but only for one PPI"*

- Budget for PPI – think about contributors' time plus expenses
- Explore opportunities for pre-trial support for PPI

Well thought-through plans will help inform how much to 'cost in' for PPI. Consult with administrators in your organisation at an early stage to iron out processes for payments to PPI contributors. Talk to contributors to make sure they will be happy to accept reimbursement beyond expenses. Find out whether there are any local or national resources to support PPI prior to funding applications.

### **Fit for purpose PPI**

*"The person we chose had very little engagement, it struck me as a complete waste of time"*

- Agree what types of PPI would be appropriate and understand why
- Consider benefits of involving those with experience of the condition
- Recognise potential drawbacks of involving those under current care of the researcher

Think through plans for PPI and centre them round the aims and needs of the trial. Agreement about and understanding of *what* and *why* PPI is needed will help in planning it. Involving people with experience of the condition, intervention or service where applicable may be particularly germane in identifying research priorities and enhancing trial design. However, the inclusion of patients under the current care of a team member may lead to difficulties for both researchers and contributors.

### **Ticking several boxes could equate to expensive token gestures: Implications for funders**

Our findings endorse recent revisions to the NIHR's standard application form, which now require applicants to clearly define their proposed PPI activity. Asking researchers to specify and explain the type of involvement they envisage and what they expect it to achieve is a step in the right direction and should help to minimise "tick box" tactics and token gestures. However, the risk of strategic minimalism remains if plans are not afforded careful, context-specific consideration by funders and reviewers. Equally, there is a risk of inadvertent PPI profligacy, that is, the encouragement of elaborate plans for PPI that are disproportionate to the needs of a trial. Ticking several boxes rather than just one box could equally be a token gesture, as well as an expensive one. Therefore, researchers might be encouraged to think just as much about *why*, *how* and *when* PPI will be useful, as about *what* and *how much* PPI.

Researchers are also now asked to describe, in their grant applications, any PPI activity that they have undertaken prior to submitting the application. Funding is available to support pre-application PPI, for example the UK-based NIHR Research Development Service offers very small grants, which

1  
2  
3 others have found to be helpful.[37, 38] However, these grants are not easily or quickly accessible,  
4 particularly for those working to the typically tight deadlines of funding calls. Paradoxically, this  
5 renders pre-application PPI the most difficult to implement, even though our findings indicate that it  
6 is often most useful at this stage. Innovative organisations that involve patients at a meta-trial level  
7 in research priority setting [http://www.lindalliance.org/Patient\\_Clinician\\_Partnerships.asp](http://www.lindalliance.org/Patient_Clinician_Partnerships.asp) and in  
8 schemes such as COMET (Core Outcome Measures in Effectiveness Trials)[39, 40] which promotes  
9 the involvement of patients in developing “core outcome sets”, are providing knowledge and  
10 resources that individual trials can use. However, at the level of individual trials infrastructural  
11 support for early PPI is also needed. While there have been innovations in this area, for example the  
12 US-based Patient-Centred Outcomes Research Institute has recently announced a number of  
13 ‘Pipeline to Proposals’ Engagement Awards,[6] such moves are relatively novel, and similar steps by  
14 other organisations would be beneficial. As well indicating the need for structures and resources to  
15 support PPI, our findings point to the importance of PPI that is fit for purpose, realistic and  
16 proportionate. We found that trialists who fully implemented a primarily oversight mode of PPI  
17 perceived little value in this involvement – a related article from our study will fully explore the  
18 perceived impact of PPI in this cohort (Dudley et al 2014(a); under review; revision invited). While  
19 oversight PPI seemed limited in terms of its practical impact, arguably it may serve important ethical  
20 and moral functions. However, in order to avoid inadvertently promoting PPI that is devoid of any  
21 function for both researchers and contributors, as we note above, funders should take full account  
22 of any PPI which has taken place prior to funding applications as well as encourage applicants to  
23 justify future plans for involvement. The NIHR HTA programme states: “*While patient and public  
24 involvement (PPI) may not always be needed for all types of research, it is always relevant for HTA  
25 trials.*” [http://www.nets.nihr.ac.uk/  
26 data/assets/pdf\\_file/0003/77160/Preparing-a-full-application-  
27 for-the-Clinical-Trials-and-Evaluation-Board.pdf](http://www.nets.nihr.ac.uk/data/assets/pdf_file/0003/77160/Preparing-a-full-application-for-the-Clinical-Trials-and-Evaluation-Board.pdf) (last accessed 09 March 2014). Even if there is  
28 consensus that PPI is relevant for all trials, it may not be relevant at all stages of all trials. Equally,  
29 funders may wish to contemplate how ‘contingency’ resources could be made available for those  
30 trials that encounter unexpectedly intense needs for PPI over the course of their implementation.  
31  
32  
33  
34  
35  
36  
37  
38  
39  
40  
41  
42  
43  
44  
45  
46  
47

48 Our findings add fuel to recent drives and initiatives to promote the assessment and reporting of PPI  
49 processes[6, 28, 30] [http://www.journalslibrary.nihr.ac.uk/authors/report-preparation/report-  
50 contents/14](http://www.journalslibrary.nihr.ac.uk/authors/report-preparation/report-contents/14) including the GRIPP checklist.[41] The CONSORT (Consolidated Standards of Reporting  
51 Trials) Statement, which was established specifically to encourage adequate reporting of RCTs, does  
52 not cover PPI. We suggest that consideration be given to incorporating advice on reporting of PPI in  
53 the main CONSORT checklist, so that reference to PPI is incorporated *within* the main reports of  
54  
55  
56  
57  
58  
59  
60

1  
2  
3 trials, alongside separate detailed reports on PPI, in line with the GRIPP checklist. If, in planning their  
4 PPI, trialists are prepared to consider and report its outcomes not only in terms of what happened  
5 and how, but also how this matched the needs of the trial, whether any complications arose or  
6 adaptations were made, and what lessons were learnt, then the evidence base will grow and the  
7 research community as a whole can learn. The EPIC project has highlighted the value of listening to  
8 the accounts of PPI contributors as well as researchers, and this should feed into the evaluation and  
9 reporting of PPI.  
10  
11  
12  
13

### 14 **Conclusions**

15  
16 While most trialists fully implemented their documented plans for PPI there were traces of a  
17 minimalist approach. Planning and engaging PPI contributors early, and beyond a primarily oversight  
18 role, seems to be the most salient message from this analysis. At the same time some degree of  
19 flexibility within plans is prudent, and making allowances for the unexpected may help all  
20 stakeholders to make the most of PPI. The involvement of investigators' current patients as PPI  
21 contributors should be given cautious consideration as there is the potential for conflict between  
22 clinical and research roles. PPI activity prior to funding is as integral to meaningful involvement as  
23 PPI activity during trials, and more so in some cases. Proper and flexible planning by research teams  
24 will be instrumental in helping them to monitor, adapt and report PPI during and after trials, and in  
25 helping the research community as a whole learn how to optimise PPI.  
26  
27  
28  
29  
30  
31  
32  
33  
34  
35  
36  
37  
38  
39  
40  
41  
42  
43  
44  
45  
46  
47  
48  
49  
50  
51  
52  
53  
54  
55  
56  
57  
58  
59  
60



**What is already known?**

\* PPI is becoming an expectation and often a pre-requisite for research funding and favourable ethical opinions

\* While the evidence base for PPI has recently grown, many unknowns remain, particularly in relation to PPI in clinical trials

\* There has been no systematic investigation of the extent to which documented plans for PPI in trials are ultimately put into practice, the challenges faced along the way, or subsequent lessons learnt

**What does this study add?**

\* In our study of funded clinical trials, almost all put their documented plans for PPI into practice

\* Trialists learnt that a chiefly oversight role and late initiation of PPI were often inadequate and that involving current patients of the trial team as PPI contributors can be problematic

\* PPI activity prior to, and alongside the development of, grant applications should be more widely acknowledged, encouraged and resourced

\* Trialists' plans for PPI will benefit from built-in flexibility in order to undertake 'as and when', purposeful engagement

**Department of Health Disclaimer:**

The views and opinions expressed therein are those of the authors and do not necessarily reflect those of the HS&DR, NIHR, NHS or the Department of Health.

**Acknowledgements**

We acknowledge the help and support of the NIHR HTA in establishing the cohort documentation. Alison Allam, Philip Bell, Heather Goodare and Alison Walker formed the EPIC Patient Advisory Group. All members commented upon the interview schedules and manuscript. We also acknowledge the late Neil Formstone, former member of the advisory group.

**Competing interests:** All authors have completed the ICMJE uniform disclosure form at [www.icmje.org/coi\\_disclosure.pdf](http://www.icmje.org/coi_disclosure.pdf). BH reports grants from the National Institute for Health Research, during the conduct of the study. BH received personal fees from NIHR, the Medical Research Council, and the User Involvement Shared Learning Group. DB, LD, CG. JP and PW have nothing to disclose.

**Transparency declaration:** the lead author (the manuscript's guarantor) affirms that the manuscript is an honest, accurate, and transparent account of the study being reported; that no important aspects of the study have been omitted; and that any discrepancies from the study as planned have been explained.

**Funding:** The study was jointly funded by NIHR HS&DR and INVOLVE (project number 10/2001/29). The study was conducted independently of the funders and competing interests have been declared. The University of Liverpool were sponsors of the project.

**Copyright:** the Corresponding Author has the right to grant on behalf of all authors and does grant on behalf of all authors, an exclusive licence (or non-exclusive for government employees) on a worldwide basis to the BMJ Publishing Group Ltd to permit this article (if accepted) to be published in BMJ editions and any other BMJ PGL products and sublicenses such use and exploit all subsidiary rights, as set out in our licence.

**Data sharing statement:** no additional data available.

**Author contribution statement:**

Deborah Buck was involved in conducting qualitative data analysis and interpretation, and writing the manuscript.

Carrol Gamble conceived the idea for the research, led the development of the grant application and project, developed the interview schedules, contributed to interpretation, reviewed drafts of the manuscript, and agreed the final version of the manuscript.

Louise Dudley was involved in developing the interview schedules, recruiting informants to the study, conducting the qualitative interviews, interpreting the findings, reviewing drafts of the manuscript and agreeing the final version of the manuscript.

Jennifer Preston contributed to the project specification, development of the interview schedules, interpretation of the findings, commented on the manuscript and led the coordination of the EPIC Patient Advisory Group.

Bec Hanley contributed to the project specification, commented on the manuscript and co-led the coordination of the EPIC Patient Advisory Group.

Paula Williamson contributed to the project specification and provided comments on the manuscript.

Bridget Young contributed to the grant application and project specification, designed the qualitative components, led in all aspects of their development, implementation, analysis and interpretation, reviewed all drafts of the manuscript, and agreed the final version of the manuscript.

## References

1. Gradinger F, Britten N, Wyatt K, et al. Values associated with public involvement in health and social care research: a narrative review. *Health Expect* 2013 doi: 10.1111/hex.12158
2. Stewart R, Liabo K. Involvement in research without compromising research quality. *Journal of Health Services Research & Policy* 2012;**17**(4):248-51 doi: DOI 10.1258/jhsrp.2012.011086
3. Barber R, Beresford P, Boote J, et al. Evaluating the impact of service user involvement on research: A prospective case study. *Int J Consumer Studies* 2011;**35**:609-15
4. Staley K. Exploring impact: Public involvement in NHS, public health and social care research. 2009. [http://www.invo.org.uk/wp-content/uploads/2011/11/Involve\\_Exploring\\_Impactfinal28.10.09.pdf](http://www.invo.org.uk/wp-content/uploads/2011/11/Involve_Exploring_Impactfinal28.10.09.pdf) (accessed 31 March 2014)
5. Goodare H, Smith R. The rights of patients in research. *Bmj* 1995;**310**(6990):1277-8
6. Selby JV, Lipstein SH. PCORI at 3 years--progress, lessons, and plans. *The New England journal of medicine* 2014;**370**(7):592-5 doi: 10.1056/NEJMp1313061
7. Snape D, Kirkham J, Preston J, et al. Exploring areas of consensus and conflict around values underpinning public involvement in health and social care research: a modified Delphi study. *BMJ Open* 2014;**4**(1):e004217 doi: 10.1136/bmjopen-2013-004217
8. Saunders C, Girgis A. Status, challenges and facilitators of consumer involvement in Australian health and medical research. *Health Res Policy Syst* 2010;**8**:34 doi: 10.1186/1478-4505-8-34
9. Hull D, Barton D, Guo K, et al. Patient and public involvement to support liver disease research. *Br J Nurs* 2012;**21**(16):972-6
10. Robinson L, Newton J, Dawson P. Professionals and the public: power or partnership in health research? *J Eval Clin Pract* 2012;**18**(2):276-82 doi: 10.1111/j.1365-2753.2010.01572.x
11. Department of Health. Best Research for Best Health: A new national health research strategy. 2006. London: Department of Health.
12. National Institute of Health Research. Patient and public involvement. Available: <http://www.nets.nihr.ac.uk/ppi> Accessed 5 December 2013.
13. Godlee F. Towards the patient revolution. *BMJ* 2014;**348**:g1209 doi: 10.1136/bmj.g1209
14. Simpson A, Jones J, Barlow S, et al. Adding SUGAR: service user and carer collaboration in mental health nursing research. *J Psychosoc Nurs Ment Health Serv* 2014;**52**(1):22-30 doi: 10.3928/02793695-20131126-04
15. Mockford C, Staniszewska S, Griffiths F, et al. The impact of patient and public involvement on UK NHS health care: a systematic review. *Int J Qual Health Care* 2012;**24**(1):28-38 doi: 10.1093/intqhc/mzr066
16. Khwaja AI. Is increasing community participation always a good thing? *Journal of the European Economic Association* 2004;**2**:10

17. INVOLVE. Public involvement in clinical trials: Supplement to the briefing notes for researchers. 2012. Eastleigh: INVOLVE.
18. Vale CL, Thompson LC, Murphy C, et al. Involvement of consumers in studies run by the Medical Research Council Clinical Trials Unit: results of a survey. *Trials* 2012;13:9 doi: 10.1186/1745-6215-13-9
19. Boote J, Baird W, Beecroft C. Public involvement at the design stage of primary health research: a narrative review of case examples. *Health Policy* 2010;95(1):10-23 doi: 10.1016/j.healthpol.2009.11.007
20. Evans BA, Bedson E, Bell P, et al. Involving service users in trials: developing a standard operating procedure. *Trials* 2013;14:219 doi: 10.1186/1745-6215-14-219
21. Boote J, Baird W, Sutton A. Public involvement in the design and conduct of clinical trials: a review. *Int J Interdisciplinary Social Sciences* 2011;5(11):91-111
22. Gamble C, Dudley L, Allam A, et al. Patient and public involvement in the early stages of clinical trial development: a systematic cohort investigation. *BMJ Open* 2014;4:e005234. doi:10.1136/bmjopen-2014-005234
23. Braun V, Clarke V. Using thematic analysis in psychology. *Qualitative Research in Psychology* 2006;3(2):83 doi: 10.1191/1478088706qp063oa
24. Salmon P, Peters S, Rogers A, et al. Peering through the barriers in GPs' explanations for declining to participate in research: the role of professional autonomy and the economy of time. *Fam Pract* 2007;24(3):269-275 doi: 10.1093/fampra/cmm015
25. Ritchie J, Spencer L. Qualitative data analysis for applied policy research. In: Burgess RG, Bryman A, eds. *Analyzing Qualitative Data*. London: Routledge:173-94
26. Shenton AK. Strategies for ensuring trustworthiness in qualitative research projects. *Education for Information* 2004;22:63-75
27. Mays N, Pope C. Qualitative research in health care. Assessing quality in qualitative research. *BMJ* 2000;320:50-52
28. Snape D, Kirkham J, Britten N, et al. Exploring perceived barriers, drivers, impacts and the need for evaluation of public involvement in health and social care research: a modified Delphi study. *BMJ Open* 2014;4(6):e004943 doi: 10.1136/bmjopen-2014-004943
29. Ward PR, Thompson J, Barber R, et al. Critical perspectives on 'consumer involvement' in health research: Epistemological dissonance and the know-do gap. *J Sociology* 2010;46(1):63-82 doi: 10.1177/1440783309351771
30. Mathie E, Wilson P, Poland F, et al. Consumer involvement in health research: a UK scoping and survey. *International Journal of Consumer Studies* 2014;38(1):35-44 doi: 10.1111/ijcs.12072
31. Thompson J, Barber R, Ward PR, et al. Health researchers' attitudes towards public involvement in health research. *Health Expect* 2009;12(2):209-220 doi: 10.1111/j.1369-7625.2009.00532.x

- 1  
2  
3  
4 32. Staniszewska S, Jones N, Newburn M, et al. User involvement in the development of a research  
5 bid: barriers, enablers and impacts. *Health Expect* 2007;10(2):173-83 doi: 10.1111/j.1369-  
6 7625.2007.00436.x  
7
- 8 33. Hewlett S, Wit M, Richards P, et al. Patients and professionals as research partners: challenges,  
9 practicalities, and benefits. *Arthritis Rheum* 2006;55(4):676-80 doi: 10.1002/art.22091  
10
- 11 34. Boote J, Barber R, Cooper C. Principles and indicators of successful consumer involvement in NHS  
12 research: results of a Delphi study and subgroup analysis. *Health Policy* 2006;75(3):280-297 doi:  
13 10.1016/j.healthpol.2005.03.012  
14
- 15 35. Telford R, Boote JD, Cooper CL. What does it mean to involve consumers successfully in NHS  
16 research? A consensus study. *Health Expect* 2004;7(3):209-220 doi: 10.1111/j.1369-  
17 7625.2004.00278.x  
18
- 19 36. PiiAF Study Group. The Public Involvement Impact Assessment Framework: executive Summary.  
20 Available: <http://piiaf.org.uk/documents/exec-summary-0114.pdf> Accessed 5 March 2014.  
21
- 22 37. Boote JD, Twiddy M, Baird W, et al. Supporting public involvement in research design and grant  
23 development: a case study of a public involvement award scheme managed by a National Institute  
24 for Health Research (NIHR) Research Design Service (RDS). *Health Expect* 2013 doi:  
25 10.1111/hex.12130  
26
- 27 38. Walker DM, Pandya-Wood R. Can research development bursaries for patient and public  
28 involvement have a positive impact on grant applications? A UK-based, small-scale service  
29 evaluation. *Health Expect* 2013 doi: 10.1111/hex.12127  
30
- 31 39. Williamson P, Clarke M. The COMET (Core Outcome Measures in Effectiveness Trials) Initiative:  
32 Its Role in Improving Cochrane Reviews. *The Cochrane database of systematic reviews*  
33 2012;5:Ed000041 doi: 10.1002/14651858.ed000041  
34
- 35 40. Williamson PR, Altman DG, Blazeby JM, et al. Developing core outcome sets for clinical trials:  
36 issues to consider. *Trials* 2012;13:132 doi: 10.1186/1745-6215-13-132  
37
- 38 41. Staniszewska S, Brett J, Mockford C, et al. The GRIPP checklist: strengthening the quality of  
39 patient and public involvement reporting in research. *Int J Technol Assess Health Care*  
40 2011;27(4):391-9 doi: 10.1017/S0266462311000481  
41  
42  
43  
44  
45  
46  
47  
48  
49  
50  
51  
52  
53  
54  
55  
56  
57  
58  
59  
60

1  
2  
3  
4  
5  
6  
7  
8  
9  
10  
11  
12  
13  
14  
15  
16  
17  
18  
19  
20  
21  
22  
23  
24  
25  
26  
27  
28  
29  
30  
31  
32  
33  
34  
35  
36  
37  
38  
39  
40  
41  
42  
43  
44  
45  
46  
47  
48  
49

**Table 1 Summary of planned and implemented PPI activity by type of role**

|                                                                                                                 |
|-----------------------------------------------------------------------------------------------------------------|
| Based on informants’ accounts, it was unclear whether the trial fully implemented or was implementing all plans |
| Based on informants’ accounts, the trial did what planned in that PPI had been or was being fully implemented   |
| n/a No documented plans                                                                                         |

| Trial id<br>Status (trial ended or ongoing)<br>Mode(s)    | Summary of planned activity*                                                                                                                                                                                                                       | PPI plans fully implemented?<br>Y=yes<br>U=unclear | Accounts of ‘actual’ PPI activity**                                                                                                                                                                                                                                                                    |
|-----------------------------------------------------------|----------------------------------------------------------------------------------------------------------------------------------------------------------------------------------------------------------------------------------------------------|----------------------------------------------------|--------------------------------------------------------------------------------------------------------------------------------------------------------------------------------------------------------------------------------------------------------------------------------------------------------|
| <b>a) Trials which had a chiefly oversight mode (n=6)</b> |                                                                                                                                                                                                                                                    |                                                    |                                                                                                                                                                                                                                                                                                        |
| 115<br>Ended<br>Oversight                                 | Unclear whether trial had PPI co-applicants although service user contributed to the proposal.<br>“We will make use of two primary care research networks and an exercise research network.”                                                       | U                                                  | Had PPI membership on TSC but unclear in terms of “making use of research networks”. CI had expectations for and prior experience of PPI; no challenges. PPI contributor had prior experience of PPI; challenges (problems getting to meetings because of health).                                     |
| 36<br>Ongoing<br>Oversight                                | No PPI co-applicants.<br>Patient rep was named as a member of the TSC.<br>In response to referee comments, applicants stated they would consider increasing the number of PPI contributors on the TSC from one to two "to provide mutual support". | Y                                                  | Has 2 PPI contributors on TSC but CI talked of “no direct impact” and “ticking a political box”. CI had no expectations for but had prior experience of PPI; challenges (“only very minor such as patient rep not having email”). PPI contributor had no prior experience of PPI; challenges (jargon). |
| 65<br>Ended<br>Oversight                                  | No PPI co-applicants.<br>“We will have lay representation on the TSC.<br>We will use the expertise and contacts of our panel to form focus groups to assist in the understanding and dissemination of findings.”                                   | U                                                  | Had PPI membership on TSC as planned but unclear whether implemented plans regarding the use of the panel/focus groups to understand/disseminate findings. CI felt no direct PPI involvement overall. CI                                                                                               |

|                                                                      |                                                                                                                                                                                                                                                                                                                                                                                                                                                                                                                                                                                                                             |     |                                                                                                                                                                                                                                                                                                                                                                                                                                                                       |
|----------------------------------------------------------------------|-----------------------------------------------------------------------------------------------------------------------------------------------------------------------------------------------------------------------------------------------------------------------------------------------------------------------------------------------------------------------------------------------------------------------------------------------------------------------------------------------------------------------------------------------------------------------------------------------------------------------------|-----|-----------------------------------------------------------------------------------------------------------------------------------------------------------------------------------------------------------------------------------------------------------------------------------------------------------------------------------------------------------------------------------------------------------------------------------------------------------------------|
|                                                                      |                                                                                                                                                                                                                                                                                                                                                                                                                                                                                                                                                                                                                             |     | had no expectations for but had prior experience of PPI; challenges (getting the right people engaged; difficult target population; unable to get enough early engagement to inform changes to study design). No PPI contributor interview.                                                                                                                                                                                                                           |
| 2<br>Ongoing<br>Oversight                                            | No PPI co-applicants.<br>No documented plans. Did refer to PPI that had occurred prior to grant application.                                                                                                                                                                                                                                                                                                                                                                                                                                                                                                                | n/a | Has PPI membership on TSC. CI had no expectations for but had prior experience of PPI although spoke of initial “tokenism” and “ignorance” about what to expect of PPI in current trial; challenges (“just the slight feeling that we were taking up her time”). No PPI contributor interview.                                                                                                                                                                        |
| 64<br>Ended<br>Oversight                                             | No PPI co-applicants.<br>“We have identified two people with [condition] who have agreed to be consumer reps and have advised on the development of this proposal.”                                                                                                                                                                                                                                                                                                                                                                                                                                                         | Y   | No CI interview. Had PPI membership on TSC. PPI contributor had no prior experience of PPI; challenges (jargon, unable to attend all the meetings, some team members were felt to lack understanding).                                                                                                                                                                                                                                                                |
| 96<br>Ongoing<br>Oversight                                           | No PPI co-applicants.<br>“A patient representative will provide input into the design of patient literature and trial presentations to a general audience as well as providing a patient’s perspective at TSC and [Data Monitoring and Ethics Committee] meetings. TSC will meet two to three times a year.”                                                                                                                                                                                                                                                                                                                | Y   | No CI interview. Has PPI membership on TSC. “Keep in contact” approximately twice a year. PPI contributor had no prior experience of PPI; no challenges.                                                                                                                                                                                                                                                                                                              |
| <b>b) Trials which included a managerial mode (n=14)<sup>‡</sup></b> |                                                                                                                                                                                                                                                                                                                                                                                                                                                                                                                                                                                                                             |     |                                                                                                                                                                                                                                                                                                                                                                                                                                                                       |
| 20<br>Ended<br>Managerial +<br>responsive                            | Had a PPI co-applicant.<br>“The research team will convene a steering group of research and service users. This will meet three times during the study and will provide an opportunity for the research team to consult about research design and methods for data collection, choice of outcomes and methods for data analyses. The TSC will have an important role in interpreting initial findings and developing dissemination strategies. Consultation with young people and parents will be carried out in intervention and comparison clinics using focus groups. The views gathered in these groups will inform the | Y   | Had input from four PPI contributors at different times. Membership on TSC. Sought additional input when struggling with particular issues. CI had expectations for and prior experience of PPI; challenges (having a contributor who was a patient of the lead PI - “conflict of roles”; frustration at inability to integrate contributors’ ideas regarding questionnaire which was a validated instrument and therefore could not be altered.) PPI contributor had |



|                                                            |                                                                                                                                                                                                                                                                                                                                                                                                                                                                                                                                                                                                                                                                                                                     |   |                                                                                                                                                                                                                                                                                                                                                                                                                                                             |
|------------------------------------------------------------|---------------------------------------------------------------------------------------------------------------------------------------------------------------------------------------------------------------------------------------------------------------------------------------------------------------------------------------------------------------------------------------------------------------------------------------------------------------------------------------------------------------------------------------------------------------------------------------------------------------------------------------------------------------------------------------------------------------------|---|-------------------------------------------------------------------------------------------------------------------------------------------------------------------------------------------------------------------------------------------------------------------------------------------------------------------------------------------------------------------------------------------------------------------------------------------------------------|
|                                                            | development of research procedures (e.g. consent, outcome measures), tools for data collection and the process evaluation. Focus groups will also provide opportunity for young people to contribute to interpretation of study findings. Further consultation with young people will involve piloting all research tools to ensure acceptability and appropriateness.”                                                                                                                                                                                                                                                                                                                                             |   | no prior experience except as charity member; no challenges.                                                                                                                                                                                                                                                                                                                                                                                                |
| 21<br>Ended<br>Oversight +<br>managerial +<br>responsive   | Had a PPI co-applicant.<br>“User and consumer groups have discussed the application and suggested changes to protocol which we have accepted. In the trial the groups will be asked to help with development of info leaflets, consent forms, letters, questionnaire design. The groups were very keen that a user was a collaborator on grant application. The team includes [name], a consumer representative who is chair of [Consumer Research Group], works with the [condition] Association and the [Research Network].”                                                                                                                                                                                      | Y | Had PPI co-applicant. Plans expanded (in terms of recruitment, analysis, interpretation of results, dissemination). CI had expectations for and prior experience of PPI; challenges (“poaching” of contributors; stress about funding/paying contributors for their time if in receipt of benefits/pension; disagreement with funders regarding contributor’s activities). PPI contributor had prior experience of PPI; challenges (time; being in demand). |
| 27<br>Ongoing<br>Oversight +<br>managerial +<br>responsive | No PPI co-applicants.<br>“We will include two [condition] patients to act in an advisory capacity. They will be invited to attend all collaborator meetings and quarterly trial management meetings. We will disseminate project information and findings for patients and patient groups.”                                                                                                                                                                                                                                                                                                                                                                                                                         | Y | Has PPI membership on trial management, steering, and data monitoring groups. CI had expectations for and prior experience of PPI; challenges (finding contributors). 2 PPI contributors interviewed had no prior experience of PPI; challenges (some doctors don’t want to understand your point of view; jargon; they talk about things you have gone through as a patient in a dispassionate way).                                                       |
| 16<br>Ongoing<br>Oversight +<br>managerial                 | Had a PPI co-applicant.<br>“[Name] is Head of Policy and Research at [name of a national trust]. She has extensive experience of representing the views of the consumer in clinical research and at local and national policy levels. [She] will ensure that the perspective of the consumer remains central during all stages of the trial. Independent user representative(s) will be included on the TSC. The role of user representatives on the Data Monitoring Committee is more difficult because of the complex technical nature of the role of this committee. However, once a Chair of the Data Monitoring Committee has been appointed, we will discuss with the Chair their views about the composition | Y | Has PPI co-applicant. CI had expectations for and prior experience of PPI; challenges (finding the right people; consumer groups with a specific interest and so may be “partisan”). PPI contributor had prior experience of PPI; challenges (jargon; infrequent meetings ‘not much to build a relationship on’).                                                                                                                                           |

|                                                            |                                                                                                                                                                                                                                                                                                                                                                                                                                                                                                                                                                                                                                                                                                                                                   |     |                                                                                                                                                                                                                                                                                                                                                                                                                                                                                                   |
|------------------------------------------------------------|---------------------------------------------------------------------------------------------------------------------------------------------------------------------------------------------------------------------------------------------------------------------------------------------------------------------------------------------------------------------------------------------------------------------------------------------------------------------------------------------------------------------------------------------------------------------------------------------------------------------------------------------------------------------------------------------------------------------------------------------------|-----|---------------------------------------------------------------------------------------------------------------------------------------------------------------------------------------------------------------------------------------------------------------------------------------------------------------------------------------------------------------------------------------------------------------------------------------------------------------------------------------------------|
|                                                            | of this committee, and specifically the role of users. User groups at annual [User Group meeting] have commented on the proposal and several groups have agreed to help develop the information and consent process.”                                                                                                                                                                                                                                                                                                                                                                                                                                                                                                                             |     |                                                                                                                                                                                                                                                                                                                                                                                                                                                                                                   |
| 5<br>Ongoing<br>Oversight +<br>managerial                  | Had a PPI co-applicant.<br>“We have identified consumer representation from participants in our previous studies, and one, who is a grant applicant, has contributed to the development of the application, trial design and study documentation, particularly the information to be provided about the safety and efficacy of [device]. We have identified a consumer representative to ensure that patients' views are incorporated into the design from the start. She is a grant applicant and has already contributed to the trial design and the participant information sheet. Consumer groups will ensure all relevant issues are covered, that patient information and survey instruments are acceptable and outcome measures relevant.” | Y   | Has PPI co-applicant. CI had no expectations for but had prior experience of PPI; challenges (finding the right people; finding people without an “axe to grind”). 2 PPI contributors interviewed had no prior experience of PPI; challenges (jargon, not liking flying).                                                                                                                                                                                                                         |
| 10<br>Ongoing<br>Oversight +<br>managerial +<br>responsive | Had PPI co-investigator.<br>No documented plans.                                                                                                                                                                                                                                                                                                                                                                                                                                                                                                                                                                                                                                                                                                  | n/a | Has co-investigator (from local authority). Consulted with parents regarding timing of intervention. Has a contributor on TSC. When getting low response, approached [education professionals] for advice. CI had expectations for PPI; said had no formal PPI experience “only informal”; challenges (sometimes difficult to get in touch with co-investigator contributor due to other commitments). PPI contributor had prior experience of PPI; challenges (concern about “being too picky”). |
| 4<br>Ended<br>Managerial                                   | No PPI co-applicants.<br>“A project management steering group [...] will include all co-applicants, research assistants and user representatives. User representatives will be involved in the development, implementation and interpretation of the study. This involvement will include: advice on recruiting patients, invitation letters, the design of information leaflets, and research instruments, piloting assessments, helping to assess progress, and contributing to the evaluation of the project, the interpretation of findings and the dissemination of results. User representatives will be invited to project steering group meetings and                                                                                     | Y   | Had 2 PPI members on the trial management group. Involved in most activities as envisaged and while unclear from CI interview about plans for interpretation of the study, responses to the CI survey indicate that analysis had not yet started. CI had expectations for and prior experience of PPI; no challenges. No PPI contributor interview.                                                                                                                                               |

|                                                            |                                                                                                                                                                                                                                                                                                                                                                                                                                                                                                                                                                                                                                                                                                                                                                                                                                                                                                                                                                                                                                                                                                                                                                                             |   |                                                                                                                                                                                                                                                                                                                                                                                                                                                           |
|------------------------------------------------------------|---------------------------------------------------------------------------------------------------------------------------------------------------------------------------------------------------------------------------------------------------------------------------------------------------------------------------------------------------------------------------------------------------------------------------------------------------------------------------------------------------------------------------------------------------------------------------------------------------------------------------------------------------------------------------------------------------------------------------------------------------------------------------------------------------------------------------------------------------------------------------------------------------------------------------------------------------------------------------------------------------------------------------------------------------------------------------------------------------------------------------------------------------------------------------------------------|---|-----------------------------------------------------------------------------------------------------------------------------------------------------------------------------------------------------------------------------------------------------------------------------------------------------------------------------------------------------------------------------------------------------------------------------------------------------------|
|                                                            | also provide assistance in each centre.”                                                                                                                                                                                                                                                                                                                                                                                                                                                                                                                                                                                                                                                                                                                                                                                                                                                                                                                                                                                                                                                                                                                                                    |   |                                                                                                                                                                                                                                                                                                                                                                                                                                                           |
| 7<br>Ongoing<br>Oversight +<br>managerial +<br>responsive  | Had a PPI co-applicant.<br>“We will include patients and carers as active participants in the research at all stages. [Name] and [name] have taken the role of patient representatives during the preparation of this research proposal. As the relevant service users are highly likely to be frail, we will use innovative methods to allow full involvement. We will not expect attendance at full research team meetings by patients or carers, although our patient representatives may bring their views to the team meetings, following meetings with individual or groups of service users in other forums. We identified service users to be involved in this trial through the [names of 2 organisations]. Our named co-applicant will attend Trial Management Group meetings throughout the study in order to contribute the service user perspective at all stages. In addition, [name] is a named co-applicant to the study and will play a role in ensuring that a patient focus is maintained throughout the study. We also plan to seek further views through a wider stakeholder group that will feed into the Trial Management Group through a nominated representative.” | Y | Has PPI co-applicant and membership on trial management, steering and data monitoring groups. Also consult separate panel of service users for specific issues. CI had expectations for and prior experience of PPI; challenges (identifying/engaging the right people; some less able to articulate their views; some wanting to do something impossible; difficulty getting other staff to understand or prioritise PPI). No PPI contributor interview. |
| 14<br>Ongoing<br>Managerial                                | Had a PPI co-applicant.<br>“Co-applicant with an academic interest in representing patients' perspectives in the design and conduct of health care research will advise the research team on the development of processes and materials which take into account patient concerns”.                                                                                                                                                                                                                                                                                                                                                                                                                                                                                                                                                                                                                                                                                                                                                                                                                                                                                                          | Y | Has PPI co-applicant but CI felt it was a “tick box” exercise. CI had no expectations for or prior experience of PPI; challenges (meetings attendance; lack of engagement). No PPI contributor interview.                                                                                                                                                                                                                                                 |
| 41<br>Ongoing<br>Oversight +<br>managerial +<br>responsive | Had a PPI co-applicant.<br>“A representative from [charity] has been involved in preparatory work and will be nominated as a member of the TSC. A minimum of two users will be invited to be part of the project team. A virtual user advisory group will be developed to provide further user support as appropriate. User involvement will contribute to: TSC and project management decisions on all stages of the project; project approval; refinement of self-assessment tools and advice package, exercise intervention; training events for health professionals; interpretation of findings; evaluation of user involvement; dissemination.”                                                                                                                                                                                                                                                                                                                                                                                                                                                                                                                                       | Y | Has PPI co-applicant. Trial has 2 PPI contributors although CI feels no strong PPI input overall. Unclear whether CI had expectations for PPI; had no prior experience of PPI; challenges (contributors with an “axe to grind”; contributors’ lack confidence about contributing at meetings). No PPI contributor interview.                                                                                                                              |
| 55                                                         | Had a PPI co-applicant.                                                                                                                                                                                                                                                                                                                                                                                                                                                                                                                                                                                                                                                                                                                                                                                                                                                                                                                                                                                                                                                                                                                                                                     | Y | Had PPI co-applicant. Planned to involve consumer                                                                                                                                                                                                                                                                                                                                                                                                         |

|                                                                                     |                                                            |                                                                                                                                                                                                                                                                                                                                                                                                                                                                                                                                                                                                                                                                                        |   |                                                                                                                                                                                                                                                                                                                                                                                                                                                                                                                                                                                                 |
|-------------------------------------------------------------------------------------|------------------------------------------------------------|----------------------------------------------------------------------------------------------------------------------------------------------------------------------------------------------------------------------------------------------------------------------------------------------------------------------------------------------------------------------------------------------------------------------------------------------------------------------------------------------------------------------------------------------------------------------------------------------------------------------------------------------------------------------------------------|---|-------------------------------------------------------------------------------------------------------------------------------------------------------------------------------------------------------------------------------------------------------------------------------------------------------------------------------------------------------------------------------------------------------------------------------------------------------------------------------------------------------------------------------------------------------------------------------------------------|
| 1<br>2<br>3<br>4<br>5<br>6<br>7<br>8<br>9<br>10<br>11<br>12<br>13<br>14<br>15<br>16 | Ended Oversight + managerial                               | “Patient reps have been very much involved in the preparation of this bid since its inception. The lead service user joined the TSG, will co-ordinate involvement of service users in the consumer panel and report their views to the TSG. Members of the consumer panel have commented on the current proposal and will be asked to comment on specific design and / or management issues during the course of the study. In particular, their views have been, and will continue to be sought during the preparation of patient information leaflets and posters, and in the preparation of study newsletters. They will be asked to help with dissemination of research findings.” |   | panel in dissemination of the findings. This did not happen but PPI ‘evolved’ because the team disseminated through other partners i.e. other patients they were “working with in the field” by that time. Other plans were adhered to. CI had expectations for and prior experience of PPI; challenges (not realising how much training the panel might need; not being clear about expectations of the main contributor; panel feeling ostracised; difficulty getting trial manager to understand importance and use of the patient panel in the early stages). No PPI contributor interview. |
| 17<br>18<br>19<br>20<br>21<br>22<br>23<br>24                                        | 15 Ended Oversight + managerial                            | Had a PPI co-applicant.<br>“[Name], a former patient and lay member of the advisory panel, has been fully involved in the application process as a co-applicant and will be a full, active and vocal member. The trial will be guided by a group of respected and experienced critical care personnel and trialists as well as a ‘lay’ representative.”                                                                                                                                                                                                                                                                                                                                | Y | No CI interview. PPI co-applicant helped to prepare paperwork for funding; also member of TSC. PPI contributor had prior experience of PPI; challenges (jargon).                                                                                                                                                                                                                                                                                                                                                                                                                                |
| 25<br>26<br>27<br>28<br>29<br>30<br>31                                              | 34+ Ended Managerial                                       | Had a PPI co-applicant.<br>“This proposal has been reviewed by our patient service user group and any opinions and comments incorporated. A patient representative will attend TSC meetings and be directly involved in decision making of trial processes and then relay back information to the [user groups] on a regular basis. Our Service Users group will be involved in all aspects of project design, data collection, analysis and dissemination.”                                                                                                                                                                                                                           | U | No CI interview. Had PPI co-applicant who appears to have been involved as intended, but it is not clear whether plans to involve the user group in data collection, analysis and dissemination were implemented. PPI contributor had prior experience of PPI; challenges (not being involved from the start).                                                                                                                                                                                                                                                                                  |
| 32<br>33<br>34<br>35                                                                | 18+ Ongoing Managerial                                     | Unclear whether had PPI co-applicants.<br>Same plans as trial 34 above†                                                                                                                                                                                                                                                                                                                                                                                                                                                                                                                                                                                                                | U | As above except unclear whether the informant was a co-applicant on this particular trial.                                                                                                                                                                                                                                                                                                                                                                                                                                                                                                      |
| 36<br>37                                                                            | <b>c) Trials which included a responsive role (n=14) †</b> |                                                                                                                                                                                                                                                                                                                                                                                                                                                                                                                                                                                                                                                                                        |   |                                                                                                                                                                                                                                                                                                                                                                                                                                                                                                                                                                                                 |
| 38<br>39<br>40<br>41<br>42<br>43<br>44<br>45<br>46<br>47<br>48<br>49                | 20 Ended                                                   | Had a PPI co-applicant.<br>“The research team will convene a steering group of research and service                                                                                                                                                                                                                                                                                                                                                                                                                                                                                                                                                                                    | Y | Had input from four PPI contributors at different times. Membership on TSC. Sought additional input                                                                                                                                                                                                                                                                                                                                                                                                                                                                                             |

|                                                                                     |                                                    |                                                                                                                                                                                                                                                                                                                                                                                                                                                                                                                                                                                                                                                                                                                                                                                                                                                                                                 |   |                                                                                                                                                                                                                                                                                                                                                                                                                                                                  |
|-------------------------------------------------------------------------------------|----------------------------------------------------|-------------------------------------------------------------------------------------------------------------------------------------------------------------------------------------------------------------------------------------------------------------------------------------------------------------------------------------------------------------------------------------------------------------------------------------------------------------------------------------------------------------------------------------------------------------------------------------------------------------------------------------------------------------------------------------------------------------------------------------------------------------------------------------------------------------------------------------------------------------------------------------------------|---|------------------------------------------------------------------------------------------------------------------------------------------------------------------------------------------------------------------------------------------------------------------------------------------------------------------------------------------------------------------------------------------------------------------------------------------------------------------|
| 1<br>2<br>3<br>4<br>5<br>6<br>7<br>8<br>9<br>10<br>11<br>12<br>13<br>14<br>15<br>16 | Managerial + responsive                            | users. This will meet three times during the study and will provide an opportunity for the research team to consult about research design and methods for data collection, choice of outcomes and methods for data analyses. The TSC will have an important role in interpreting initial findings and developing dissemination strategies. Consultation with young people and parents will be carried out in intervention and comparison clinics using focus groups. The views gathered in these groups will inform the development of research procedures (e.g. consent, outcome measures), tools for data collection and the process evaluation. Focus groups will also provide opportunity for young people to contribute to interpretation of study findings. Further consultation with young people will involve piloting all research tools to ensure acceptability and appropriateness." |   | when struggling with particular issues. CI had expectations for and prior experience of PPI; challenges (having a contributor who was a patient of the lead PI - "conflict of roles"; frustration at inability to integrate contributors' ideas regarding questionnaire which was a validated instrument and therefore could not be altered.) PPI contributor had no prior experience except as charity member; no challenges.                                   |
| 17<br>18<br>19<br>20<br>21<br>22<br>23<br>24<br>25<br>26<br>27                      | 101<br>Ended<br>Oversight + responsive             | No PPI co-applicants.<br>"We will convene user group meetings in each locality during the pilot study, we will organise separate focus groups to explore expectations of treatment. We have a commitment from panels of users/experts including representatives from relevant charities to meet annually during the study to advise on its conduct. We will have lay representation on the TSC."                                                                                                                                                                                                                                                                                                                                                                                                                                                                                                | Y | Had PPI membership on TSC and consulted with wider groups as planned. CI felt PPI was under utilised and said "people above me in the scheme of things may see it as a tick box exercise". CI had no expectations for PPI; unclear regarding prior experience of PPI; challenges (finding suitable people, "pinning people down", some may find it daunting whereas "professional PPI reps" do not). PPI contributor had prior experience of PPI; no challenges. |
| 28<br>29<br>30<br>31<br>32<br>33<br>34<br>35<br>36<br>37                            | 21<br>Ended<br>Oversight + managerial + responsive | Had a PPI co-applicant.<br>"User and consumer groups have discussed the application and suggested changes to protocol which we have accepted. In the trial the groups will be asked to help with development of info leaflets, consent forms, letters, questionnaire design. The groups were very keen that a user was a collaborator on grant application. The team includes [name], a consumer representative who is chair of [Consumer Research Group], works with the [condition] Association and the [Research Network]."                                                                                                                                                                                                                                                                                                                                                                  | Y | Plans expanded (in terms of recruitment, analysis, interpretation of results, dissemination). CI had expectations for and prior experience of PPI; challenges ("poaching" of contributors; stress about funding/paying contributors for their time if in receipt of benefits/pension; disagreement with funders regarding contributor's activities). PPI contributor had prior experience of PPI; challenges (time; being in demand).                            |
| 38<br>39<br>40<br>41<br>42<br>43<br>44<br>45<br>46<br>47<br>48<br>49                | 27<br>Ongoing                                      | No PPI co-applicants.<br>"We will include two [condition] patients to act in an advisory capacity. They                                                                                                                                                                                                                                                                                                                                                                                                                                                                                                                                                                                                                                                                                                                                                                                         | Y | Has PPI membership on trial management, steering, and data monitoring groups. CI had expectations for                                                                                                                                                                                                                                                                                                                                                            |

1  
2  
3  
4  
5  
6  
7  
8  
9  
10  
11  
12  
13  
14  
15  
16  
17  
18  
19  
20  
21  
22  
23  
24  
25  
26  
27  
28  
29  
30  
31  
32  
33  
34  
35  
36  
37  
38  
39  
40  
41  
42  
43  
44  
45  
46  
47  
48  
49

|                                                      |                                                                                                                                                                                                                                                                                                                                                                                                                                                                                                                        |     |                                                                                                                                                                                                                                                                                                                                                                                                                                |
|------------------------------------------------------|------------------------------------------------------------------------------------------------------------------------------------------------------------------------------------------------------------------------------------------------------------------------------------------------------------------------------------------------------------------------------------------------------------------------------------------------------------------------------------------------------------------------|-----|--------------------------------------------------------------------------------------------------------------------------------------------------------------------------------------------------------------------------------------------------------------------------------------------------------------------------------------------------------------------------------------------------------------------------------|
| Oversight + managerial + responsive                  | will be invited to attend all collaborator meetings and quarterly trial management meetings. We will disseminate project information and findings for patients and patient groups.”                                                                                                                                                                                                                                                                                                                                    |     | and prior experience of PPI; challenges (finding contributors). 2 PPI contributors interviewed had no prior experience of PPI; challenges (some doctors don’t want to understand your point of view; jargon; they talk about things you have gone through as a patient in a dispassionate way).                                                                                                                                |
| 10<br>Ongoing<br>Oversight + managerial + responsive | Had PPI ‘co-investigator’.<br>No documented plans.                                                                                                                                                                                                                                                                                                                                                                                                                                                                     | n/a | Consulted with parents regarding timing of intervention. Has a contributor on TSC. When getting low response, approached [education professionals] for advice. CI had expectations for PPI; said had no formal PPI experience “only informal”; challenges (sometimes difficult to get in touch with co-investigator contributor due to other commitments). PPI contributor’s challenges: concern about ‘being too pernickety’. |
| 9<br>Ended<br>Oversight + responsive                 | Unclear whether there were PPI co-applicants.<br>“The TSC will include a patient representative, [name], who has acted in this capacity in several other large-scale trials and is aware of issues that might be raised from the lay perspective. The patient information leaflet and consent form have been reviewed by potential service users, and their comments taken into account in finalising these documents prior to submission for ethics approval.”                                                        | Y   | Unclear whether CI had expectations for or prior experience of PPI; no challenges. No PPI contributor interview.                                                                                                                                                                                                                                                                                                               |
| 102<br>Ended<br>Oversight + responsive               | No PPI co-applicants.<br>“At the outline proposal stage, this trial was submitted to the [name of funding body] who sought the opinion of the [condition] Society. The [condition] Society unequivocally confirmed their support of the proposed trial. The [condition] Society have also confirmed their willingness to represent their members through steering committee membership of the [name of trial] and to help the trialists in the construction of the MREC application and patient information leaflets.” | Y   | Seems to have expanded plans (in terms of dissemination, i.e. press releases and findings for participants). CI had expectations for and prior experience of PPI; no challenges. No PPI contributor interview.                                                                                                                                                                                                                 |
| 6<br>Ongoing                                         | No PPI co-applicants.<br>“The TSC will include an already identified patient. He will provide an                                                                                                                                                                                                                                                                                                                                                                                                                       | Y   | CI had expectations for but unclear whether had prior experience of PPI; no challenges. No PPI                                                                                                                                                                                                                                                                                                                                 |

|                                                      |                                                                                                                                                                                                                                                                                                                                                                                                                                                                                                                                                                                                                                                                                                                                                                                                                                                                                                                                                                                                                                                                                                                                                                                             |     |                                                                                                                                                                                                                                                                                                                                                          |
|------------------------------------------------------|---------------------------------------------------------------------------------------------------------------------------------------------------------------------------------------------------------------------------------------------------------------------------------------------------------------------------------------------------------------------------------------------------------------------------------------------------------------------------------------------------------------------------------------------------------------------------------------------------------------------------------------------------------------------------------------------------------------------------------------------------------------------------------------------------------------------------------------------------------------------------------------------------------------------------------------------------------------------------------------------------------------------------------------------------------------------------------------------------------------------------------------------------------------------------------------------|-----|----------------------------------------------------------------------------------------------------------------------------------------------------------------------------------------------------------------------------------------------------------------------------------------------------------------------------------------------------------|
| Oversight + responsive                               | informed patient perspective. He is willing to assist us in the trial, and will be listed as a member of the TSC. We will also work with [charity] to involve service users. This will be done through our links with the [unit], which is co-directed by one of our applicants, [name]. We will begin this process during the protocol set-up period.”                                                                                                                                                                                                                                                                                                                                                                                                                                                                                                                                                                                                                                                                                                                                                                                                                                     |     | contributor interview.                                                                                                                                                                                                                                                                                                                                   |
| 7<br>Ongoing<br>Oversight + managerial + responsive  | Had a PPI co-applicant.<br>“We will include patients and carers as active participants in the research at all stages. [Name] and [name] have taken the role of patient representatives during the preparation of this research proposal. As the relevant service users are highly likely to be frail, we will use innovative methods to allow full involvement. We will not expect attendance at full research team meetings by patients or carers, although our patient representatives may bring their views to the team meetings, following meetings with individual or groups of service users in other forums. We identified service users to be involved in this trial through the [names of 2 organisations]. Our named co-applicant will attend Trial Management Group meetings throughout the study in order to contribute the service user perspective at all stages. In addition, [name] is a named co-applicant to the study and will play a role in ensuring that a patient focus is maintained throughout the study. We also plan to seek further views through a wider stakeholder group that will feed into the Trial Management Group through a nominated representative.” | Y   | Consulted separate panel of service users for specific issues. CI had expectations for and prior experience of PPI; challenges (identifying/engaging the right people; some less able to articulate their views; some wanting to do something impossible; difficulty getting other staff to understand or prioritise PPI). No PPI contributor interview. |
| 41<br>Ongoing<br>Oversight + managerial + responsive | Had a PPI co-applicant.<br>“A representative from [charity] has been involved in preparatory work and will be nominated as a member of the TSC. A minimum of two users will be invited to be part of the project team. A virtual user advisory group will be developed to provide further user support as appropriate. User involvement will contribute to: TSC and project management decisions on all stages of the project; project approval; refinement of self-assessment tools and advice package, exercise intervention; training events for health professionals; interpretation of findings; evaluation of user involvement; dissemination.”                                                                                                                                                                                                                                                                                                                                                                                                                                                                                                                                       | Y   | Has PPI co-applicant. Trial has 2 PPI contributors although CI feels no strong PPI input overall. Unclear whether CI had expectations for PPI; had no prior experience of PPI; challenges (contributors with an “axe to grind”; contributors’ lack confidence about contributing at meetings). No PPI contributor interview.                             |
| 79<br>Ended<br>Oversight +                           | No PPI co-applicants.<br>No documented plans.                                                                                                                                                                                                                                                                                                                                                                                                                                                                                                                                                                                                                                                                                                                                                                                                                                                                                                                                                                                                                                                                                                                                               | n/a | Although no documented plans the CI wanted PPI to sit on TSC and comment on patient info leaflets. The CI felt that PPI started early. There were 2 types of                                                                                                                                                                                             |

|                                            |                                                                                                                                                                                                                                                                                                                                                                                                                                                                                                                                                                                                                                                                                                                                                                                                           |   |                                                                                                                                                                                                                                                                                                                                                                                                                                                                                                                                                      |
|--------------------------------------------|-----------------------------------------------------------------------------------------------------------------------------------------------------------------------------------------------------------------------------------------------------------------------------------------------------------------------------------------------------------------------------------------------------------------------------------------------------------------------------------------------------------------------------------------------------------------------------------------------------------------------------------------------------------------------------------------------------------------------------------------------------------------------------------------------------------|---|------------------------------------------------------------------------------------------------------------------------------------------------------------------------------------------------------------------------------------------------------------------------------------------------------------------------------------------------------------------------------------------------------------------------------------------------------------------------------------------------------------------------------------------------------|
| responsive                                 |                                                                                                                                                                                                                                                                                                                                                                                                                                                                                                                                                                                                                                                                                                                                                                                                           |   | involvement: 2 contributors on the TSC; and then obtained views on information sheets from relevant groups. CI had no previous experience of PPI; no challenges. No PPI contributor interview.                                                                                                                                                                                                                                                                                                                                                       |
| 76<br>Ongoing<br>Oversight +<br>responsive | No PPI co-applicants.<br>“The [organisation] has recently established a Research Advisory Group. This Group, which includes key stakeholders with an interest in the research carried out by [organisation] (patients, charities representing patients’ interests, general practitioners, NHS commissioners, research funding organisations and a regional [medical] network), has been set up to ensure that the clinical research carried out in [organisation] is ethical, important, relevant, appropriately designed to meet the needs of patients and the NHS. We anticipate the Group would have the opportunity to influence important details of the project before recruitment starts. A patient representative (we propose a member of the [advisory group]) will be invited to join the TSC.” | U | Has PPI membership on TSC as planned; unclear whether plans to seek advice of new advisory group prior to recruitment were implemented (although did approach a group of patients from a previous trial about format/comprehensibility of questionnaire). CI talked of a “tick box exercise” but also ensuring participants’ perspective; “overseeing the trial – a ‘safeguard’ rather than improving research”. CI had expectations for but no prior experience of PPI; challenges (communication and understanding). No PPI contributor interview. |
| 106<br>Ended<br>Oversight +<br>responsive  | No PPI co-applicants.<br>“We have consulted widely, including with patients to seek their views on trial design and relevant outcome measures. We have involved service users in the design of the trial. We used the patient information pack and part of the questionnaire that has been developed and validated in collaborative research with the [institute] as a basis for in-depth interviews to identify patient perspectives on trial design and outcomes. We have identified one service user, [name], who will advise the trial management committee on patient perspectives.”                                                                                                                                                                                                                 | Y | No CI interview. PPI contributor had prior experience of PPI but felt she had made no difference to the trial; no challenges.                                                                                                                                                                                                                                                                                                                                                                                                                        |
| 91<br>Ongoing<br>Oversight +<br>responsive | No PPI co-applicants.<br>“We have involved [name] who is a non-executive patient representative member of [hospital trust] and who has co-ordinated consumers’ input into the scientific quality, feasibility and practicality of the proposal. She will continue to participate in the protocol design of the study and be a member of the TSC.”                                                                                                                                                                                                                                                                                                                                                                                                                                                         | Y | No CI interview. Plans expanded (in terms of the PPI contributor obtaining feedback from “women’s groups”). PPI contributor had prior experience of PPI; challenges (just being confident enough to make your point).                                                                                                                                                                                                                                                                                                                                |

\* As described in the funding application and/or study protocol; includes justification of costs where data were available



1  
2  
3  
4  
5  
6  
7  
8  
9  
10  
11  
12  
13  
14  
15  
16  
17  
18  
19  
20  
21  
22  
23  
24  
25  
26  
27  
28  
29  
30  
31  
32  
33  
34  
35  
36  
37  
38  
39  
40  
41  
42  
43  
44  
45  
46  
47  
48  
49

\*\*As reported during informant interviews - any reference to tokenism; whether CI had prior experience of or personal expectations for PPI; whether CI mentioned challenges; whether PPI contributor mentioned challenges  
† PPI contributor was discussing 2 trials [id 18 and 34] during the interview  
‡ Many trials utilised more than one form of PPI  
TSC=trial steering committee

For peer review only

**Table 2 Summary of challenges met by CIs and contributors to PPI in clinical trials**

| CI interviews (n=21)                                                                        | PPI contributor interviews (n=17)*                        |
|---------------------------------------------------------------------------------------------|-----------------------------------------------------------|
| <u>Challenges common to researchers and PPI contributors:</u>                               |                                                           |
| Failure to engage contributors fully or early                                               | Not being involved from the start;<br>Infrequent meetings |
| Contributors overawed/lacking confidence                                                    | Feeling unqualified or overwhelmed                        |
| Failing to clarify to contributors what was expected of them                                | Role expectations (being unsure what was expected of you) |
| Worry about taking up contributor's time                                                    | Time constraints                                          |
| Contributors being 'poached'                                                                | Being in demand by other research teams                   |
| Meeting attendance by PPI contributors                                                      | Getting to meetings                                       |
| <u>Challenges unique to researchers or PPI contributors:</u>                                |                                                           |
| Finding the right people                                                                    | Jargon                                                    |
| Own patient as a PPI contributor (can lead to conflict between clinical and research roles) | Interactions within team and being listened to            |
| Communication difficulties due to age                                                       | Concern about appearing confrontational                   |
| Change of PPI personnel                                                                     | Concern about appearing too 'pernickety'                  |
| Getting other team members to understand/prioritise PPI                                     | Remembering 'what side you are on'                        |
| Underestimating training needs of contributors                                              |                                                           |
| Worry that contributors may lose payment if receiving state pension/benefits                |                                                           |
| Disagreement with funders about implementing contributors' suggestions                      |                                                           |

\* One PPI contributor was involved in and talked about 2 trials which were in this sample, and there were 2 trials for which we had 2 PPI contributor interviews each

1  
2  
3  
4  
5  
6  
7  
8  
9  
10  
11  
12  
13  
14  
15  
16  
17  
18  
19  
20  
21  
22  
23  
24  
25  
26  
27  
28  
29  
30  
31  
32  
33  
34  
35  
36  
37  
38  
39  
40  
41  
42  
43  
44  
45  
46  
47  
48  
49

For peer review only

Figure 1 EPIC trials eligible for analysis comparing PPI plans and implementation

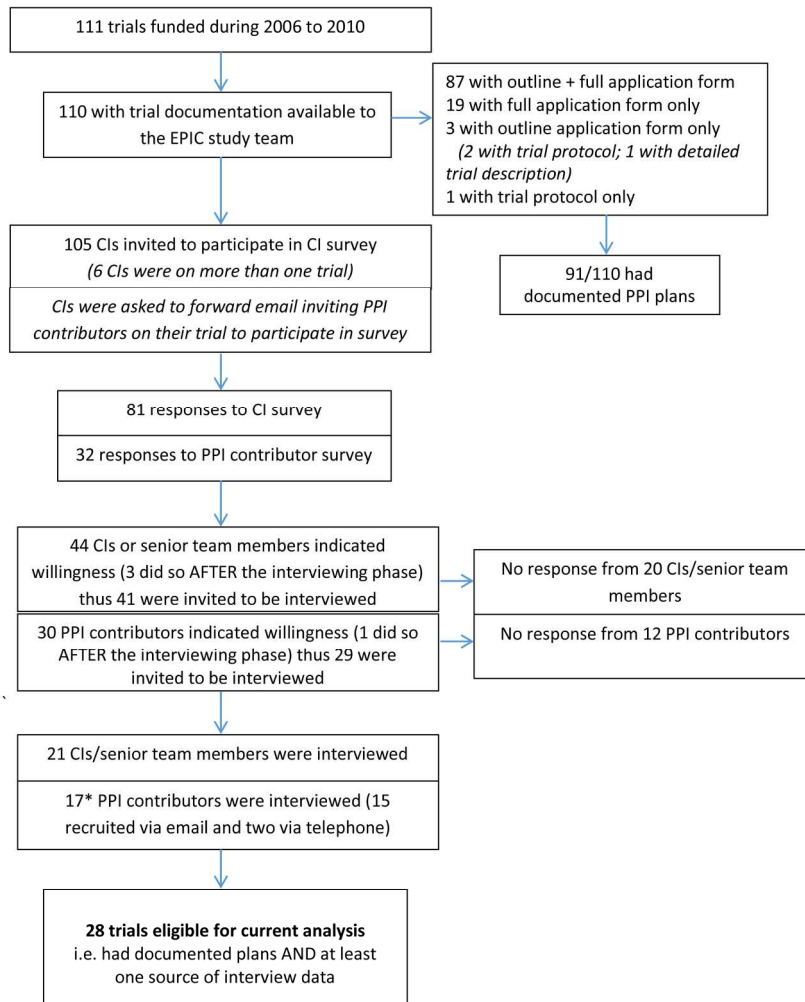

\*There were 17 contributor interviews for 17 trials, although one PPI contributor was in 2 trials while a further 2 trials had 2 PPI contributor interviews

234x315mm (300 x 300 DPI)

**From plans to actions in patient and public involvement: Qualitative study of documented plans  
and the accounts of researchers and patients sampled from a cohort of clinical trials**

Deborah Buck, Carrol Gamble, Louise Dudley, Jennifer Preston, The EPIC Patient Advisory Group, Bec Hanley, Paula R Williamson, Bridget Young

Deborah Buck, Research Associate  
Department of Biostatistics, University of Liverpool, 1<sup>st</sup> floor Duncan Building, Daulby Street,  
Liverpool, L69 3GA

Carrol Gamble, Professor of Medical Statistics  
Department of Biostatistics, University of Liverpool, 1<sup>st</sup> floor Duncan Building, Daulby Street,  
Liverpool, L69 3GA

Louise Dudley, Research Associate  
Department of Biostatistics, University of Liverpool, 1<sup>st</sup> floor Duncan Building, Daulby Street,  
Liverpool, L69 3GA

Jennifer Preston, Consumer Liaison Manager  
NIHR Clinical Research Network: Children, Coordinating Centre, University of Liverpool, Department  
of Women's and Children's Health, Institute of Translational Medicine (Child Health), Alder Hey  
Children's NHS Foundation Trust, Eaton Road, Liverpool, L12 2AP

The EPIC Patient Advisory Group (Alison Allam, Philip Bell, Neil Formstone, Heather Goodare, and  
Alison Walker), Department of Biostatistics, University of Liverpool, 1<sup>st</sup> floor Duncan Building, Daulby  
Street, Liverpool, L69 3GA

Ms Bec Hanley. Co-director of TwoCan Associates  
TwoCan Associates, 59 Wickham Hill, Hurstpierpoint, Hassocks, BN6 9NR

Paula R Williamson, Professor of Medical Statistics  
Department of Biostatistics, University of Liverpool, 1<sup>st</sup> floor Duncan Building, Daulby Street,  
Liverpool, L69 3GA

Bridget Young, Professor of Psychology  
Department of Psychological Sciences, University of Liverpool, Whelan Building, Liverpool, L69 3GB

**Corresponding author:**

Professor Bridget Young

Email: [byoung@liv.ac.uk](mailto:byoung@liv.ac.uk) Tel: 0151 794 5525

**Keywords:** consumer participation; public and patient involvement; clinical trials

**Word count:** 7989 excluding Abstract, tables, figure, box, and references

## Abstract

### Background

Patient and public involvement (PPI) in research is increasingly required, although evidence to inform its implementation is limited.

### Objective

Inform the evidence base by describing how plans for PPI were implemented within clinical trials and identifying the challenges and lessons learnt by research teams.

### Methods

We compared PPI plans extracted from clinical trial grant applications (funded by the National Institute for Health Research Health Technology Assessment Programme between 2006-2010) with researchers' and PPI contributors' interview accounts of PPI implementation. Thematic analysis of PPI plans and transcribed qualitative interviews drew on the Framework technique.

### Results

Of 28 trials, 25 documented plans for PPI in funding applications and half described implementing PPI before applying for funding. Plans varied from minimal to extensive, although almost all anticipated multiple modes of PPI. Interview accounts indicated that PPI plans had been fully implemented in 20/25 trials and even expanded in some. Nevertheless, some researchers described PPI within their trials as tokenistic. Researchers and contributors noted that late or minimal PPI engagement diminished its value. Both groups perceived uncertainty about roles in relation to PPI, and noted contributors' lack of confidence and difficulties attending meetings. PPI contributors experienced problems in interacting with researchers and understanding technical language. Researchers reported difficulties finding 'the right' PPI contributors, and advised caution when involving investigators' current patients.

### Conclusion

Engaging PPI contributors early and ensuring ongoing clarity about their activities, roles and goals, is crucial to PPI's success. Funders, reviewers, and regulators should recognise the value of pre-application PPI and allocate further resources to it. They should also consider whether PPI plans in grant applications match a trial's distinct needs. Monitoring and reporting PPI before, during, and after trials will help the research community to optimise PPI, although the need for ongoing flexibility in implementing PPI should also be recognised.

**Strengths and limitations of this study**

- This was the first study to examine whether plans for patient and public involvement (PPI), as documented in trialists' grant applications, were subsequently implemented.
- Semi-structured interviews with chief investigators and patients allowed us to identify challenges to implementing PPI, and lessons learnt, from a range of informant perspectives.
- The study benefited from the inclusion of a combination of trials which had ended at the time of the interviews, and those which were ongoing.
- Some informants struggled to recall events pertaining to PPI for trials which had ended - a drawback of retrospective study designs.
- We used a historical cohort of trials, funded four to eight years previously. The emphasis on PPI has grown over these years, thus our findings may not fully reflect the planning and implementation of PPI in trials funded more recently.

## Introduction

There are several schools of thought regarding why patient contributors should be involved as advisors or partners in health care research, rather than just as participants. Ethical and political arguments for patient partnerships are based upon values such as democracy, accountability and empowerment.[1-3] Alongside these values are pragmatic arguments which revolve around the belief that patient and public involvement (PPI) can enhance the relevance, validity, quality, and success of research.[1-5] The growth in PPI both nationally and internationally[6-8] is reflected by its increasing assimilation into grant applications, with funding bodies encouraging researchers to submit plans for PPI in order to obtain funding.[2, 9-12] Such developments have branched out into other realms including patient ~~involvement partnerships~~ in academic publishing, for instance within the BMJ.[13]

For PPI contributors, getting involved in research has been reported to lead to 'personal development' such as boosting confidence, empowerment and a sense of purpose.[14] Similarly there can be personal benefits for researchers who have reported that their attitudes, values and beliefs about the worth of PPI had been heightened as a result of such involvement.[15] However, ~~there are indications that 'patient influence' can pose a potential threat to the validity of research,~~ as well as being a vehicle for ~~improving~~promoting research validity, ~~there are indications that 'patient influence' can pose a potential threat to the validity of research if it is not drawn upon appropriately.~~[2] For example, ~~it has potential to lead to bias, while~~ PPI in technical decisions may result in worse as opposed to improved project outcomes.[16]

Challenges to the realisation of plans for PPI include debate regarding its purpose, lack of evidence regarding the impact of PPI, complexities in researchers and contributors sharing power, and difficulties in ensuring sufficient resources for PPI.[4, 10, 15, 17-19] Alongside such challenges are uncertainties regarding how best to plan PPI, ~~especially in the context of randomised controlled trials (RCTs)~~ Guidance about PPI in trials drawing on the opinions and experiences of those involved in PPI activity within trials is available[17, 20] ~~and a recent review has examined case studies of PPI in the design and conduct of trials.~~[21] However, the evidence base is limited in terms of the range of trials, researchers, and patients that have informed this previous work, and Evidence on how to implement PPI is particularly limited in this setting, and tthere has been no systematic evaluation of the extent to which trialists' intentions for PPI are put into practice. This is an important gap in view of the above challenges and the increased onus on researchers to build plans for PPI into their grant applications. Such plans run the risk of being uninformed due to the lack of evidence across a range



1  
2  
3 | [of trial contexts and informant perspectives](#). In this paper we aim to inform practice for trialists and  
4 contributors by describing the extent to which documented PPI plans were implemented within a  
5  
6 | [range sample](#) of clinical trials and identifying the challenges met and the lessons learnt. Given that  
7  
8 funding bodies encourage PPI, we also aim to inform policy with regard to post-trial scrutiny of PPI in  
9  
10 terms of processes, facilitators and barriers, and impacts.

## 11 12 13 **Methods**

### 14 15 **Terminology**

16 We use the term 'PPI contributors' or 'contributors' rather than the more commonly used term 'PPI  
17 representatives' to avoid implying that a few individuals can represent the perspectives of diverse  
18 patient groups and members of the public, and 'informants' to refer collectively to the researchers  
19 (primarily chief investigators (CIs)) and PPI contributors. We use the terms 'documented plans' to  
20 refer to the plans for PPI which were written into the funding application or study protocol and  
21 'expectations' to refer to what the trial team expected PPI to achieve, as described by the  
22  
23 researchers during the interviews.  
24  
25  
26  
27  
28

### 29 30 **Design**

31 This qualitative study formed part of the 'Evidence base for Patient and public Involvement in  
32 Clinical trials' (EPIC) project. EPIC aimed to investigate PPI in a cohort of RCTs funded by the National  
33 Institute for Health Research (NIHR) Health Technology Assessment (HTA) programme between 2006  
34 and 2010. We have described the methods in full elsewhere.[22] In summary, EPIC comprised four  
35 phases. Phase 1 examined trialists' plans for PPI as described within their outline and full funding  
36 applications. Phase 2 was a questionnaire survey of chief investigators' (CIs) and PPI contributors'  
37 opinions and activities concerning PPI. Phase 3 involved qualitative interviews with CIs, PPI  
38 contributors and trial managers (TMs). Phase 4 examined the role of clinical trials units in identifying  
39 and supporting PPI activity in trials.  
40  
41  
42  
43  
44  
45

46  
47 The current paper draws mostly on data from Phases 1 and 3 and, to a lesser extent, Phase 2. EPIC  
48 had a patient advisory group, consisting of five people with experience of being a patient or carer,  
49 previous PPI contribution in trials, and lay review of funding applications and membership of funding  
50 panels. The National Research Ethics Service (NRES) advised that EPIC did not require NRES ethics  
51 approval; we therefore sought and obtained a favourable ethical opinion from the University of  
52  
53 Liverpool Research Ethics Committee (Ref: RETH000489).  
54  
55  
56  
57  
58  
59  
60

### Sampling and recruitment for semi-structured interviews

We emailed CIs at the address given on their grant application form. We aimed for a diverse sample of CIs for interview, based on their responses to questions within the CI survey concerning motivations for including PPI and its perceived impact, although we ultimately invited all but three of the CIs who had responded to the survey and expressed an interest in being interviewed. Three CIs were not invited because of delays in responding to the survey. We identified and invited PPI contributors to be interviewed through the CIs, chairs of steering committees, and advertisements on PPI websites. Potential informants were sent an email with an information leaflet which included the purpose of the qualitative study.

LD conducted semi-structured telephone interviews with informants between April 2013 and November 2013, seeking their views and experiences of PPI within their trial. The interviewer had a BSc and MRes in psychology, and previous experience and training of conducting and analysing qualitative interviews. Apart from the recruitment emails, the interviewer had not established a relationship with the participants prior to study commencement. LD was new to the field of patient involvement in research and sought to maintain an open minded approach in exploring its implementation in trials. The interviews were audio-recorded, transcribed, anonymised and checked for accuracy. The interviewer used topic guides which were reviewed by our patient advisory group, and developed in light of ongoing data analysis. The interviews were conversational in nature, enabling informants to freely describe their experiences and raise topics which we had not anticipated. Informants gave their informed consent for the interviews to be audio-recorded and analysed. During the interviews we asked all informants to describe the type of PPI activity that had taken place in the trial. In order to foster rapport between informant and interviewer we intentionally avoided direct questions about why any plans were not implemented. However, we did ask CIs whether they would do anything differently regarding PPI if they were to start the trial again. We asked PPI contributors about any challenges and explored their views on how PPI could be enhanced in future trials. No field notes or repeat interviews were undertaken.

### Data sources

Primary sources of data were: trial documentation (full application forms, reviewer comments, detailed project descriptions and study protocols), from which we extracted data about plans for PPI; and CI and PPI contributor interview transcripts, from which we determined whether the documented plans were implemented. Secondary sources of data were: outline application forms; CI survey responses; and TM interview transcripts. We used the secondary sources in cases of

1  
2  
3 ambiguity, i.e. where it was unclear from the primary sources whether aspects of a particular set of  
4 plans had been implemented. We also used the secondary sources to elucidate the illustrative  
5 examples that we present in the results below.  
6  
7

### 8 9 **Analysis**

10 To be eligible for the current analysis at least one source of interview data was required from either  
11 the CI or PPI contributor, as well as the grant application documents from which we identified and  
12 extracted data regarding plans for PPI. To determine the extent to which these documented plans  
13 were implemented we focused equally on the qualitative data from the CI and PPI contributor  
14 interview transcripts. In cases of ambiguity we consulted the TM interview transcripts, where  
15 available. We ~~used thematic analysis, focused on a method for~~ identifying ~~and~~, analysing, ~~and~~  
16 ~~reporting patterns~~ patterns (themes) within the data, to inform our interpretations,[23] and as  
17 appropriate the criterion of catalytic validity, whereby qualitative research should not just describe  
18 but aim to inform practice. [24] For the purposes of determining the PPI activity undertaken,  
19 challenges met and lessons learnt, one author (DB) first familiarised herself with the data by reading  
20 the transcripts several times, before drawing on the Framework technique[25] to develop and apply  
21 open codes to the interview data. She then grouped the codes into broader categories within the  
22 framework and compared these with data extracted from the documented plans. Other members of  
23 the EPIC team who were familiar with the interview transcripts and documented plans examined the  
24 early stages and ongoing refinements of the descriptive coding framework, as well as the tabulated  
25 comparisons of planned and implemented PPI. CG had analysed the CI survey and application  
26 forms,[22] and LD and BY had analysed the interview data to explore the perceived impact of PPI  
27 (Dudley et al 2014(a); under review; revision invited), thus providing confidence in the credibility and  
28 'confirmability' of the present findings.[26] Moreover, DB analysed the interview transcripts before  
29 looking at the documented plans that had been extracted from the grant application forms, thus  
30 helping to reduce the chances that the documented plans would unduly influence her  
31 interpretations of informants' interview accounts of PPI. Transcripts were not returned to  
32 informants for 'member checking' as interpretation of such ~~were not asked to provide~~ is  
33 problematic on the findings. [27] A description of the coding frame is available upon request.  
34  
35  
36  
37  
38  
39  
40  
41  
42  
43  
44  
45  
46  
47  
48  
49

50  
51 We provide illustrative quotes from a range of interviews and trial documents. Identification codes  
52 signify the source of informant quotes based on their group (i.e. CI or PPI contributor) followed by  
53 their anonymised trial identification number. Where more than one PPI contributor was interviewed  
54 for the same trial, we indicate as PPI 1 or PPI 2. Codes for documented plans refer to anonymised  
55  
56  
57  
58  
59  
60

1  
2  
3 trial identification numbers. We replaced identifying text within quotes with anonymised text, and  
4 use [...] to signify abridged quotes.  
5  
6

7  
8 In the sections that follow we refer to the three different types of PPI role, identified by our earlier  
9 analysis of informants' accounts of the impact of PPI on the trials ([reported separately Dudley et al](#)  
10 [2014\(a\); under review; revision invited](#)). The identified PPI roles were: oversight, typically  
11 characterised by the formal presence of a PPI contributor on the trial steering committee ([TSC](#)), with  
12 infrequent involvement; managerial, also usually a formal role but with more regular involvement,  
13 for example as co-investigator or member of the trial management group; and responsive roles,  
14 which tended to be less formal, often with more than one contributor, or making use of advisory  
15 panels and focus groups as and when problems occurred.  
16  
17  
18  
19  
20  
21  
22  
23

## 24 Results

### 25 PPI Plans: From intentions to actions

26  
27 As illustrated in Figure 1, 28 trials were eligible for inclusion in the current analysis. We conducted  
28 interviews with both the CI and a PPI contributor in nine of the 28 trials, with the CI only in 12 trials,  
29 and with a PPI contributor only in seven trials. One PPI contributor was involved in two of the trials  
30 in this sample, while a further two trials had two PPI contributor interviews. We also conducted  
31 interviews with 10 TMs and consulted one of these transcripts where there was ambiguity in CI / PPI  
32 accounts regarding whether all plans for PPI had been implemented. Interviews lasted 45 minutes  
33 on average. [Where multiple sources of interview data were available, e.g. from a CI and a PPI](#)  
34 [contributor, there were no major discrepancies between accounts.](#)  
35  
36  
37  
38  
39  
40  
41

42 As shown in Table 1, all but three of the 28 trials had documented plans for PPI in their grant  
43 application or protocol or both. These documents varied greatly regarding the extensiveness of PPI  
44 activity planned and precision with which plans were described, from vague references to activities  
45 that hinted at PPI, "We will make use of two primary care research networks and an [intervention-  
46 specific] research network" (Trial 115), to statements that were quite precise, "The [Society]  
47 confirmed their willingness to represent their members through steering committee membership  
48 [...] and to help in the construction of the MREC application and patient information leaflets" (Trial  
49 102). Based on informants' interview accounts, all trials subsequently incorporated some form of PPI  
50 and it was clear from the interviews that documented plans were fully implemented in most (20/25)  
51 instances regardless of whether the plans were vague or precise, minimal, or extensive. The three  
52  
53  
54  
55  
56  
57  
58  
59  
60

1  
2  
3 trials without documented plans did proceed to include some PPI activity, perhaps prompted, to an  
4 extent, by comments from peer reviewers who had remarked on the lack of PPI plans in each case.  
5  
6 This is particularly likely in Trial 2. Here, the grant application referred to pre-funding PPI and when  
7 interviewed the CI spoke of initial “tokenism” and “ignorance” about how PPI should work. A further  
8 three trials expanded on documented plans, giving a total of six trials which had seen addition or  
9 expansion of plans for PPI.  
10  
11

12  
13  
14 Despite informants indicating that most of the documented plans for PPI had been implemented,  
15 some revealed no personal expectations for PPI and spoke of using it as a means of “ticking the right  
16 boxes”. This raises questions about the motivations behind the PPI plans in some grant applications.  
17  
18 As noted, we had previously identified three types of PPI roles within our cohort of RCTs: oversight,  
19 managerial, and responsive,[22] and many trials built into their plans a combination of these roles.  
20  
21 Based on informants’ accounts it appeared that six trials largely confined PPI to an oversight mode of  
22 involvement, although some had hinted at other modes in their applications. We begin by examining  
23 what happened in these trials.  
24  
25  
26  
27

### 28 29 **Oversight mode trials (n=6)**

30 Oversight mode trials were those which confined PPI input to membership of ~~trial steering~~  
31 ~~committees (TSCs)~~. Based on informant interview accounts, there were six trials that constrained PPI  
32 to this mode of involvement, although three of these had hinted at other modes in their  
33 applications. A further application had been too vague to discern the mode of planned PPI, and  
34 another had no documented plans for PPI (Table 1).  
35  
36  
37  
38  
39

40 Based on informants’ accounts, all trials which had documented plans for PPI membership on their  
41 TSC had implemented this aspect of the plans. Researcher interviews were available for four of these  
42 six oversight trials and of these four, only one researcher divulged any personal expectations for PPI  
43 in the trial. Moreover, informants’ accounts raise concerns about the motivations for including PPI in  
44 their applications and the danger of assuming that contributors know what is expected of them. For  
45 example, Trial 36 had named a “patient representative” as a member of the TSC at the application  
46 stage then subsequently, in direct response to peer reviewer comments, the team had indicated that  
47 they would consider increasing the number of “patient representatives” on the TSC from one to two,  
48 in order to provide "mutual support". The team proceeded to include two PPI contributors on the  
49 TSC, thereby achieving their documented plans. Despite having prior experience of PPI however, the  
50  
51  
52  
53  
54  
55  
56  
57  
58  
59  
60

1  
2  
3 researcher divulged no personal expectations for PPI within this particular trial and referred to PPI as  
4 a 'tick box' exercise:  
5  
6

7 "It was a requirement of... that we had representation on our steering committee and  
8 therefore I went through that [...] We can say [the PPI contributors] are there and therefore  
9 it's, if you like, ticking a political box." (CI 36)  
10

11  
12 The documentation for Trial 2 included no plans for PPI during the trial but did state that there had  
13 been "several stages of user involvement" prior to the grant application, "to confirm that the  
14 research question is pertinent to both the needs of the NHS and the NIHR programme of research  
15 development". Two grant reviewers commented on the lack of "service user representation" on the  
16 team and suggested membership "on the research team or steering group". The TSC did include PPI  
17 membership but during the interview the researcher spoke of his initial "tokenism" and "ignorance"  
18 about how PPI "should and could work". When asked about the expectations of their role, the PPI  
19 contributors in two other oversight trials (115 and 96) implied similar uncertainties when they spoke  
20 of not knowing what was expected of them and of feeling "bewildered" in meetings:  
21  
22  
23  
24  
25  
26

27  
28 "I can't understand why they use me... they seem to find me useful but I just sit there  
29 bewildered. I'm there as a sort of grey background while the others do all the sparky stuff."  
30 (PPI 115)  
31

32  
33 In the next section we describe planned and implemented PPI in 14 trials which incorporated a  
34 managerial role of PPI. Unlike the six trials with a mainly oversight mode, many of the managerial  
35 mode trials had utilised more than one form of PPI.  
36  
37

### 38 **Beyond oversight, into managerial mode (n=14)**

39  
40 Most of these 14 trials had indicated some type of managerial involvement in the documented  
41 plans, usually to include PPI contributors as co-investigators (Table 1). Two trials (4 and 27) did not  
42 have PPI contributors as co-investigators but planned to include PPI contributors on the trial  
43 management group, and interviews with informants indicated that this had been implemented. It  
44 was unclear in one ongoing trial whether there was a PPI co-investigator, but documented plans  
45 stated that a named PPI collaborator would be "directly involved in decision making of trial  
46 processes and then relay back information to user groups"; according to the PPI contributor  
47 interview these plans were being implemented (Trial 18). Trial 10 had no documented plans for PPI  
48 but the interview with the CI indicated that there was a PPI co-investigator (Trial 10).  
49  
50  
51  
52  
53  
54  
55  
56  
57  
58  
59  
60

1  
2  
3 Informants' accounts indicated that all trials which had planned a managerial mode of PPI did  
4 implement it (Table 1). This included Trial 21, which had a PPI co-applicant and documented plans to  
5 involve user groups in developing information leaflets, consent forms, letters, and in questionnaire  
6 design. There was a budget for PPI travel and expenses which is perhaps indicative of careful  
7 planning. The documented plans stated that "user and consumer groups were very keen that a user  
8 was a collaborator on the grant application". The applicants also planned and included oversight PPI  
9 (TSC membership) and expanded beyond their plans to include contributors in recruitment, in the  
10 analysis and interpretation of results, and in dissemination. Although we could not pinpoint from the  
11 informant interviews exactly what prompted these additional PPI activities, the PPI contributor who  
12 we interviewed described his extensive previous experience in similar roles and noted that his role in  
13 this particular trial had "evolved". He also explained that "I'm there because I want to change things"  
14 (PPI 21) and this pro-active approach may have contributed to the expansion of PPI in this particular  
15 trial. Correspondingly, the CI spoke of wanting the PPI contributors to "feel welcomed and valued as  
16 part of the group", and had personal expectations for PPI that included PPI contributors helping with  
17 "running the study", "disseminating the results" and that "they would stay involved" and "feel able  
18 to speak out and have their own opinion":  
19  
20  
21  
22  
23  
24  
25  
26  
27  
28

29  
30 "We wanted them to offer to do things that they felt they could do and feel happy to say if  
31 they didn't feel they could do certain things that might come their way." (CI 21)  
32  
33

34 There were several examples akin to this among trials incorporating a managerial mode of PPI, in  
35 which CIs reported having personal expectations for PPI or in which PPI contributors appeared to be  
36 an integral member of the research team. However, one of two exceptions was Trial 14, in which  
37 documented plans had been to involve a PPI co-applicant "with an academic interest in representing  
38 patients' perspectives in the design and conduct of health care research", adding that this individual  
39 would advise on "the development of processes and materials which take into account patient  
40 concerns". Responses to the CI survey described the PPI contributor as "a serial patient  
41 representative". When interviewed, the CI divulged no personal expectations regarding PPI  
42 contribution, describing it as a "tick box exercise":  
43  
44  
45  
46  
47  
48

49 "The funders were insistent on having patient representation and wanted to know what that  
50 representation was on your grant submission." (CI 14)  
51  
52  
53

54 In summary, most trials which planned a managerial mode of PPI implemented it. However, as Trial  
55 14 shows, simply having a PPI co-investigator is not necessarily a guarantee of meaningful  
56 contribution if researchers have no expectations for PPI or if contributors are unable to provide the  
57  
58  
59  
60

1  
2  
3 input that a particular trial requires, for example because they are selected out of convenience  
4 rather than to match trial needs. In the next section we focus on the less formal, responsive, form of  
5 PPI in which researchers “reach out” for specific PPI input as and when needed.  
6  
7  
8  
9

#### 10 **“Reaching out” - responsive roles (n=14)**

11 Fourteen trials embraced some form of responsive involvement, although trial documents for two  
12 (10 and 79) had not indicated any plans for PPI (Table 1). The remaining 12 had stated in their  
13 documented plans that they would, or already did, engage with PPI groups or panels rather than just  
14 with the one or two individuals that was typical of oversight and managerial PPI. Data from  
15 application forms, project descriptions and informant interviews showed that this responsive activity  
16 sometimes entailed seeking advice from PPI groups prior to the application for funding. Informants  
17 noted that many trialists continued to seek advice from such groups during the trial regarding  
18 specific issues. Other trials began a responsive approach once the trial had commenced, often as and  
19 when particular problems arose. Most trials implemented all aspects of their documented plans but  
20 in one case (Trial 76) it was unclear from the CI interview whether specific plans to seek advice of a  
21 new advisory group before recruitment were implemented.  
22  
23  
24  
25  
26  
27  
28  
29  
30

31 Trial 20 used responsive alongside managerial PPI, including having a PPI co-applicant. The trial had  
32 ended at the time of the interviews, and the researcher stressed that the responsive PPI had been  
33 “crucial” when faced with specific problems. The CI explained that one PPI contributor would attend  
34 research team meetings:  
35  
36  
37  
38

39 “but I then reached out to other people in addition when we needed more help [...] I think  
40 what was crucial was being able to get input, not in terms of regular intervals but [...] when  
41 you’ve got a problem.” (CI 20)  
42  
43

44 Further illustrating the flexibility that responsive PPI allows, in her interview one of the PPI  
45 contributors on the same trial (who on this particular trial had a managerial role), advised  
46 researchers to “have some understanding” of the needs of PPI contributors. She then went on to  
47 refer to another contributor on the same trial who did not attend project meetings but who  
48 operated in a more responsive mode outside of meetings. It appeared this arrangement had evolved  
49 to accommodate the needs of the latter contributor, who, it seemed, found meetings difficult.  
50  
51  
52  
53  
54

55 “She didn’t really know what to do, so I think it was much more a one-to-one conversation  
56 which is what she was happy with rather than sitting in a committee.” (PPI 20)  
57  
58  
59  
60



1  
2  
3 Documented plans for Trial 7 involved a combination of oversight, managerial and responsive  
4 modes. This trial was collecting outcome data at the time of the researcher interview, and PPI plans  
5 were being implemented including consultation with a panel of service users who advised on issues  
6 such as how to increase participant response rates to the outcome questionnaire, and on the  
7 promotional material that accompanied it. When interviewed, the researcher spoke of her personal  
8 expectations that PPI would help to maximise recruitment, ensure the right outcomes were  
9 measured, and help in interpreting the findings. There was no PPI contributor interview but the  
10 researcher also spoke of having to tailor “different ways of involving people” in PPI depending on the  
11 “population of interest”:  
12  
13  
14  
15  
16

17  
18  
19 “It might be children, people from disadvantaged groups or older people [...] so you  
20 probably have to find other tailored ways of including people to make it effective. So it’s not  
21 a one size fits all.” (CI 7)  
22  
23

24  
25 The majority of those researchers interviewed who described such ‘as and when’ contributions  
26 (10/12) spoke of expectations for PPI, and tended to view responsive modes as constructive. Only in  
27 one case (Trial 101) did the researcher allude to the PPI within their trial as a “tick box” exercise.  
28  
29

30  
31 Three trials undertook additional responsive PPI activity that had not been specified in their  
32 documented plans. Trials 21 and 102 expanded on their plans by involving PPI contributors in a  
33 broader range of activities than initially indicated, namely advising on recruitment and interpretation  
34 and dissemination of study findings. As with Trial 21 (described in the Managerial Mode section  
35 above), we could not determine from the CI interview why plans for Trial 102 had been expanded  
36 upon, and there was no PPI contributor interview for Trial 102 to help illuminate this issue. The PPI  
37 contributor for the third trial (Trial 91) mentioned that she sought the views of “women’s groups”.  
38 This was additional to the documented plans for her to be involved in “protocol design of the study”.  
39 As with Trial 21, this PPI contributor had previous PPI experience and appeared to be a particularly  
40 active member of the research team, and with considerable knowledge of the relevant health  
41 condition.  
42  
43  
44  
45  
46  
47  
48

49  
50 In summary, most applicants implemented their documented plans for PPI regardless of the mode of  
51 planned involvement. In five cases we were unable to discern whether or not PPI plans were fully  
52 implemented, although some PPI was achieved in these trials. Regardless of whether PPI was  
53 implemented as planned or evolved, most trial teams faced challenges and learnt lessons about  
54  
55  
56  
57  
58  
59  
60

1  
2  
3 implementing PPI as they went along. We now turn to their accounts of this learning and then use  
4 these to derive practical advice for planning and implementing PPI.  
5  
6  
7

### 8 **Researchers on the challenges of PPI and lessons learnt**

9  
10 Most CIs spoke of the challenges they encountered in implementing PPI (Table 2) and things they  
11 would do differently as a result. The involvement of trial investigators' own patients as contributors  
12 was perceived to lead to a "conflict" (CI 20) between an investigator's research and clinical roles.  
13 This brought a risk that research would "cross over into clinical care" (CI 6), and that such  
14 contributors would be "out of their depth" (CI 20) and find it difficult to "say something which might  
15 imply a criticism of their clinician" (CI 20). CIs talked about the problems of failing to engage PPI  
16 contributors fully or early enough to inform changes in study design, and "under-utilising" (CI 101)  
17 PPI contributors by not involving them in the planning stages, thereby making PPI less thorough or,  
18 as one informant noted, less "robust" (CI 101). They reflected on the potential detrimental  
19 consequences of such failings on the relationship between researcher and PPI contributors, for  
20 example being less likely to "form a bond and get loyalty" (CI 14). Finding and engaging the right  
21 people with an interest in and understanding of the research, and with the necessary confidence,  
22 commitment and impartiality was another major stumbling block:  
23  
24  
25  
26  
27  
28  
29  
30  
31

32 "You hear that some consumers get involved [...] because they have a particular point of  
33 view or axe to grind [...] in those circumstances it could be very detrimental to a trial, to be  
34 driven by somebody who has had a bad experience [...] and those are the ones you don't  
35 want on your team. (CI 5)  
36

37 "You've got trialists in the [meeting] who are trained to run clinical trials. And then you've  
38 got one lay representative who may be slightly intimidated by everyone else, who'll not be  
39 able to truly give their views, may be slightly overawed." (CI 14)  
40  
41

42 Researchers also pointed to the practical difficulties that contributors experienced in attending  
43 meetings due to geographical distance or time constraints (Table 2). They emphasised how  
44 teleconferences could be less conducive to forming a relationship with PPI contributors than face-to-  
45 face meetings. They also reported problems relating to communication and mutual comprehension  
46 between themselves and PPI contributors. Some described PPI contributors as struggling to  
47 understand the nature of research, or the distinction between research and clinical practice, and one  
48 CI referred to his own "naivety" (CI 55) in underestimating how much training PPI contributors might  
49 need. CIs described difficulties getting other staff such as trial managers to understand or prioritise  
50 PPI. This included one CI who noted that some investigators are unable to "cope" with having a  
51  
52  
53  
54  
55  
56  
57  
58  
59  
60

1  
2  
3 “working relationship with service users” and “can’t let go of the fact that [they] are people they  
4 study”:

5  
6  
7 “It’s a mindset [...] an attitude where you have an equal partnership. You’re working  
8 together not studying these people. You’re asking for their expertise and I’ve found that  
9 some people who’ve worked with me, that comes easily and some people absolutely never  
10 get it.” (CI 20)  
11

12  
13 CIs remarked that they were unclear about what to expect in relation to PPI and worried about  
14 taking up the contributor's time. External forces also played a part in some cases: for example one CI  
15 described PPI contributors being “poached” by other studies, a “fight” with the university regarding  
16 paying a PPI contributor for his time, and disagreement with funders when a contributor wanted to  
17 add to the patient information sheet that he was a PPI contributor on the project (CI 21).  
18  
19  
20  
21

22  
23 CIs spoke of how they had learnt as the trial went along, revealing that their “practice had evolved”  
24 (CI 14) and their skills had “changed beyond recognition [...] now we’re much better equipped [...]”  
25 but at the time when [trial] started we had very little idea at all about what PPI involved or how it  
26 would help or how it would work” (CI 2).  
27  
28  
29  
30

31 In light of these challenges, CIs spoke of how in future they would involve more than one PPI  
32 contributor, in particular by using focus groups or panels of contributors rather than individual  
33 contributors, enlist the help of relevant charities, and conduct surveys or use social media when  
34 there was a “burning question” (CI 55). Use of responsive PPI rather than individual contributors was  
35 described as “gold standard” PPI (CI 14), as this avoided “the danger of having a single opinion” (CI  
36 76), provided structure for all parties, and helped to enhance the confidence of individual  
37 contributors.  
38  
39  
40  
41  
42

43  
44 “I would certainly have more involvement and some kind of framework around it [...] a small  
45 user group and set boundaries [...] try to agree how often we should meet and what peoples’  
46 roles and responsibilities are [...] and provided more structure [...] to make them feel that  
47 their views are important, and their involvement is very important, I think that would go a  
48 long way to easing the process.” (CI 41)  
49  
50

51 Many CIs indicated that they would extend PPI in future by asking contributors to lead in the  
52 dissemination of findings to relevant groups, help in the development of research questions, study  
53 design, and involve PPI contributors as co-investigators. CIs placed particular emphasis on how  
54 “crucial” it was to have “early input” (CI 14):  
55  
56  
57  
58  
59  
60

1  
2  
3 “The most useful things are [...] the design stage [...] RCTs you’ve got to plan ahead [...] after  
4 the development phase you shouldn’t really be changing anything [...] it is during that  
5 development phase when decisions are being made.” (CI 115)  
6

7 “Early engagement and appreciation that their input into the question is really important [...] with  
8 retrospect and for the future studies [...] more involvement at the front end, less in the  
9 middle and more at the end.” (CI 2)  
10

11  
12 Finally, CIs reflected on the importance of “thinking through” plans and being clear about whether,  
13 what and why PPI is needed for individual trials:  
14

15  
16  
17 “Be clear about the link between particular methods [of PPI] and particular benefits and  
18 challenges [...] it’s not all the same, there are so many ways of doing it but you have to have  
19 good reasons for choosing how to do it.” (CI 20)  
20

21 “I don’t think it should be automatic that there must be PPI involvement in every study, and  
22 different types of involvement are necessary for different parts of study. Having a core  
23 group is not necessarily the right thing because at different points there are different types  
24 of people and types of involvement that would be useful.” (CI 10)  
25  
26  
27  
28  
29  
30  
31  
32  
33  
34  
35  
36  
37  
38  
39  
40  
41  
42  
43  
44  
45  
46  
47  
48  
49  
50  
51  
52  
53  
54  
55  
56  
57  
58  
59  
60

### Contributors on the challenges of PPI and suggestions for improvement

Most PPI contributors mentioned challenges or difficulties linked to their involvement in the trial which may inform future research teams in planning and implementing PPI. Some of the contributors' challenges paralleled CIs' accounts while others were unique to the contributors (Table 2). While researchers referred to problems they had experienced in their communication with contributors, a prominent issue exclusively mentioned by contributors related to the problems they experienced with 'jargon' and the technical language that was used in trials such as statistical or medical terminology and acronyms. Several contributors suggested remedies such as supplying a list of acronyms or a booklet of research terms, or simply that "if they're going to use jargon, explain it" (PPI 64). A further idea was that the person chairing meetings could try to ensure that discussion about statistical issues or other areas of technical expertise were translated and summarised adequately. Contributors talked about difficulties in interacting with researchers, including not always feeling listened to by everyone. One contributor who had been invited by her consultant and had previous experience of PPI implied that "some doctors" were unwilling to understand the perspectives of patients (PPI2 27). Another felt that female researchers were more understanding than males regarding problems with travelling or feelings of insecurity, while a further contributor alluded to how in meetings the team sometimes talked about patient experiences in a "dispassionate" way, and although this was not a problem for the individual contributor she felt it might be for others (PPI1 27).

Some of the challenges that contributors described echoed those that the CIs has raised. These included lack of clarity about roles, and the difficulties contributors experienced in attending meetings, for instance because of a health condition. Such practical difficulties could give rise to additional complexities. For one contributor, infrequent meetings meant "not much to build a relationship on" and while academics worked closely together, she had to "work quite hard to keep up" (PPI 16). Contributors also talked about wanting to be more involved in between annual meetings, in "shaping the bid" (PPI 20) so that it was less focused on the primary clinical outcome, in seeing the intervention itself, and to have initial briefing meetings at the outset of their involvement. Finally, one contributor described it as a "downfall" that he was not receiving feedback or 'thank you's' and commented on how important it was to make PPI contributors "feel valued" (PPI 34).

## Discussion

### Main findings

*The path to PPI: plans, actions and complications*

1  
2  
3 This is the first study to examine whether plans for PPI, as documented in RCT grant applications, are  
4 being implemented. Based on the accounts of researchers and PPI contributors we found that most  
5 trialists are indeed putting their plans to action, although in some cases the plans were minimal and  
6 relatively easy to execute. There were a few trials for which we were unable to confirm whether  
7 plans were implemented in full, but all did incorporate some PPI. Many trials implemented multiple  
8 modes of PPI, which is both surprising and encouraging given that PPI was less prominent when the  
9 proposals for the trials in this cohort were being developed. CIs encountered complications from  
10 which they learnt valuable lessons. Uncertainty about what to expect of PPI and emergent  
11 challenges with their trials meant that involvement had to evolve. Difficulties finding and retaining  
12 suitable contributors and engaging in PPI 'too little too late' led trialists to say they would do things  
13 differently in future. Many reflected on how they would aim for earlier engagement next time and  
14 seek involvement from a more diverse source such as patient panels or focus groups. PPI  
15 contributors themselves mentioned that becoming involved after the trial had begun, or  
16 infrequently, resulted in missed opportunities for them to contribute. Some referred to uncertainty  
17 about their role and many struggled with jargon, an enduring problem despite the availability of  
18 apparently straightforward solutions.

### 30 *Pressured into PPI?*

31  
32 Regardless of statements about PPI in their funding application some trialists had no expectations of  
33 what PPI might achieve, and their only motivation for including PPI was a belief that it was necessary  
34 or would help to secure funding for their trial. Such strategic minimalism may be an inevitable side-  
35 effect of policies to promote or require PPI in trials. It may also reflect researchers' professed  
36 inexperience of PPI. A small number of trials did not have documented plans for PPI but all did  
37 nevertheless include some PPI, possibly influenced by reviewer and panel comments. However, one  
38 of these trials had been through several stages of PPI prior to the grant application and was  
39 requested to implement further PPI over the course of the trial. This highlights the predicament of  
40 researchers whose trial may have benefited from considerable PPI prior to funding (for example in  
41 feasibility and pilot work) and forecast that they would need relatively little PPI during the trial itself,  
42 only to find that funders insist on PPI at all stages. Many informants believed formative PPI prior to  
43 funding was one of the most useful, credible aspects of PPI. Particularly in cases where there has  
44 been extensive PPI prior to the main trial, it is important for all members of the research community  
45 to consider whether plans for ongoing PPI match the needs of a particular trial and at what stage(s)  
46 further PPI would be appropriate.

### Previous research

We found no previous reports on the extent to which documented plans for PPI within trials were subsequently implemented. There have been several accounts of challenges involved in implementing PPI which, while not in a trials context, endorse our findings. For instance, recent reports have referred to tokenism,[28, 29] or highlighted the potential challenges in identifying suitable individuals who are impartial and able to understand research methodologies, retain an interest, and commit long-term;[15, 17-19, 30] of researchers having little experience of PPI and being uncertain about what to expect;[15, 18, 31] and of jargon-related problems.[19, 32, 33] INVOLVE suggest that PPI contributors would benefit from a 'glossary of technical terms',[17] again something reflected in the suggestions from contributors within our study. Staley[4] refers to the challenge of ensuring that involvement is meaningful and not simply tokenistic. [Findings from the EPIC project regarding PPI training needs suggest that while informants were broadly receptive to PPI training for researchers, there was considerable reluctance regarding the training of PPI contributors, with a preference for 'informal inductions' \(Dudley et al 2014\(b\); under review; revision invited\). The health services researchers in a previous qualitative interview study varied in how they interpreted PPI policy and in their PPI 'working practices' and referred to how PPI brought a 'fear of the unknown'. \[31\] This study also points to a 'know-do' gap, whereby researchers' talk of the importance and value of PPI in the 'ideal' world, stood in contrast to their experiences of 'the reality' of implementing PPI in practice.](#)[29] The timing of involvement has been recently highlighted[3, 20] and is clearly an ongoing challenge which is exacerbated by financial and time constraints[8, 32] particularly during the grant-writing stage.

### Study limitations

We used a historical cohort of trials that had been funded four to eight years ago. Even in that short time the emphasis on PPI has grown and our findings may not reflect the planning and implementation of PPI in trials funded more recently. Some of the trials in our sample were also initiated and completed some time before the interviews. However, this limitation is offset somewhat by the inclusion of ongoing trials in which PPI activity was more recent and therefore easier to recollect. There were five trials for which it was not possible to determine whether all documented PPI plans had been fully implemented or not. In some cases informants clearly struggled to recall events for trials which had ended several years previously or where researchers were involved in a number of trials simultaneously. We explored with informants how PPI contributors were involved in the trials but did not directly quiz CIs about why certain plans within their application were not implemented. This was intentional as we did not want to pose questions

1  
2  
3 which may have seemed accusatory and have a detrimental impact on the rapport between  
4 informant and interviewer or risk informants becoming defensive. While some trialists seem to have  
5 expanded on their plans for PPI once the trial was underway there may, conversely, have been  
6 instances in which plans were not fully documented within the grant application.  
7  
8  
9

### 10 11 **Implications and tips for the trials community**

12 We have used the insights of informants to generate practical tips which may help future trialists  
13 and PPI contributors (Box 1). [We envisage that these be considered alongside previously published](#)  
14 [guidance for PPI in trials](#)[17, 20] [and consensus principles for PPI in health research](#).[34, 35] These  
15 [tips generated from evidence in our study](#) cover the importance of early planning, of timely and  
16 flexible PPI, and of communication and clarification of roles. They also stress the need to consider  
17 the difficulties posed by the use of “jargon”, and problems contributors experience in understanding  
18 certain aspects of the research process. The difficulties contributors experience with specialist or  
19 technical terminology have been widely reported.[19, 32, 33] Our data suggest that this problem has  
20 existed for some considerable time, and we outline the practical solutions suggested by PPI  
21 contributors. The tips in Box 1 could be used to inform PPI training and could be helpful in other  
22 types of health research. [Given that the usefulness of the points in Box 1 depends on researchers’](#)  
23 [willingness to genuinely engage with PPI, the tips we present](#) might also assist funding bodies and  
24 grant reviewers in determining whether submitted plans are fit for purpose. A study of the UK health  
25 and social care research community has recently informed the development of a Public Involvement  
26 Impact Assessment Framework (PiiAF), which emphasises the value of well thought-through  
27 planning before implementing PPI [as well as the subsequent evaluation of its impact](#),[36] and  
28 INVOLVE[17] have emphasised the importance of clear guidance about roles. However, researchers  
29 also need some scope for flexibility and contingency in planning PPI: our finding that some trialists  
30 expanded their sometimes already detailed plans supports the need for flexible and iterative  
31 approaches to PPI in order to accommodate the unexpected and respond to opportunities and  
32 difficulties as they arise.  
33  
34  
35  
36  
37  
38  
39  
40  
41  
42  
43  
44  
45  
46  
47  
48  
49  
50  
51  
52  
53  
54  
55  
56  
57  
58  
59  
60



### Box 1 Tips for planning and implementing PPI in clinical trials

#### Early PPI

*"You've got to plan ahead"*

- Begin planning PPI and consulting with contributors when starting to plan the trial
- Consider including PPI contributors in managerial roles e.g. as co-investigators

Researchers and PPI contributors emphasised how early and regular involvement allowed contributors to input more effectively. PPI prior to the trial (for example in contributions to grant writing, trial design, feasibility studies) was a key aspect of PPI, and in some cases the most important one.

#### Flexible PPI

*"One size does not fit all" "Reaching out was crucial"*

- Consider whether oversight PPI (e.g. on a TSC) is sufficient to meet trial needs
- Involve more than one or two PPI contributors, more than once or twice a year
- 'Reach out' and make use of multiple modes of PPI, including responsive PPI

PPI is context-specific so it is important to tailor PPI to the emergent needs of trials and be creative to encourage active engagement. Researchers felt that involving contributors beyond an oversight role, i.e. not just as a member of the steering committee but in a managerial or responsive capacity helped to foster meaningful PPI. In terms of responsive PPI, liaison with relevant patient panels or groups may be particularly helpful when more diverse perspectives or wider consensus is needed; [individuals might also consider whether surveys \(e.g. of support group members\) would be useful in answering 'burning questions' for example regarding the acceptability of timing or format of interventions or data collection, or qualitative research to gain deeper understanding.](#)

#### Communication, clarification, and interaction

*"I can't understand why they use me. I just sit there bewildered"*

- Negotiate with contributors at an early stage about what they can bring to the trial and what they want to bring
- Determine whether this matches the trial's needs and clarify roles and expectations
- Be sensitive to contributors' needs and preferences

Communication between researchers and PPI contributors is crucial at the outset to clarify roles and expectations, and throughout the trial to optimise engagement and provide feedback about contributions. It may be that particular contributors do not have the insights a trial needs, or maybe trialists need to rethink their plans for PPI in the light of experience. Researchers should avoid seeming "dispassionate" during meetings when discussing a particular illness or condition that impacts on the lives of PPI contributors, and make a genuine effort to understand contributors' points of view.

#### Language of research

*"Break it down into a language everybody understands."*

- Minimise and explain jargon
- Provide glossaries and 'translations' where applicable

Researchers and contributors should discuss their written and verbal communication preferences and

1  
2  
3  
4  
5  
6  
7  
8  
9  
10  
11  
12  
13  
14  
15  
16  
17  
18  
19  
20  
21  
22  
23  
24  
25  
26  
27  
28  
29  
30  
31  
32  
33  
34  
35  
36  
37  
38  
39  
40  
41  
42  
43  
44  
45  
46  
47  
48  
49  
50  
51  
52  
53  
54  
55  
56  
57  
58  
59  
60

how to minimise and explain jargon. Suggestions for minimising jargon included lists of acronyms or glossaries of research terms. PPI contributors should be prepared to speak up if there is a problem and, with the help of researchers, be willing to acquaint themselves with specialist terms over time.

### Budgeting for PPI

*"University didn't want to pay him the money" "We had money in the pot but only for one PPI"*

- Budget for PPI – think about contributors' time plus expenses
- Explore opportunities for pre-trial support for PPI

Well thought-through plans will help inform how much to 'cost in' for PPI. Consult with administrators in your organisation at an early stage to iron out processes for payments to PPI contributors. Talk to contributors to make sure they will be happy to accept reimbursement beyond expenses. Find out whether there are any local or national resources to support PPI prior to funding applications.

### Fit for purpose PPI

*"The person we chose had very little engagement, it struck me as a complete waste of time"*

- Agree what types of PPI would be appropriate and understand why
- Consider benefits of involving those with experience of the condition
- Recognise potential drawbacks of involving those under current care of the researcher

Think through plans for PPI and centre them round the aims and needs of the trial. Agreement about and understanding of *what* and *why* PPI is needed will help in planning it. Involving people with experience of the condition, intervention or service where applicable may be particularly germane in identifying research priorities and enhancing trial design. However, the inclusion of patients under the current care of a team member may lead to difficulties for both researchers and contributors.

### Ticking several boxes could equate to expensive token gestures: Implications for funders

Our findings endorse recent revisions to the NIHR's standard application form, which now require applicants to clearly define their proposed PPI activity. Asking researchers to specify and explain the type of involvement they envisage and what they expect it to achieve is a step in the right direction and should help to minimise "tick box" tactics and token gestures. However, the risk of strategic minimalism remains if plans are not afforded careful, context-specific consideration by funders and reviewers. Equally, there is a risk of inadvertent PPI profligacy, that is, the encouragement of elaborate plans for PPI that are disproportionate to the needs of a trial. Ticking several boxes rather than just one box could equally be a token gesture, as well as an expensive one. Therefore, researchers might be encouraged to think just as much about *why*, *how* and *when* PPI [will be useful](#), as about *what* and *how much* PPI.

Researchers are also now asked to describe, in their grant applications, any PPI activity that they have undertaken prior to submitting the application. Funding is available to support pre-application

1  
2  
3 PPI, for example the UK-based NIHR Research Development Service offers very small grants, which  
4 others have found to be helpful. [37, 38] However, these grants are not easily or quickly accessible,  
5 particularly for those working to the typically tight deadlines of funding calls. Paradoxically, this  
6 renders pre-application PPI the most difficult to implement, even though our findings indicate that it  
7 is often most useful at this stage. Innovative organisations that involve patients at a meta-trial level  
8 in research priority setting [http://www.lindalliance.org/Patient\\_Clinician\\_Partnerships.asp](http://www.lindalliance.org/Patient_Clinician_Partnerships.asp) and in  
9 schemes such as COMET (Core Outcome Measures in Effectiveness Trials) [39, 40] which promotes  
10 the involvement of patients in developing “core outcome sets”, are providing knowledge and  
11 resources that individual trials can use. However, at the level of individual trials infrastructural  
12 support for early PPI is also needed. While there have been innovations in this area, for example the  
13 US-based Patient-Centred Outcomes Research Institute has recently announced a number of  
14 ‘Pipeline to Proposals’ Engagement Awards, [6] such moves are relatively novel, and similar steps by  
15 other organisations would be beneficial. As well indicating the need for structures and resources to  
16 support PPI, our findings point to the importance of PPI that is fit for purpose, realistic and  
17 proportionate. We found that trialists who fully implemented a primarily oversight mode of PPI  
18 perceived little value in this involvement – a related article from our study will fully explore the  
19 perceived impact of PPI in this cohort (Dudley et al 2014(a); under review; revision invited). While  
20 oversight PPI seemed limited in terms of its practical impact, arguably it may serve important ethical  
21 and moral functions. However, in order to avoid inadvertently promoting PPI that is devoid of any  
22 function for both researchers and contributors, as we note above, funders should take full account  
23 of any PPI which has taken place prior to funding applications as well as encourage applicants to  
24 justify future plans for involvement. The NIHR HTA programme states: “*While patient and public*  
25 *involvement (PPI) may not always be needed for all types of research, it is always relevant for HTA*  
26 *trials.*” [http://www.nets.nihr.ac.uk/\\_data/assets/pdf\\_file/0003/77160/Preparing-a-full-application-](http://www.nets.nihr.ac.uk/_data/assets/pdf_file/0003/77160/Preparing-a-full-application-for-the-Clinical-Trials-and-Evaluation-Board.pdf)  
27 [for-the-Clinical-Trials-and-Evaluation-Board.pdf](http://www.nets.nihr.ac.uk/_data/assets/pdf_file/0003/77160/Preparing-a-full-application-for-the-Clinical-Trials-and-Evaluation-Board.pdf) (last accessed 09 March 2014). Even if there is  
28 consensus that PPI is relevant for all trials, it may not be relevant at all stages of all trials. Equally,  
29 funders may wish to contemplate- how ‘contingency’ resources could be made available for those  
30 trials that encounter unexpectedly intense needs for PPI over the course of their implementation.  
31  
32  
33  
34  
35  
36  
37  
38  
39  
40  
41  
42  
43  
44  
45  
46  
47  
48  
49

50 Our findings add fuel to recent drives and initiatives to promote the assessment and reporting of PPI  
51 processes [6, 28, 30] [http://www.journalslibrary.nihr.ac.uk/authors/report-preparation/report-](http://www.journalslibrary.nihr.ac.uk/authors/report-preparation/report-contents/14)  
52 [contents/14](http://www.journalslibrary.nihr.ac.uk/authors/report-preparation/report-contents/14) including the GRIPP checklist. [41] The CONSORT (Consolidated Standards of Reporting  
53 Trials) Statement, which was established specifically to encourage adequate reporting of RCTs, does  
54 not cover PPI. We suggest that consideration be given to incorporating advice on reporting of PPI in  
55  
56  
57  
58  
59  
60

1  
2  
3 the [main](#) CONSORT checklist, [so that reference to PPI is incorporated \*within\* the main reports of](#)  
4 [trials, alongside separate detailed reports on PPI, in line with the GRIPP checklist](#). If, in planning their  
5  
6 PPI, trialists are prepared to consider and report its outcomes not only in terms of what happened  
7  
8 and how, but also how this matched the needs of the trial, whether any complications arose or  
9  
10 adaptations were made, and what lessons were learnt, then the evidence base will grow and the  
11  
12 research community as a whole can learn. The EPIC project has highlighted the value of listening to  
13  
14 the accounts of PPI contributors as well as researchers, and this should feed into the evaluation and  
15  
16 reporting of PPI.

### 17 18 **Conclusions**

19 While most trialists fully implemented their documented plans for PPI there were traces of a  
20  
21 minimalist approach. Planning and engaging PPI contributors early, and beyond a primarily oversight  
22  
23 role, seems to be the most salient message from this analysis. At the same time some degree of  
24  
25 flexibility within plans is prudent, and making allowances for the unexpected may help all  
26  
27 stakeholders to make the most of PPI. The involvement of investigators' current patients as PPI  
28  
29 contributors should be given cautious consideration as there is the potential for conflict between  
30  
31 clinical and research roles. PPI activity prior to funding is as integral to meaningful involvement as  
32  
33 PPI activity during trials, and more so in some cases. Proper and flexible planning by research teams  
34  
35 will be instrumental in helping them to monitor, adapt and report PPI during and after trials, and in  
36  
37 helping the research community as a whole learn how to optimise PPI.  
38  
39  
40  
41  
42  
43  
44  
45  
46  
47  
48  
49  
50  
51  
52  
53  
54  
55  
56  
57  
58  
59  
60

**What is already known?**

\* PPI is becoming an expectation and often a pre-requisite for research funding and favourable ethical opinions

\* While the evidence base for PPI has recently grown, many unknowns remain, particularly in relation to PPI in clinical trials

\* There has been no systematic investigation of the extent to which documented plans for PPI in trials are ultimately put into practice, the challenges faced along the way, or subsequent lessons learnt

**What does this study add?**

\* In our study of funded clinical trials, almost all put their documented plans for PPI into practice

\* Trialists learnt that a chiefly oversight role and late initiation of PPI were often inadequate and that involving current patients of the trial team as PPI contributors can be problematic

\* PPI activity prior to, and alongside the development of, grant applications should be more widely acknowledged, encouraged and resourced

\* Trialists' plans for PPI will benefit from built-in flexibility in order to undertake 'as and when', purposeful engagement

**Department of Health Disclaimer:**

The views and opinions expressed therein are those of the authors and do not necessarily reflect those of the HS&DR, NIHR, NHS or the Department of Health.

**Acknowledgements**

We acknowledge the help and support of the NIHR HTA in establishing the cohort documentation. Alison Allam, Philip Bell, Heather Goodare and Alison Walker formed the EPIC Patient Advisory Group. All members commented upon the interview schedules and manuscript. We also acknowledge the late Neil Formstone, former member of the advisory group.

**Competing interests:** All authors have completed the ICMJE uniform disclosure form at [www.icmje.org/coi\\_disclosure.pdf](http://www.icmje.org/coi_disclosure.pdf). BH reports grants from the National Institute for Health Research, during the conduct of the study. BH received personal fees from NIHR, the Medical Research Council, and the User Involvement Shared Learning Group. DB, LD, CG. JP and PW have nothing to disclose.

**Transparency declaration:** the lead author (the manuscript's guarantor) affirms that the manuscript is an honest, accurate, and transparent account of the study being reported; that no important aspects of the study have been omitted; and that any discrepancies from the study as planned have been explained.

**Funding:** The study was jointly funded by NIHR HS&DR and INVOLVE (project number 10/2001/29). The study was conducted independently of the funders and competing interests have been declared. The University of Liverpool were sponsors of the project.

**Copyright:** the Corresponding Author has the right to grant on behalf of all authors and does grant on behalf of all authors, an exclusive licence (or non-exclusive for government employees) on a worldwide basis to the BMJ Publishing Group Ltd to permit this article (if accepted) to be published in BMJ editions and any other BMJ PGL products and sublicenses such use and exploit all subsidiary rights, as set out in our licence.

**Data sharing statement:** no additional data available.

**Author contribution statement:**

Deborah Buck was involved in conducting qualitative data analysis and interpretation, and writing the manuscript.

Carrol Gamble conceived the idea for the research, led the development of the grant application and project, developed the interview schedules, contributed to interpretation, reviewed drafts of the manuscript, and agreed the final version of the manuscript.

Louise Dudley was involved in developing the interview schedules, recruiting informants to the study, conducting the qualitative interviews, interpreting the findings, reviewing drafts of the manuscript and agreeing the final version of the manuscript.

Jennifer Preston contributed to the project specification, development of the interview schedules, interpretation of the findings, commented on the manuscript and led the coordination of the EPIC Patient Advisory Group.

Bec Hanley contributed to the project specification, commented on the manuscript and co-led the coordination of the EPIC Patient Advisory Group.

Paula Williamson contributed to the project specification and provided comments on the manuscript.

Bridget Young contributed to the grant application and project specification, designed the qualitative components, led in all aspects of their development, implementation, analysis and interpretation, reviewed all drafts of the manuscript, and agreed the final version of the manuscript.

## References

1. Gradinger F, Britten N, Wyatt K, et al. Values associated with public involvement in health and social care research: a narrative review. *Health Expect* 2013 doi: 10.1111/hex.12158
2. Stewart R, Liabo K. Involvement in research without compromising research quality. *Journal of Health Services Research & Policy* 2012;**17**(4):248-51 doi: DOI 10.1258/jhsrp.2012.011086
3. Barber R, Beresford P, Boote J, et al. Evaluating the impact of service user involvement on research: A prospective case study. *Int J Consumer Studies* 2011;**35**:609-15
4. Staley K. Exploring impact: Public involvement in NHS, public health and social care research. 2009. [http://www.invo.org.uk/wp-content/uploads/2011/11/Involve\\_Exploring\\_Impactfinal28.10.09.pdf](http://www.invo.org.uk/wp-content/uploads/2011/11/Involve_Exploring_Impactfinal28.10.09.pdf) (accessed 31 March 2014)
5. Goodare H, Smith R. The rights of patients in research. *Bmj* 1995;**310**(6990):1277-8
6. Selby JV, Lipstein SH. PCORI at 3 years--progress, lessons, and plans. *The New England journal of medicine* 2014;**370**(7):592-5 doi: 10.1056/NEJMp1313061
7. Snape D, Kirkham J, Preston J, et al. Exploring areas of consensus and conflict around values underpinning public involvement in health and social care research: a modified Delphi study. *BMJ Open* 2014;**4**(1):e004217 doi: 10.1136/bmjopen-2013-004217
8. Saunders C, Girgis A. Status, challenges and facilitators of consumer involvement in Australian health and medical research. *Health Res Policy Syst* 2010;**8**:34 doi: 10.1186/1478-4505-8-34
9. Hull D, Barton D, Guo K, et al. Patient and public involvement to support liver disease research. *Br J Nurs* 2012;**21**(16):972-6
10. Robinson L, Newton J, Dawson P. Professionals and the public: power or partnership in health research? *J Eval Clin Pract* 2012;**18**(2):276-82 doi: 10.1111/j.1365-2753.2010.01572.x
11. Department of Health. Best Research for Best Health: A new national health research strategy. 2006. London: Department of Health.
12. National Institute of Health Research. Patient and public involvement. Available: <http://www.nets.nihr.ac.uk/ppi> Accessed 5 December 2013.
13. Godlee F. Towards the patient revolution. *BMJ* 2014;**348**:g1209 doi: 10.1136/bmj.g1209
14. Simpson A, Jones J, Barlow S, et al. Adding SUGAR: service user and carer collaboration in mental health nursing research. *J Psychosoc Nurs Ment Health Serv* 2014;**52**(1):22-30 doi: 10.3928/02793695-20131126-04
15. Mockford C, Staniszewska S, Griffiths F, et al. The impact of patient and public involvement on UK NHS health care: a systematic review. *Int J Qual Health Care* 2012;**24**(1):28-38 doi: 10.1093/intqhc/mzr066
16. Khwaja AI. Is increasing community participation always a good thing? *Journal of the European Economic Association* 2004;**2**:10



- 1  
2  
3 17. INVOLVE. Public involvement in clinical trials: Supplement to the briefing notes for researchers.  
4 2012. Eastleigh: INVOLVE.  
5  
6  
7 18. Vale CL, Thompson LC, Murphy C, et al. Involvement of consumers in studies run by the Medical  
8 Research Council Clinical Trials Unit: results of a survey. *Trials* 2012;13:9 doi: 10.1186/1745-6215-13-  
9 9  
10  
11 19. Boote J, Baird W, Beecroft C. Public involvement at the design stage of primary health research: a  
12 narrative review of case examples. *Health Policy* 2010;95(1):10-23 doi:  
13 10.1016/j.healthpol.2009.11.007  
14  
15 20. Evans BA, Bedson E, Bell P, et al. Involving service users in trials: developing a standard operating  
16 procedure. *Trials* 2013;14:219 doi: 10.1186/1745-6215-14-219  
17  
18 21. Boote J, Baird W, Sutton A. Public involvement in the design and conduct of clinical trials: a  
19 review. *Int J Interdisciplinary Social Sciences* 2011;5(11):91-111  
20  
21 22. Gamble C, Dudley L, Allam A, et al. Patient and public involvement in the early stages of clinical  
22 trial development: a systematic cohort investigation. *BMJ Open* 2014;4:e005234.  
23 doi:10.1136/bmjopen-2014-005234  
24  
25 23. Braun V, Clarke V. Using thematic analysis in psychology. *Qualitative Research in Psychology*  
26 2006;3(2):83 doi: 10.1191/1478088706qp063oa  
27  
28 24. Salmon P, Peters S, Rogers A, et al. Peering through the barriers in GPs' explanations for declining  
29 to participate in research: the role of professional autonomy and the economy of time. *Fam Pract*  
30 2007;24(3):269-275 doi: 10.1093/fampra/cmm015  
31  
32 25. Ritchie J, Spencer L. Qualitative data analysis for applied policy research. In: Burgess RG, Bryman  
33 A, eds. *Analyzing Qualitative Data*. London: Routledge:173-94  
34  
35 26. Shenton AK. Strategies for ensuring trustworthiness in qualitative research projects. *Education*  
36 for Information 2004;22:63-75  
37  
38 27. Mays N, Pope C. Qualitative research in health care. Assessing quality in qualitative research.  
39 *BMJ* 2000;320:50-52  
40  
41 28. Snape D, Kirkham J, Britten N, et al. Exploring perceived barriers, drivers, impacts and the need  
42 for evaluation of public involvement in health and social care research: a modified Delphi study. *BMJ*  
43 *Open* 2014;4(6):e004943 doi: 10.1136/bmjopen-2014-004943  
44  
45 29. Ward PR, Thompson J, Barber R, et al. Critical perspectives on 'consumer involvement' in health  
46 research: Epistemological dissonance and the know-do gap. *J Sociology* 2010;46(1):63-82 doi:  
47 10.1177/1440783309351771  
48  
49 30. Mathie E, Wilson P, Poland F, et al. Consumer involvement in health research: a UK scoping and  
50 survey. *International Journal of Consumer Studies* 2014;38(1):35-44 doi: 10.1111/ijcs.12072  
51  
52 31. Thompson J, Barber R, Ward PR, et al. Health researchers' attitudes towards public involvement  
53 in health research. *Health Expect* 2009;12(2):209-220 doi: 10.1111/j.1369-7625.2009.00532.x  
54  
55  
56  
57  
58  
59  
60

- 1  
2  
3 32. Staniszewska S, Jones N, Newburn M, et al. User involvement in the development of a research  
4 bid: barriers, enablers and impacts. *Health Expect* 2007;10(2):173-83 doi: 10.1111/j.1369-  
5 7625.2007.00436.x  
6
- 7 33. Hewlett S, Wit M, Richards P, et al. Patients and professionals as research partners: challenges,  
8 practicalities, and benefits. *Arthritis Rheum* 2006;55(4):676-80 doi: 10.1002/art.22091  
9
- 10 34. Boote J, Barber R, Cooper C. Principles and indicators of successful consumer involvement in NHS  
11 research: results of a Delphi study and subgroup analysis. *Health Policy* 2006;75(3):280-297 doi:  
12 10.1016/j.healthpol.2005.03.012  
13
- 14 35. Telford R, Boote JD, Cooper CL. What does it mean to involve consumers successfully in NHS  
15 research? A consensus study. *Health Expect* 2004;7(3):209-220 doi: 10.1111/j.1369-  
16 7625.2004.00278.x  
17
- 18 36. PiiAF Study Group. The Public Involvement Impact Assessment Framework: executive Summary.  
19 Available: <http://piiaf.org.uk/documents/exec-summary-0114.pdf> Accessed 5 March 2014.  
20  
21
- 22 37. Boote JD, Twiddy M, Baird W, et al. Supporting public involvement in research design and grant  
23 development: a case study of a public involvement award scheme managed by a National Institute  
24 for Health Research (NIHR) Research Design Service (RDS). *Health Expect* 2013 doi:  
25 10.1111/hex.12130  
26
- 27 38. Walker DM, Pandya-Wood R. Can research development bursaries for patient and public  
28 involvement have a positive impact on grant applications? A UK-based, small-scale service  
29 evaluation. *Health Expect* 2013 doi: 10.1111/hex.12127  
30  
31
- 32 39. Williamson P, Clarke M. The COMET (Core Outcome Measures in Effectiveness Trials) Initiative:  
33 Its Role in Improving Cochrane Reviews. *The Cochrane database of systematic reviews*  
34 2012;5:Ed000041 doi: 10.1002/14651858.ed000041  
35
- 36 40. Williamson PR, Altman DG, Blazeby JM, et al. Developing core outcome sets for clinical trials:  
37 issues to consider. *Trials* 2012;13:132 doi: 10.1186/1745-6215-13-132  
38
- 39 41. Staniszewska S, Brett J, Mockford C, et al. The GRIPP checklist: strengthening the quality of  
40 patient and public involvement reporting in research. *Int J Technol Assess Health Care*  
41 2011;27(4):391-9 doi: 10.1017/S0266462311000481  
42  
43  
44  
45  
46  
47  
48  
49  
50  
51  
52  
53  
54  
55  
56  
57  
58  
59  
60

1  
2  
3  
4  
5  
6  
7  
8  
9  
10  
11  
12  
13  
14  
15  
16  
17  
18  
19  
20  
21  
22  
23  
24  
25  
26  
27  
28  
29  
30  
31  
32  
33  
34  
35  
36  
37  
38  
39  
40  
41  
42  
43  
44  
45  
46  
47  
48  
49

**Table 1 Summary of planned and implemented PPI activity by type of role**

|                                                                                                                 |
|-----------------------------------------------------------------------------------------------------------------|
| Based on informants’ accounts, it was unclear whether the trial fully implemented or was implementing all plans |
| Based on informants’ accounts, the trial did what planned in that PPI had been or was being fully implemented   |
| n/a No documented plans                                                                                         |

| Trial id<br>Status (trial ended or ongoing)<br>Mode(s)    | Summary of planned activity*                                                                                                                                                                                                                       | PPI plans fully implemented?<br>Y=yes<br>U=unclear | Accounts of ‘actual’ PPI activity**                                                                                                                                                                                                                                                                    |
|-----------------------------------------------------------|----------------------------------------------------------------------------------------------------------------------------------------------------------------------------------------------------------------------------------------------------|----------------------------------------------------|--------------------------------------------------------------------------------------------------------------------------------------------------------------------------------------------------------------------------------------------------------------------------------------------------------|
| <b>a) Trials which had a chiefly oversight mode (n=6)</b> |                                                                                                                                                                                                                                                    |                                                    |                                                                                                                                                                                                                                                                                                        |
| 115<br>Ended<br>Oversight                                 | Unclear whether trial had PPI co-applicants although service user contributed to the proposal.<br>“We will make use of two primary care research networks and an exercise research network.”                                                       | U                                                  | Had PPI membership on TSC but unclear in terms of “making use of research networks”. CI had expectations for and prior experience of PPI; no challenges. PPI contributor had prior experience of PPI; challenges (problems getting to meetings because of health).                                     |
| 36<br>Ongoing<br>Oversight                                | No PPI co-applicants.<br>Patient rep was named as a member of the TSC.<br>In response to referee comments, applicants stated they would consider increasing the number of PPI contributors on the TSC from one to two "to provide mutual support". | Y                                                  | Has 2 PPI contributors on TSC but CI talked of “no direct impact” and “ticking a political box”. CI had no expectations for but had prior experience of PPI; challenges (“only very minor such as patient rep not having email”). PPI contributor had no prior experience of PPI; challenges (jargon). |
| 65<br>Ended<br>Oversight                                  | No PPI co-applicants.<br>“We will have lay representation on the TSC.<br>We will use the expertise and contacts of our panel to form focus groups to assist in the understanding and dissemination of findings.”                                   | U                                                  | Had PPI membership on TSC as planned but unclear whether implemented plans regarding the use of the panel/focus groups to understand/disseminate findings. CI felt no direct PPI involvement overall. CI                                                                                               |

|                                                                      |                                                                                                                                                                                                                                                                                                                                                                                                                                                                                                                                                                                                                             |     |                                                                                                                                                                                                                                                                                                                                                                                                                                                                       |
|----------------------------------------------------------------------|-----------------------------------------------------------------------------------------------------------------------------------------------------------------------------------------------------------------------------------------------------------------------------------------------------------------------------------------------------------------------------------------------------------------------------------------------------------------------------------------------------------------------------------------------------------------------------------------------------------------------------|-----|-----------------------------------------------------------------------------------------------------------------------------------------------------------------------------------------------------------------------------------------------------------------------------------------------------------------------------------------------------------------------------------------------------------------------------------------------------------------------|
|                                                                      |                                                                                                                                                                                                                                                                                                                                                                                                                                                                                                                                                                                                                             |     | had no expectations for but had prior experience of PPI; challenges (getting the right people engaged; difficult target population; unable to get enough early engagement to inform changes to study design). No PPI contributor interview.                                                                                                                                                                                                                           |
| 2<br>Ongoing<br>Oversight                                            | No PPI co-applicants.<br>No documented plans. Did refer to PPI that had occurred prior to grant application.                                                                                                                                                                                                                                                                                                                                                                                                                                                                                                                | n/a | Has PPI membership on TSC. CI had no expectations for but had prior experience of PPI although spoke of initial “tokenism” and “ignorance” about what to expect of PPI in current trial; challenges (“just the slight feeling that we were taking up her time”). No PPI contributor interview.                                                                                                                                                                        |
| 64<br>Ended<br>Oversight                                             | No PPI co-applicants.<br>“We have identified two people with [condition] who have agreed to be consumer reps and have advised on the development of this proposal.”                                                                                                                                                                                                                                                                                                                                                                                                                                                         | Y   | No CI interview. Had PPI membership on TSC. PPI contributor had no prior experience of PPI; challenges (jargon, unable to attend all the meetings, some team members were felt to lack understanding).                                                                                                                                                                                                                                                                |
| 96<br>Ongoing<br>Oversight                                           | No PPI co-applicants.<br>“A patient representative will provide input into the design of patient literature and trial presentations to a general audience as well as providing a patient’s perspective at TSC and [Data Monitoring and Ethics Committee] meetings. TSC will meet two to three times a year.”                                                                                                                                                                                                                                                                                                                | Y   | No CI interview. Has PPI membership on TSC. “Keep in contact” approximately twice a year. PPI contributor had no prior experience of PPI; no challenges.                                                                                                                                                                                                                                                                                                              |
| <b>b) Trials which included a managerial mode (n=14)<sup>‡</sup></b> |                                                                                                                                                                                                                                                                                                                                                                                                                                                                                                                                                                                                                             |     |                                                                                                                                                                                                                                                                                                                                                                                                                                                                       |
| 20<br>Ended<br>Managerial +<br>responsive                            | Had a PPI co-applicant.<br>“The research team will convene a steering group of research and service users. This will meet three times during the study and will provide an opportunity for the research team to consult about research design and methods for data collection, choice of outcomes and methods for data analyses. The TSC will have an important role in interpreting initial findings and developing dissemination strategies. Consultation with young people and parents will be carried out in intervention and comparison clinics using focus groups. The views gathered in these groups will inform the | Y   | Had input from four PPI contributors at different times. Membership on TSC. Sought additional input when struggling with particular issues. CI had expectations for and prior experience of PPI; challenges (having a contributor who was a patient of the lead PI - “conflict of roles”; frustration at inability to integrate contributors’ ideas regarding questionnaire which was a validated instrument and therefore could not be altered.) PPI contributor had |

|                                                            |                                                                                                                                                                                                                                                                                                                                                                                                                                                                                                                                                                                                                                                                                                                     |   |                                                                                                                                                                                                                                                                                                                                                                                                                                                             |
|------------------------------------------------------------|---------------------------------------------------------------------------------------------------------------------------------------------------------------------------------------------------------------------------------------------------------------------------------------------------------------------------------------------------------------------------------------------------------------------------------------------------------------------------------------------------------------------------------------------------------------------------------------------------------------------------------------------------------------------------------------------------------------------|---|-------------------------------------------------------------------------------------------------------------------------------------------------------------------------------------------------------------------------------------------------------------------------------------------------------------------------------------------------------------------------------------------------------------------------------------------------------------|
|                                                            | development of research procedures (e.g. consent, outcome measures), tools for data collection and the process evaluation. Focus groups will also provide opportunity for young people to contribute to interpretation of study findings. Further consultation with young people will involve piloting all research tools to ensure acceptability and appropriateness.”                                                                                                                                                                                                                                                                                                                                             |   | no prior experience except as charity member; no challenges.                                                                                                                                                                                                                                                                                                                                                                                                |
| 21<br>Ended<br>Oversight +<br>managerial +<br>responsive   | Had a PPI co-applicant.<br>“User and consumer groups have discussed the application and suggested changes to protocol which we have accepted. In the trial the groups will be asked to help with development of info leaflets, consent forms, letters, questionnaire design. The groups were very keen that a user was a collaborator on grant application. The team includes [name], a consumer representative who is chair of [Consumer Research Group], works with the [condition] Association and the [Research Network].”                                                                                                                                                                                      | Y | Had PPI co-applicant. Plans expanded (in terms of recruitment, analysis, interpretation of results, dissemination). CI had expectations for and prior experience of PPI; challenges (“poaching” of contributors; stress about funding/paying contributors for their time if in receipt of benefits/pension; disagreement with funders regarding contributor’s activities). PPI contributor had prior experience of PPI; challenges (time; being in demand). |
| 27<br>Ongoing<br>Oversight +<br>managerial +<br>responsive | No PPI co-applicants.<br>“We will include two [condition] patients to act in an advisory capacity. They will be invited to attend all collaborator meetings and quarterly trial management meetings. We will disseminate project information and findings for patients and patient groups.”                                                                                                                                                                                                                                                                                                                                                                                                                         | Y | Has PPI membership on trial management, steering, and data monitoring groups. CI had expectations for and prior experience of PPI; challenges (finding contributors). 2 PPI contributors interviewed had no prior experience of PPI; challenges (some doctors don’t want to understand your point of view; jargon; they talk about things you have gone through as a patient in a dispassionate way).                                                       |
| 16<br>Ongoing<br>Oversight +<br>managerial                 | Had a PPI co-applicant.<br>“[Name] is Head of Policy and Research at [name of a national trust]. She has extensive experience of representing the views of the consumer in clinical research and at local and national policy levels. [She] will ensure that the perspective of the consumer remains central during all stages of the trial. Independent user representative(s) will be included on the TSC. The role of user representatives on the Data Monitoring Committee is more difficult because of the complex technical nature of the role of this committee. However, once a Chair of the Data Monitoring Committee has been appointed, we will discuss with the Chair their views about the composition | Y | Has PPI co-applicant. CI had expectations for and prior experience of PPI; challenges (finding the right people; consumer groups with a specific interest and so may be “partisan”). PPI contributor had prior experience of PPI; challenges (jargon; infrequent meetings ‘not much to build a relationship on’).                                                                                                                                           |

|                                                            |                                                                                                                                                                                                                                                                                                                                                                                                                                                                                                                                                                                                                                                                                                                                                   |     |                                                                                                                                                                                                                                                                                                                                                                                                                                                                                                   |
|------------------------------------------------------------|---------------------------------------------------------------------------------------------------------------------------------------------------------------------------------------------------------------------------------------------------------------------------------------------------------------------------------------------------------------------------------------------------------------------------------------------------------------------------------------------------------------------------------------------------------------------------------------------------------------------------------------------------------------------------------------------------------------------------------------------------|-----|---------------------------------------------------------------------------------------------------------------------------------------------------------------------------------------------------------------------------------------------------------------------------------------------------------------------------------------------------------------------------------------------------------------------------------------------------------------------------------------------------|
|                                                            | of this committee, and specifically the role of users. User groups at annual [User Group meeting] have commented on the proposal and several groups have agreed to help develop the information and consent process.”                                                                                                                                                                                                                                                                                                                                                                                                                                                                                                                             |     |                                                                                                                                                                                                                                                                                                                                                                                                                                                                                                   |
| 5<br>Ongoing<br>Oversight +<br>managerial                  | Had a PPI co-applicant.<br>“We have identified consumer representation from participants in our previous studies, and one, who is a grant applicant, has contributed to the development of the application, trial design and study documentation, particularly the information to be provided about the safety and efficacy of [device]. We have identified a consumer representative to ensure that patients' views are incorporated into the design from the start. She is a grant applicant and has already contributed to the trial design and the participant information sheet. Consumer groups will ensure all relevant issues are covered, that patient information and survey instruments are acceptable and outcome measures relevant.” | Y   | Has PPI co-applicant. CI had no expectations for but had prior experience of PPI; challenges (finding the right people; finding people without an “axe to grind”). 2 PPI contributors interviewed had no prior experience of PPI; challenges (jargon, not liking flying).                                                                                                                                                                                                                         |
| 10<br>Ongoing<br>Oversight +<br>managerial +<br>responsive | Had PPI co-investigator.<br>No documented plans.                                                                                                                                                                                                                                                                                                                                                                                                                                                                                                                                                                                                                                                                                                  | n/a | Has co-investigator (from local authority). Consulted with parents regarding timing of intervention. Has a contributor on TSC. When getting low response, approached [education professionals] for advice. CI had expectations for PPI; said had no formal PPI experience “only informal”; challenges (sometimes difficult to get in touch with co-investigator contributor due to other commitments). PPI contributor had prior experience of PPI; challenges (concern about “being too picky”). |
| 4<br>Ended<br>Managerial                                   | No PPI co-applicants.<br>“A project management steering group [...] will include all co-applicants, research assistants and user representatives. User representatives will be involved in the development, implementation and interpretation of the study. This involvement will include: advice on recruiting patients, invitation letters, the design of information leaflets, and research instruments, piloting assessments, helping to assess progress, and contributing to the evaluation of the project, the interpretation of findings and the dissemination of results. User representatives will be invited to project steering group meetings and                                                                                     | Y   | Had 2 PPI members on the trial management group. Involved in most activities as envisaged and while unclear from CI interview about plans for interpretation of the study, responses to the CI survey indicate that analysis had not yet started. CI had expectations for and prior experience of PPI; no challenges. No PPI contributor interview.                                                                                                                                               |

|                                                            |                                                                                                                                                                                                                                                                                                                                                                                                                                                                                                                                                                                                                                                                                                                                                                                                                                                                                                                                                                                                                                                                                                                                                                                             |   |                                                                                                                                                                                                                                                                                                                                                                                                                                                           |
|------------------------------------------------------------|---------------------------------------------------------------------------------------------------------------------------------------------------------------------------------------------------------------------------------------------------------------------------------------------------------------------------------------------------------------------------------------------------------------------------------------------------------------------------------------------------------------------------------------------------------------------------------------------------------------------------------------------------------------------------------------------------------------------------------------------------------------------------------------------------------------------------------------------------------------------------------------------------------------------------------------------------------------------------------------------------------------------------------------------------------------------------------------------------------------------------------------------------------------------------------------------|---|-----------------------------------------------------------------------------------------------------------------------------------------------------------------------------------------------------------------------------------------------------------------------------------------------------------------------------------------------------------------------------------------------------------------------------------------------------------|
|                                                            | also provide assistance in each centre.”                                                                                                                                                                                                                                                                                                                                                                                                                                                                                                                                                                                                                                                                                                                                                                                                                                                                                                                                                                                                                                                                                                                                                    |   |                                                                                                                                                                                                                                                                                                                                                                                                                                                           |
| 7<br>Ongoing<br>Oversight +<br>managerial +<br>responsive  | Had a PPI co-applicant.<br>“We will include patients and carers as active participants in the research at all stages. [Name] and [name] have taken the role of patient representatives during the preparation of this research proposal. As the relevant service users are highly likely to be frail, we will use innovative methods to allow full involvement. We will not expect attendance at full research team meetings by patients or carers, although our patient representatives may bring their views to the team meetings, following meetings with individual or groups of service users in other forums. We identified service users to be involved in this trial through the [names of 2 organisations]. Our named co-applicant will attend Trial Management Group meetings throughout the study in order to contribute the service user perspective at all stages. In addition, [name] is a named co-applicant to the study and will play a role in ensuring that a patient focus is maintained throughout the study. We also plan to seek further views through a wider stakeholder group that will feed into the Trial Management Group through a nominated representative.” | Y | Has PPI co-applicant and membership on trial management, steering and data monitoring groups. Also consult separate panel of service users for specific issues. CI had expectations for and prior experience of PPI; challenges (identifying/engaging the right people; some less able to articulate their views; some wanting to do something impossible; difficulty getting other staff to understand or prioritise PPI). No PPI contributor interview. |
| 14<br>Ongoing<br>Managerial                                | Had a PPI co-applicant.<br>“Co-applicant with an academic interest in representing patients' perspectives in the design and conduct of health care research will advise the research team on the development of processes and materials which take into account patient concerns”.                                                                                                                                                                                                                                                                                                                                                                                                                                                                                                                                                                                                                                                                                                                                                                                                                                                                                                          | Y | Has PPI co-applicant but CI felt it was a “tick box” exercise. CI had no expectations for or prior experience of PPI; challenges (meetings attendance; lack of engagement). No PPI contributor interview.                                                                                                                                                                                                                                                 |
| 41<br>Ongoing<br>Oversight +<br>managerial +<br>responsive | Had a PPI co-applicant.<br>“A representative from [charity] has been involved in preparatory work and will be nominated as a member of the TSC. A minimum of two users will be invited to be part of the project team. A virtual user advisory group will be developed to provide further user support as appropriate. User involvement will contribute to: TSC and project management decisions on all stages of the project; project approval; refinement of self-assessment tools and advice package, exercise intervention; training events for health professionals; interpretation of findings; evaluation of user involvement; dissemination.”                                                                                                                                                                                                                                                                                                                                                                                                                                                                                                                                       | Y | Has PPI co-applicant. Trial has 2 PPI contributors although CI feels no strong PPI input overall. Unclear whether CI had expectations for PPI; had no prior experience of PPI; challenges (contributors with an “axe to grind”; contributors’ lack confidence about contributing at meetings). No PPI contributor interview.                                                                                                                              |
| 55                                                         | Had a PPI co-applicant.                                                                                                                                                                                                                                                                                                                                                                                                                                                                                                                                                                                                                                                                                                                                                                                                                                                                                                                                                                                                                                                                                                                                                                     | Y | Had PPI co-applicant. Planned to involve consumer                                                                                                                                                                                                                                                                                                                                                                                                         |

|                                                                                     |                                                            |                                                                                                                                                                                                                                                                                                                                                                                                                                                                                                                                                                                                                                                                                        |   |                                                                                                                                                                                                                                                                                                                                                                                                                                                                                                                                                                                                 |
|-------------------------------------------------------------------------------------|------------------------------------------------------------|----------------------------------------------------------------------------------------------------------------------------------------------------------------------------------------------------------------------------------------------------------------------------------------------------------------------------------------------------------------------------------------------------------------------------------------------------------------------------------------------------------------------------------------------------------------------------------------------------------------------------------------------------------------------------------------|---|-------------------------------------------------------------------------------------------------------------------------------------------------------------------------------------------------------------------------------------------------------------------------------------------------------------------------------------------------------------------------------------------------------------------------------------------------------------------------------------------------------------------------------------------------------------------------------------------------|
| 1<br>2<br>3<br>4<br>5<br>6<br>7<br>8<br>9<br>10<br>11<br>12<br>13<br>14<br>15<br>16 | Ended Oversight + managerial                               | “Patient reps have been very much involved in the preparation of this bid since its inception. The lead service user joined the TSG, will co-ordinate involvement of service users in the consumer panel and report their views to the TSG. Members of the consumer panel have commented on the current proposal and will be asked to comment on specific design and / or management issues during the course of the study. In particular, their views have been, and will continue to be sought during the preparation of patient information leaflets and posters, and in the preparation of study newsletters. They will be asked to help with dissemination of research findings.” |   | panel in dissemination of the findings. This did not happen but PPI ‘evolved’ because the team disseminated through other partners i.e. other patients they were “working with in the field” by that time. Other plans were adhered to. CI had expectations for and prior experience of PPI; challenges (not realising how much training the panel might need; not being clear about expectations of the main contributor; panel feeling ostracised; difficulty getting trial manager to understand importance and use of the patient panel in the early stages). No PPI contributor interview. |
| 17<br>18<br>19<br>20<br>21<br>22<br>23<br>24                                        | 15 Ended Oversight + managerial                            | Had a PPI co-applicant.<br>“[Name], a former patient and lay member of the advisory panel, has been fully involved in the application process as a co-applicant and will be a full, active and vocal member. The trial will be guided by a group of respected and experienced critical care personnel and trialists as well as a ‘lay’ representative.”                                                                                                                                                                                                                                                                                                                                | Y | No CI interview. PPI co-applicant helped to prepare paperwork for funding; also member of TSC. PPI contributor had prior experience of PPI; challenges (jargon).                                                                                                                                                                                                                                                                                                                                                                                                                                |
| 25<br>26<br>27<br>28<br>29<br>30<br>31                                              | 34+ Ended Managerial                                       | Had a PPI co-applicant.<br>“This proposal has been reviewed by our patient service user group and any opinions and comments incorporated. A patient representative will attend TSC meetings and be directly involved in decision making of trial processes and then relay back information to the [user groups] on a regular basis. Our Service Users group will be involved in all aspects of project design, data collection, analysis and dissemination.”                                                                                                                                                                                                                           | U | No CI interview. Had PPI co-applicant who appears to have been involved as intended, but it is not clear whether plans to involve the user group in data collection, analysis and dissemination were implemented. PPI contributor had prior experience of PPI; challenges (not being involved from the start).                                                                                                                                                                                                                                                                                  |
| 32<br>33<br>34<br>35<br>36                                                          | 18+ Ongoing Managerial                                     | Unclear whether had PPI co-applicants.<br>Same plans as trial 34 above†                                                                                                                                                                                                                                                                                                                                                                                                                                                                                                                                                                                                                | U | As above except unclear whether the informant was a co-applicant on this particular trial.                                                                                                                                                                                                                                                                                                                                                                                                                                                                                                      |
| 37                                                                                  | <b>c) Trials which included a responsive role (n=14) †</b> |                                                                                                                                                                                                                                                                                                                                                                                                                                                                                                                                                                                                                                                                                        |   |                                                                                                                                                                                                                                                                                                                                                                                                                                                                                                                                                                                                 |
| 38<br>39<br>40<br>41<br>42<br>43<br>44<br>45<br>46<br>47<br>48<br>49                | 20 Ended                                                   | Had a PPI co-applicant.<br>“The research team will convene a steering group of research and service                                                                                                                                                                                                                                                                                                                                                                                                                                                                                                                                                                                    | Y | Had input from four PPI contributors at different times. Membership on TSC. Sought additional input                                                                                                                                                                                                                                                                                                                                                                                                                                                                                             |



|                                                                                     |                                                    |                                                                                                                                                                                                                                                                                                                                                                                                                                                                                                                                                                                                                                                                                                                                                                                                                                                                                                 |   |                                                                                                                                                                                                                                                                                                                                                                                                                                                                  |
|-------------------------------------------------------------------------------------|----------------------------------------------------|-------------------------------------------------------------------------------------------------------------------------------------------------------------------------------------------------------------------------------------------------------------------------------------------------------------------------------------------------------------------------------------------------------------------------------------------------------------------------------------------------------------------------------------------------------------------------------------------------------------------------------------------------------------------------------------------------------------------------------------------------------------------------------------------------------------------------------------------------------------------------------------------------|---|------------------------------------------------------------------------------------------------------------------------------------------------------------------------------------------------------------------------------------------------------------------------------------------------------------------------------------------------------------------------------------------------------------------------------------------------------------------|
| 1<br>2<br>3<br>4<br>5<br>6<br>7<br>8<br>9<br>10<br>11<br>12<br>13<br>14<br>15<br>16 | Managerial + responsive                            | users. This will meet three times during the study and will provide an opportunity for the research team to consult about research design and methods for data collection, choice of outcomes and methods for data analyses. The TSC will have an important role in interpreting initial findings and developing dissemination strategies. Consultation with young people and parents will be carried out in intervention and comparison clinics using focus groups. The views gathered in these groups will inform the development of research procedures (e.g. consent, outcome measures), tools for data collection and the process evaluation. Focus groups will also provide opportunity for young people to contribute to interpretation of study findings. Further consultation with young people will involve piloting all research tools to ensure acceptability and appropriateness." |   | when struggling with particular issues. CI had expectations for and prior experience of PPI; challenges (having a contributor who was a patient of the lead PI - "conflict of roles"; frustration at inability to integrate contributors' ideas regarding questionnaire which was a validated instrument and therefore could not be altered.) PPI contributor had no prior experience except as charity member; no challenges.                                   |
| 17<br>18<br>19<br>20<br>21<br>22<br>23<br>24<br>25<br>26<br>27                      | 101<br>Ended<br>Oversight + responsive             | No PPI co-applicants.<br>"We will convene user group meetings in each locality during the pilot study, we will organise separate focus groups to explore expectations of treatment. We have a commitment from panels of users/experts including representatives from relevant charities to meet annually during the study to advise on its conduct. We will have lay representation on the TSC."                                                                                                                                                                                                                                                                                                                                                                                                                                                                                                | Y | Had PPI membership on TSC and consulted with wider groups as planned. CI felt PPI was under utilised and said "people above me in the scheme of things may see it as a tick box exercise". CI had no expectations for PPI; unclear regarding prior experience of PPI; challenges (finding suitable people, "pinning people down", some may find it daunting whereas "professional PPI reps" do not). PPI contributor had prior experience of PPI; no challenges. |
| 28<br>29<br>30<br>31<br>32<br>33<br>34<br>35<br>36<br>37                            | 21<br>Ended<br>Oversight + managerial + responsive | Had a PPI co-applicant.<br>"User and consumer groups have discussed the application and suggested changes to protocol which we have accepted. In the trial the groups will be asked to help with development of info leaflets, consent forms, letters, questionnaire design. The groups were very keen that a user was a collaborator on grant application. The team includes [name], a consumer representative who is chair of [Consumer Research Group], works with the [condition] Association and the [Research Network]."                                                                                                                                                                                                                                                                                                                                                                  | Y | Plans expanded (in terms of recruitment, analysis, interpretation of results, dissemination). CI had expectations for and prior experience of PPI; challenges ("poaching" of contributors; stress about funding/paying contributors for their time if in receipt of benefits/pension; disagreement with funders regarding contributor's activities). PPI contributor had prior experience of PPI; challenges (time; being in demand).                            |
| 38<br>39<br>40<br>41<br>42<br>43<br>44<br>45<br>46<br>47<br>48<br>49                | 27<br>Ongoing                                      | No PPI co-applicants.<br>"We will include two [condition] patients to act in an advisory capacity. They                                                                                                                                                                                                                                                                                                                                                                                                                                                                                                                                                                                                                                                                                                                                                                                         | Y | Has PPI membership on trial management, steering, and data monitoring groups. CI had expectations for                                                                                                                                                                                                                                                                                                                                                            |

1  
2  
3  
4  
5  
6  
7  
8  
9  
10  
11  
12  
13  
14  
15  
16  
17  
18  
19  
20  
21  
22  
23  
24  
25  
26  
27  
28  
29  
30  
31  
32  
33  
34  
35  
36  
37  
38  
39  
40  
41  
42  
43  
44  
45  
46  
47  
48  
49

|                                                      |                                                                                                                                                                                                                                                                                                                                                                                                                                                                                                                        |     |                                                                                                                                                                                                                                                                                                                                                                                                                                |
|------------------------------------------------------|------------------------------------------------------------------------------------------------------------------------------------------------------------------------------------------------------------------------------------------------------------------------------------------------------------------------------------------------------------------------------------------------------------------------------------------------------------------------------------------------------------------------|-----|--------------------------------------------------------------------------------------------------------------------------------------------------------------------------------------------------------------------------------------------------------------------------------------------------------------------------------------------------------------------------------------------------------------------------------|
| Oversight + managerial + responsive                  | will be invited to attend all collaborator meetings and quarterly trial management meetings. We will disseminate project information and findings for patients and patient groups.”                                                                                                                                                                                                                                                                                                                                    |     | and prior experience of PPI; challenges (finding contributors). 2 PPI contributors interviewed had no prior experience of PPI; challenges (some doctors don’t want to understand your point of view; jargon; they talk about things you have gone through as a patient in a dispassionate way).                                                                                                                                |
| 10<br>Ongoing<br>Oversight + managerial + responsive | Had PPI ‘co-investigator’.<br>No documented plans.                                                                                                                                                                                                                                                                                                                                                                                                                                                                     | n/a | Consulted with parents regarding timing of intervention. Has a contributor on TSC. When getting low response, approached [education professionals] for advice. CI had expectations for PPI; said had no formal PPI experience “only informal”; challenges (sometimes difficult to get in touch with co-investigator contributor due to other commitments). PPI contributor’s challenges: concern about ‘being too pernickety’. |
| 9<br>Ended<br>Oversight + responsive                 | Unclear whether there were PPI co-applicants.<br>“The TSC will include a patient representative, [name], who has acted in this capacity in several other large-scale trials and is aware of issues that might be raised from the lay perspective. The patient information leaflet and consent form have been reviewed by potential service users, and their comments taken into account in finalising these documents prior to submission for ethics approval.”                                                        | Y   | Unclear whether CI had expectations for or prior experience of PPI; no challenges. No PPI contributor interview.                                                                                                                                                                                                                                                                                                               |
| 102<br>Ended<br>Oversight + responsive               | No PPI co-applicants.<br>“At the outline proposal stage, this trial was submitted to the [name of funding body] who sought the opinion of the [condition] Society. The [condition] Society unequivocally confirmed their support of the proposed trial. The [condition] Society have also confirmed their willingness to represent their members through steering committee membership of the [name of trial] and to help the trialists in the construction of the MREC application and patient information leaflets.” | Y   | Seems to have expanded plans (in terms of dissemination, i.e. press releases and findings for participants). CI had expectations for and prior experience of PPI; no challenges. No PPI contributor interview.                                                                                                                                                                                                                 |
| 6<br>Ongoing                                         | No PPI co-applicants.<br>“The TSC will include an already identified patient. He will provide an                                                                                                                                                                                                                                                                                                                                                                                                                       | Y   | CI had expectations for but unclear whether had prior experience of PPI; no challenges. No PPI                                                                                                                                                                                                                                                                                                                                 |

|                                                                                                    |                                                      |                                                                                                                                                                                                                                                                                                                                                                                                                                                                                                                                                                                                                                                                                                                                                                                                                                                                                                                                                                                                                                                                                                                                                                                             |     |                                                                                                                                                                                                                                                                                                                                                          |
|----------------------------------------------------------------------------------------------------|------------------------------------------------------|---------------------------------------------------------------------------------------------------------------------------------------------------------------------------------------------------------------------------------------------------------------------------------------------------------------------------------------------------------------------------------------------------------------------------------------------------------------------------------------------------------------------------------------------------------------------------------------------------------------------------------------------------------------------------------------------------------------------------------------------------------------------------------------------------------------------------------------------------------------------------------------------------------------------------------------------------------------------------------------------------------------------------------------------------------------------------------------------------------------------------------------------------------------------------------------------|-----|----------------------------------------------------------------------------------------------------------------------------------------------------------------------------------------------------------------------------------------------------------------------------------------------------------------------------------------------------------|
| 5<br>6<br>7<br>8<br>9                                                                              | Oversight + responsive                               | informed patient perspective. He is willing to assist us in the trial, and will be listed as a member of the TSC. We will also work with [charity] to involve service users. This will be done through our links with the [unit], which is co-directed by one of our applicants, [name]. We will begin this process during the protocol set-up period.”                                                                                                                                                                                                                                                                                                                                                                                                                                                                                                                                                                                                                                                                                                                                                                                                                                     |     | contributor interview.                                                                                                                                                                                                                                                                                                                                   |
| 10<br>11<br>12<br>13<br>14<br>15<br>16<br>17<br>18<br>19<br>20<br>21<br>22<br>23<br>24<br>25<br>26 | 7<br>Ongoing<br>Oversight + managerial + responsive  | Had a PPI co-applicant.<br>“We will include patients and carers as active participants in the research at all stages. [Name] and [name] have taken the role of patient representatives during the preparation of this research proposal. As the relevant service users are highly likely to be frail, we will use innovative methods to allow full involvement. We will not expect attendance at full research team meetings by patients or carers, although our patient representatives may bring their views to the team meetings, following meetings with individual or groups of service users in other forums. We identified service users to be involved in this trial through the [names of 2 organisations]. Our named co-applicant will attend Trial Management Group meetings throughout the study in order to contribute the service user perspective at all stages. In addition, [name] is a named co-applicant to the study and will play a role in ensuring that a patient focus is maintained throughout the study. We also plan to seek further views through a wider stakeholder group that will feed into the Trial Management Group through a nominated representative.” | Y   | Consulted separate panel of service users for specific issues. CI had expectations for and prior experience of PPI; challenges (identifying/engaging the right people; some less able to articulate their views; some wanting to do something impossible; difficulty getting other staff to understand or prioritise PPI). No PPI contributor interview. |
| 27<br>28<br>29<br>30<br>31<br>32<br>33<br>34<br>35<br>36                                           | 41<br>Ongoing<br>Oversight + managerial + responsive | Had a PPI co-applicant.<br>“A representative from [charity] has been involved in preparatory work and will be nominated as a member of the TSC. A minimum of two users will be invited to be part of the project team. A virtual user advisory group will be developed to provide further user support as appropriate. User involvement will contribute to: TSC and project management decisions on all stages of the project; project approval; refinement of self-assessment tools and advice package, exercise intervention; training events for health professionals; interpretation of findings; evaluation of user involvement; dissemination.”                                                                                                                                                                                                                                                                                                                                                                                                                                                                                                                                       | Y   | Has PPI co-applicant. Trial has 2 PPI contributors although CI feels no strong PPI input overall. Unclear whether CI had expectations for PPI; had no prior experience of PPI; challenges (contributors with an “axe to grind”; contributors’ lack confidence about contributing at meetings). No PPI contributor interview.                             |
| 37<br>38<br>39<br>40                                                                               | 79<br>Ended<br>Oversight +                           | No PPI co-applicants.<br>No documented plans.                                                                                                                                                                                                                                                                                                                                                                                                                                                                                                                                                                                                                                                                                                                                                                                                                                                                                                                                                                                                                                                                                                                                               | n/a | Although no documented plans the CI wanted PPI to sit on TSC and comment on patient info leaflets. The CI felt that PPI started early. There were 2 types of                                                                                                                                                                                             |

|                                            |                                                                                                                                                                                                                                                                                                                                                                                                                                                                                                                                                                                                                                                                                                                                                                                                           |   |                                                                                                                                                                                                                                                                                                                                                                                                                                                                                                                                                      |
|--------------------------------------------|-----------------------------------------------------------------------------------------------------------------------------------------------------------------------------------------------------------------------------------------------------------------------------------------------------------------------------------------------------------------------------------------------------------------------------------------------------------------------------------------------------------------------------------------------------------------------------------------------------------------------------------------------------------------------------------------------------------------------------------------------------------------------------------------------------------|---|------------------------------------------------------------------------------------------------------------------------------------------------------------------------------------------------------------------------------------------------------------------------------------------------------------------------------------------------------------------------------------------------------------------------------------------------------------------------------------------------------------------------------------------------------|
| responsive                                 |                                                                                                                                                                                                                                                                                                                                                                                                                                                                                                                                                                                                                                                                                                                                                                                                           |   | involvement: 2 contributors on the TSC; and then obtained views on information sheets from relevant groups. CI had no previous experience of PPI; no challenges. No PPI contributor interview.                                                                                                                                                                                                                                                                                                                                                       |
| 76<br>Ongoing<br>Oversight +<br>responsive | No PPI co-applicants.<br>“The [organisation] has recently established a Research Advisory Group. This Group, which includes key stakeholders with an interest in the research carried out by [organisation] (patients, charities representing patients’ interests, general practitioners, NHS commissioners, research funding organisations and a regional [medical] network), has been set up to ensure that the clinical research carried out in [organisation] is ethical, important, relevant, appropriately designed to meet the needs of patients and the NHS. We anticipate the Group would have the opportunity to influence important details of the project before recruitment starts. A patient representative (we propose a member of the [advisory group]) will be invited to join the TSC.” | U | Has PPI membership on TSC as planned; unclear whether plans to seek advice of new advisory group prior to recruitment were implemented (although did approach a group of patients from a previous trial about format/comprehensibility of questionnaire). CI talked of a “tick box exercise” but also ensuring participants’ perspective; “overseeing the trial – a ‘safeguard’ rather than improving research”. CI had expectations for but no prior experience of PPI; challenges (communication and understanding). No PPI contributor interview. |
| 106<br>Ended<br>Oversight +<br>responsive  | No PPI co-applicants.<br>“We have consulted widely, including with patients to seek their views on trial design and relevant outcome measures. We have involved service users in the design of the trial. We used the patient information pack and part of the questionnaire that has been developed and validated in collaborative research with the [institute] as a basis for in-depth interviews to identify patient perspectives on trial design and outcomes. We have identified one service user, [name], who will advise the trial management committee on patient perspectives.”                                                                                                                                                                                                                 | Y | No CI interview. PPI contributor had prior experience of PPI but felt she had made no difference to the trial; no challenges.                                                                                                                                                                                                                                                                                                                                                                                                                        |
| 91<br>Ongoing<br>Oversight +<br>responsive | No PPI co-applicants.<br>“We have involved [name] who is a non-executive patient representative member of [hospital trust] and who has co-ordinated consumers’ input into the scientific quality, feasibility and practicality of the proposal. She will continue to participate in the protocol design of the study and be a member of the TSC.”                                                                                                                                                                                                                                                                                                                                                                                                                                                         | Y | No CI interview. Plans expanded (in terms of the PPI contributor obtaining feedback from “women’s groups”). PPI contributor had prior experience of PPI; challenges (just being confident enough to make your point).                                                                                                                                                                                                                                                                                                                                |

\* As described in the funding application and/or study protocol; includes justification of costs where data were available

1  
2  
3  
4  
5  
6  
7  
8  
9  
10  
11  
12  
13  
14  
15  
16  
17  
18  
19  
20  
21  
22  
23  
24  
25  
26  
27  
28  
29  
30  
31  
32  
33  
34  
35  
36  
37  
38  
39  
40  
41  
42  
43  
44  
45  
46  
47  
48  
49

\*\*As reported during informant interviews - any reference to tokenism; whether CI had prior experience of or personal expectations for PPI; whether CI mentioned challenges; whether PPI contributor mentioned challenges  
† PPI contributor was discussing 2 trials [id 18 and 34] during the interview  
‡ Many trials utilised more than one form of PPI  
TSC=trial steering committee

For peer review only

**Table 2 Summary of challenges met by CIs and contributors to PPI in clinical trials**

| CI interviews (n=21)                                                                        | PPI contributor interviews (n=17)*                        |
|---------------------------------------------------------------------------------------------|-----------------------------------------------------------|
| <u>Challenges common to researchers and PPI contributors:</u>                               |                                                           |
| Failure to engage contributors fully or early                                               | Not being involved from the start;<br>Infrequent meetings |
| Contributors overawed/lacking confidence                                                    | Feeling unqualified or overwhelmed                        |
| Failing to clarify to contributors what was expected of them                                | Role expectations (being unsure what was expected of you) |
| Worry about taking up contributor's time                                                    | Time constraints                                          |
| Contributors being 'poached'                                                                | Being in demand by other research teams                   |
| Meeting attendance by PPI contributors                                                      | Getting to meetings                                       |
| <u>Challenges unique to researchers or PPI contributors:</u>                                |                                                           |
| Finding the right people                                                                    | Jargon                                                    |
| Own patient as a PPI contributor (can lead to conflict between clinical and research roles) | Interactions within team and being listened to            |
| Communication difficulties due to age                                                       | Concern about appearing confrontational                   |
| Change of PPI personnel                                                                     | Concern about appearing too 'pernickety'                  |
| Getting other team members to understand/prioritise PPI                                     | Remembering 'what side you are on'                        |
| Underestimating training needs of contributors                                              |                                                           |
| Worry that contributors may lose payment if receiving state pension/benefits                |                                                           |
| Disagreement with funders about implementing contributors' suggestions                      |                                                           |

\* One PPI contributor was involved in and talked about 2 trials which were in this sample, and there were 2 trials for which we had 2 PPI contributor interviews each

1  
2  
3  
4  
5  
6  
7  
8  
9  
10  
11  
12  
13  
14  
15  
16  
17  
18  
19  
20  
21  
22  
23  
24  
25  
26  
27  
28  
29  
30  
31  
32  
33  
34  
35  
36  
37  
38  
39  
40  
41  
42  
43  
44  
45  
46  
47  
48  
49

For peer review only

**COREQ (Consolidated criteria for reporting qualitative research): 32-item checklist for interviews and focus groups**

**Domain 1: Research team and reflexivity**

| Personal Characteristics       |                                          |                                                                                                                                                                                                                                                                                                                                                                |
|--------------------------------|------------------------------------------|----------------------------------------------------------------------------------------------------------------------------------------------------------------------------------------------------------------------------------------------------------------------------------------------------------------------------------------------------------------|
| 1.                             | Interviewer/facilitator                  | Which author/s conducted the interview or focus group?<br><i>Described in methods.</i>                                                                                                                                                                                                                                                                         |
| 2.                             | Credentials                              | What were the researcher's credentials? <i>E.g. PhD, MD</i><br><i>Described in methods.</i>                                                                                                                                                                                                                                                                    |
| 3.                             | Occupation                               | What was their occupation at the time of the study?<br><i>Described in methods.</i>                                                                                                                                                                                                                                                                            |
| 4.                             | Gender                                   | Was the researcher male or female?<br><i>Obvious from contextual information in the paper.</i>                                                                                                                                                                                                                                                                 |
| 5.                             | Experience and training                  | What experience or training did the researcher have?<br><i>Described in methods.</i>                                                                                                                                                                                                                                                                           |
| Relationship with participants |                                          |                                                                                                                                                                                                                                                                                                                                                                |
| 6.                             | Relationship established                 | Was a relationship established prior to study commencement?<br><i>Described in methods.</i>                                                                                                                                                                                                                                                                    |
| 7.                             | Participant knowledge of the interviewer | What did the participants know about the researcher? <i>e.g. personal goals, reasons for doing the research</i><br><i>Participants were informed of the reasons for the research in the information leaflet.</i>                                                                                                                                               |
| 8.                             | Interviewer characteristics              | What characteristics were reported about the interviewer/facilitator? <i>e.g. Bias, assumptions, reasons and interests in the research topic</i><br><i>The interviewer was new to the field of patient involvement in research and sought to maintain an open minded approach in exploring its implementation in trials – this is reported in the methods.</i> |

**Domain 2: Study design**

| Theoretical framework |                                       |                                                                                                                                                                                                 |
|-----------------------|---------------------------------------|-------------------------------------------------------------------------------------------------------------------------------------------------------------------------------------------------|
| 9.                    | Methodological orientation and Theory | What methodological orientation was stated to underpin the study? <i>e.g. grounded theory, discourse analysis, ethnography, phenomenology, content analysis</i><br><i>Described in methods.</i> |



|                       |                              |                                                                                                                                                                                                                                   |
|-----------------------|------------------------------|-----------------------------------------------------------------------------------------------------------------------------------------------------------------------------------------------------------------------------------|
| Participant selection |                              |                                                                                                                                                                                                                                   |
| 10.                   | Sampling                     | How were participants selected? <i>e.g. purposive, convenience, consecutive, snowball</i><br>Described in methods.                                                                                                                |
| 11.                   | Method of approach           | How were participants approached? <i>e.g. face-to-face, telephone, mail, email</i><br>Described in methods.                                                                                                                       |
| 12.                   | Sample size                  | How many participants were in the study?<br>Described in methods.                                                                                                                                                                 |
| 13.                   | Non-participation            | How many people refused to participate or dropped out?<br>Described in methods.<br>Reasons? Not known.                                                                                                                            |
| Setting               |                              |                                                                                                                                                                                                                                   |
| 14.                   | Setting of data collection   | Where was the data collected? <i>e.g. home, clinic, workplace</i><br>Telephone interviews (described).                                                                                                                            |
| 15.                   | Presence of non-participants | Was anyone else present besides the participants and researchers?<br><i>n/a – telephone interviews</i>                                                                                                                            |
| 16.                   | Description of sample        | What are the important characteristics of the sample? <i>e.g. demographic data, date</i><br>Described in methods.                                                                                                                 |
| Data collection       |                              |                                                                                                                                                                                                                                   |
| 17.                   | Interview guide              | Were questions, prompts, guides provided by the authors?<br>Described in a 'sister' paper.<br>Was it pilot tested?<br>Reviewed by patient advisory group and developed in light of on-going data analysis – described in methods. |
| 18.                   | Repeat interviews            | Were repeat interviews carried out? If yes, how many?<br>No, described in methods.                                                                                                                                                |
| 19.                   | Audio/visual recording       | Did the research use audio or visual recording to collect the data?<br>Yes – audio (described in methods).                                                                                                                        |
| 20.                   | Field notes                  | Were field notes made during and/or after the interview or focus group?<br>Described in methods.                                                                                                                                  |
| 21.                   | Duration                     | What was the duration of the interviews or focus group?<br>Described in methods.                                                                                                                                                  |
| 22.                   | Data saturation              | Was data saturation discussed?<br>Described in 'sister' paper.                                                                                                                                                                    |
| 23.                   | Transcripts returned         | Were transcripts returned to participants for comment and/or correction?<br>Described in methods.                                                                                                                                 |

## Domain 3: analysis and findings

|               |                                |                                                                                                                                                                         |
|---------------|--------------------------------|-------------------------------------------------------------------------------------------------------------------------------------------------------------------------|
| Data analysis |                                |                                                                                                                                                                         |
| 24.           | Number of data coders          | How many data coders coded the data?<br>Yes - described in methods.                                                                                                     |
| 25.           | Description of the coding tree | Did authors provide a description of the coding tree?<br>No, although available upon request (mentioned in methods).                                                    |
| 26.           | Derivation of themes           | Were themes identified in advance or derived from the data?<br>Derived – described in methods.                                                                          |
| 27.           | Software                       | What software, if applicable, was used to manage the data?<br>Described in methods.                                                                                     |
| 28.           | Participant checking           | Did participants provide feedback on the findings?<br>No – acknowledged in methods.                                                                                     |
| Reporting     |                                |                                                                                                                                                                         |
| 29.           | Quotations presented           | Were participant quotations presented to illustrate the themes / findings? Was each quotation identified? e.g. <i>participant number</i><br>Yes - described in methods. |
| 30.           | Data and findings consistent   | Was there consistency between the data presented and the findings?<br>Yes.                                                                                              |
| 31.           | Clarity of major themes        | Were major themes clearly presented in the findings?<br>Yes.                                                                                                            |
| 32.           | Clarity of minor themes        | Is there a description of diverse cases or discussion of minor themes?<br>Yes.                                                                                          |
